# Supplementary material for: Substituent effect in theoretical VCD spectra
Source: Royal Society of Chemistry journal article supplement (doi:10.1039/c4ra03215b), 2014-01-01
Supplement: c4ra03215b1.pdf [file c4ra03215b1.pdf]

## Supporting information

# Substituent effect in theoretical VCD spectra

Piotr F.J. Lipiński<sup>\*,†</sup> and Jan Cz. Dobrowolski<sup>\*,‡,§</sup>

*Mossakowski Medical Research Centre Polish Academy of Sciences, Warsaw, Poland, National Medicines Institute and Institute of Nuclear Chemistry and Technology, Warsaw, Poland*

### Table of Contents

|                                                                                         |              |
|-----------------------------------------------------------------------------------------|--------------|
| <b>Spectral parameters of selected modes</b>                                            | <b>SI-2</b>  |
| ν(CN) in CN-IND                                                                         | SI-2         |
| ν(NC) in NC-IND                                                                         | SI-5         |
| ν(CH) in CN-IND                                                                         | SI-8         |
| ν(CH) in NC-IND                                                                         | SI-11        |
| Rotational strength factors in CN-IND                                                   | SI-14        |
| Rotational strength factors in NC-IND                                                   | SI-17        |
| <b>Correlations of spectral parameters of selected modes with substituent constants</b> | <b>SI-20</b> |
| ν(NC) in NC-IND                                                                         | SI-20        |
| ν(CH) in CN-IND                                                                         | SI-21        |
| ν(CH) in NC-IND                                                                         | SI-22        |
| ν(CN) in CN-IND, rotational strength factors                                            | SI-23        |
| ν(NC) in NC-IND, rotational strength factors                                            | SI-24        |
| ν(CH) in CN-IND, rotational strength factors                                            | SI-25        |
| ν(CH) in NC-IND, rotational strength factors                                            | SI-26        |
| <b>Gaussian 09 input headings</b>                                                       | <b>SI-27</b> |
| <b>Full Gaussian 09 citation</b>                                                        | <b>SI-27</b> |
| <b>Coordinates and energies of CN-IND</b>                                               | <b>SI-28</b> |
| <b>Coordinates and energies of NC-IND</b>                                               | <b>SI-55</b> |

## Spectral parameters of selected modes

**TABLE S1.** Spectral parameters of  $\nu(\text{CN})$  mode in CN-IND with energetics of the conformers. **R/D** is robustness parameter by Gabor (Góbi, S.; Magyarfalvi, G. *Phys. Chem. Chem. Phys.* **2011**, *13*, 16130). **% of population** was calculated at T=298.15K.

| Substituent-<br>Conformer | Frequency<br>[cm <sup>-1</sup> ] | IR intensity<br>[km/mol] | dipole strength<br>[10 <sup>-40</sup> esu <sup>2</sup> cm <sup>2</sup> ] | rotational<br>strength<br>[10 <sup>-44</sup> esu <sup>2</sup> cm <sup>2</sup> ] | R/D<br>[ppm] | Sum of electronic and<br>thermal Free Energies<br>[Hartree] | % of population |
|---------------------------|----------------------------------|--------------------------|--------------------------------------------------------------------------|---------------------------------------------------------------------------------|--------------|-------------------------------------------------------------|-----------------|
| BF <sub>2</sub>           | 2341.1                           | 16.61                    | 28.31                                                                    | -2.483                                                                          | 8.8          | -664.044660                                                 | 100.00          |
| Br                        | 2340.4                           | 18.12                    | 30.89                                                                    | -2.647                                                                          | 8.6          | -3013.509236                                                | 100.00          |
| CHO-1                     | 2341.3                           | 16.73                    | 28.50                                                                    | -2.212                                                                          | 7.8          | -553.275490                                                 | 61.90           |
| CHO-2                     | 2341.6                           | 16.45                    | 28.03                                                                    | -2.704                                                                          | 9.6          | -553.275032                                                 | 38.10           |
| Cl                        | 2340.3                           | 17.77                    | 30.29                                                                    | -2.674                                                                          | 8.8          | -899.571723                                                 | 100.00          |
| COCH <sub>3</sub> -1      | 2340.8                           | 17.78                    | 30.30                                                                    | -2.570                                                                          | 8.5          | -592.574952                                                 | 38.55           |
| COCH <sub>3</sub> -2      | 2340.3                           | 18.07                    | 30.80                                                                    | -2.608                                                                          | 8.5          | -592.575392                                                 | 61.45           |
| CONH <sub>2</sub> -1      | 2340.5                           | 18.01                    | 30.70                                                                    | -2.472                                                                          | 8.1          | -608.652785                                                 | 33.72           |
| CONH <sub>2</sub> -2      | 2340.3                           | 18.23                    | 31.07                                                                    | -2.991                                                                          | 9.6          | -608.653423                                                 | 66.28           |
| COOCH <sub>3</sub> -1     | 2340.6                           | 18.3                     | 31.18                                                                    | -2.488                                                                          | 8.0          | -667.815360                                                 | 43.65           |
| COOCH <sub>3</sub> -2     | 2340.3                           | 18.42                    | 31.39                                                                    | -2.659                                                                          | 8.5          | -667.815601                                                 | 56.35           |
| COOH-1                    | 2341.1                           | 17.11                    | 29.16                                                                    | -2.549                                                                          | 8.7          | -628.538830                                                 | 45.85           |
| COOH-2                    | 2340.9                           | 17.28                    | 29.44                                                                    | -2.442                                                                          | 8.3          | -628.538987                                                 | 54.15           |
| Et-1                      | 2337.9                           | 21.39                    | 36.50                                                                    | -3.746                                                                          | 10.3         | -518.527153                                                 | 42.61           |
| Et-2                      | 2337.7                           | 21.20                    | 36.18                                                                    | -3.403                                                                          | 9.4          | -518.525732                                                 | 9.46            |

|                      |        |       |       |        |      |              |        |
|----------------------|--------|-------|-------|--------|------|--------------|--------|
| Et-3                 | 2338.0 | 20.87 | 35.62 | -2.341 | 6.6  | -518.527264  | 47.93  |
| F                    | 2339.8 | 17.24 | 29.40 | -2.907 | 9.9  | -539.200550  | 100.00 |
| H                    | 2338.8 | 18.95 | 32.32 | -3.162 | 9.8  | -439.940965  | 100.00 |
| iPr-1                | 2337.8 | 21.45 | 36.61 | -3.323 | 9.1  | -557.817476  | 52.36  |
| iPr-2                | 2337.7 | 21.56 | 36.80 | -2.646 | 7.2  | -557.817387  | 47.64  |
| Me                   | 2337.9 | 20.65 | 35.24 | -2.977 | 8.4  | -479.237175  | 100.00 |
| MeS-1                | 2337.9 | 21.35 | 36.43 | -3.941 | 10.8 | -877.442501  | 53.81  |
| MeS-2                | 2338.2 | 21.75 | 37.11 | -2.259 | 6.1  | -877.442357  | 46.19  |
| MeSO <sub>2</sub> -1 | 2342.7 | 15.81 | 26.92 | -2.646 | 9.8  | -1027.836697 | 36.03  |
| MeSO <sub>2</sub> -2 | 2341.8 | 16.29 | 27.75 | -1.662 | 6.0  | -1027.837239 | 63.97  |
| NH <sub>2</sub>      | 2336.2 | 22.19 | 37.89 | -3.591 | 9.5  | -495.295515  | 100.00 |
| NHNH <sub>2</sub> -1 | 2335.8 | 23.26 | 39.73 | -4.438 | 11.2 | -550.604154  | 35.86  |
| NHNH <sub>2</sub> -2 | 2335.3 | 24.08 | 41.14 | -3.018 | 7.3  | -550.604703  | 64.14  |
| NMe <sub>2</sub>     | 2334.9 | 24.92 | 42.57 | -4.122 | 9.7  | -573.855889  | 100.00 |
| NO-1                 | 2342.5 | 15.33 | 26.12 | -2.815 | 10.8 | -569.259127  | 40.07  |
| NO-2                 | 2342.4 | 15.31 | 26.07 | -2.002 | 7.7  | -569.259507  | 59.93  |
| NO <sub>2</sub>      | 2343.0 | 14.50 | 24.69 | -2.142 | 8.7  | -644.479658  | 100.00 |
| OCF <sub>3</sub> -1  | 2340.5 | 17.26 | 29.42 | -2.581 | 8.8  | -852.256190  | 23.70  |
| OCF <sub>3</sub> -2  | 2340.4 | 16.84 | 28.71 | -2.897 | 10.1 | -852.256087  | 21.25  |
| OCF <sub>3</sub> -3  | 2341.2 | 16.07 | 27.38 | -2.203 | 8.0  | -852.256986  | 55.06  |
| OH-1                 | 2337.6 | 19.87 | 33.91 | -3.446 | 10.2 | -515.175261  | 57.80  |
| OH-2                 | 2337.9 | 19.72 | 33.64 | -3.105 | 9.2  | -515.174964  | 42.20  |
| OMe-1                | 2337.4 | 21.33 | 36.41 | -2.853 | 7.8  | -554.449898  | 46.64  |

|                   |        |       |       |        |      |             |        |
|-------------------|--------|-------|-------|--------|------|-------------|--------|
| OMe-2             | 2337.1 | 20.91 | 35.69 | -3.829 | 10.7 | -554.450025 | 53.36  |
| SH                | 2338.7 | 20.03 | 34.16 | -3.103 | 9.1  | -838.154955 | 48.89  |
| SiH <sub>3</sub>  | 2339.4 | 19.33 | 32.97 | -2.676 | 8.1  | -730.638443 | 100.00 |
| SiMe <sub>3</sub> | 2338.2 | 21.64 | 36.93 | -2.774 | 7.5  | -848.551657 | 100.00 |
| tBu-1             | 2337.6 | 21.89 | 37.35 | -2.929 | 7.8  | -597.104273 | 33.27  |
| tBu-2             | 2337.6 | 21.88 | 37.34 | -2.937 | 7.9  | -597.104270 | 33.17  |
| tBu-3             | 2337.6 | 21.87 | 37.33 | -3.250 | 8.7  | -597.104281 | 33.56  |
| Vin-1             | 2338.6 | 21.18 | 36.14 | -1.487 | 4.1  | -517.319332 | 53.54  |
| Vin-2             | 2338.6 | 20.97 | 35.77 | -4.385 | 12.3 | -517.319198 | 46.46  |

**TABLE S2.** Spectral parameters of  $\nu(\text{NC})$  mode in NC-IND with energetics of the conformers.

| <b>Substituent-<br/>Conformer</b> | <b>Frequency<br/>[cm<sup>-1</sup>]</b> | <b>IR intensity<br/>[km/mol]</b> | <b>dipole strength<br/>[10<sup>-40</sup> esu<sup>2</sup>cm<sup>2</sup>]</b> | <b>rotational<br/>strength<br/>[10<sup>-44</sup> esu<sup>2</sup>cm<sup>2</sup>]</b> | <b>R/D</b> | <b>Sum of electronic and<br/>thermal Free<br/>Energies<br/>[Hartree]</b> | <b>% of population</b> |
|-----------------------------------|----------------------------------------|----------------------------------|-----------------------------------------------------------------------------|-------------------------------------------------------------------------------------|------------|--------------------------------------------------------------------------|------------------------|
| BF <sub>2</sub>                   | 2210.6                                 | 190.60                           | 343.99                                                                      | -32.507                                                                             | 9.5        | -664.010806                                                              | 100.00                 |
| Br                                | 2210.8                                 | 193.34                           | 348.88                                                                      | -31.410                                                                             | 9.0        | -3013.475412                                                             | 100.00                 |
| CHO-1                             | 2210.6                                 | 195.41                           | 352.65                                                                      | -29.919                                                                             | 8.5        | -553.241701                                                              | 63.46                  |
| CHO-2                             | 2210.6                                 | 193.58                           | 349.34                                                                      | -33.817                                                                             | 9.7        | -553.241180                                                              | 36.54                  |
| Cl                                | 2210.8                                 | 190.31                           | 343.42                                                                      | -31.123                                                                             | 9.1        | -899.537904                                                              | 100.00                 |
| COCH <sub>3</sub> -1              | 2210.0                                 | 194.92                           | 351.85                                                                      | -32.003                                                                             | 9.1        | -592.541058                                                              | 37.53                  |
| COCH <sub>3</sub> -2              | 2209.9                                 | 192.25                           | 347.06                                                                      | -32.756                                                                             | 9.4        | -592.541539                                                              | 62.47                  |
| CONH <sub>2</sub> -1              | 2211.0                                 | 191.91                           | 346.28                                                                      | -30.572                                                                             | 8.8        | -608.618933                                                              | 34.10                  |
| CONH <sub>2</sub> -2              | 2211.2                                 | 190.47                           | 343.65                                                                      | -34.083                                                                             | 9.9        | -608.619555                                                              | 65.90                  |
| COOCH <sub>3</sub> -1             | 2211.1                                 | 193.88                           | 349.82                                                                      | -30.563                                                                             | 8.7        | -667.781509                                                              | 44.88                  |
| COOCH <sub>3</sub> -2             | 2210.4                                 | 191.81                           | 346.19                                                                      | -33.291                                                                             | 9.6        | -667.781703                                                              | 55.12                  |
| COOH-1                            | 2210.7                                 | 193.43                           | 349.06                                                                      | -32.307                                                                             | 9.3        | -628.504963                                                              | 45.54                  |
| COOH-2                            | 2210.7                                 | 192.63                           | 347.61                                                                      | -32.303                                                                             | 9.3        | -628.505132                                                              | 54.46                  |
| Et-1                              | 2211.5                                 | 182.92                           | 329.98                                                                      | -34.156                                                                             | 10.4       | -518.493242                                                              | 44.20                  |
| Et-2                              | 2211.7                                 | 180.44                           | 325.48                                                                      | -32.728                                                                             | 10.1       | -518.491868                                                              | 10.31                  |
| Et-3                              | 2211.4                                 | 179.88                           | 324.51                                                                      | -25.065                                                                             | 7.7        | -518.493269                                                              | 45.48                  |
| F                                 | 2211.0                                 | 181.88                           | 328.18                                                                      | -30.585                                                                             | 9.3        | -539.166739                                                              | 100.00                 |

|                     |        |        |        |         |      |              |        |
|---------------------|--------|--------|--------|---------|------|--------------|--------|
| H                   | 2211.8 | 177.02 | 319.29 | -31.134 | 9.8  | -439.907080  | 100.00 |
| iPr-1               | 2211.5 | 181.49 | 327.40 | -32.435 | 9.9  | -557.783547  | 43.70  |
| iPr-2               | 2211.5 | 183.38 | 330.80 | -26.738 | 8.1  | -557.783786  | 56.30  |
| Me                  | 2211.5 | 179.95 | 324.61 | -29.666 | 9.1  | -479.203348  | 100.00 |
| MeS                 | 2211.0 | 188.87 | 340.79 | -38.066 | 11.2 | -877.408711  | 100.00 |
| MeSO <sub>2</sub>   | 2210.4 | 203.76 | 367.75 | -37.343 | 10.2 | -1027.802896 | 100.00 |
| NH <sub>2</sub>     | 2211.0 | 177.87 | 320.95 | -27.447 | 8.6  | -495.261729  | 100.00 |
| NHNH <sub>2</sub>   | 2211.2 | 179.34 | 323.56 | -32.820 | 10.1 | -550.570357  | 100.00 |
| NMe <sub>2</sub>    | 2210.8 | 181.47 | 327.45 | -29.851 | 9.1  | -573.822075  | 100.00 |
| NO-1                | 2210.5 | 199.70 | 360.41 | -39.114 | 10.9 | -569.225270  | 37.18  |
| NO-2                | 2210.0 | 203.34 | 367.05 | -25.942 | 7.1  | -569.225765  | 62.82  |
| NO <sub>2</sub>     | 2209.8 | 202.39 | 365.38 | -33.724 | 9.2  | -644.445853  | 100.00 |
| OCF <sub>3</sub> -1 | 2211.2 | 188.29 | 339.71 | -28.243 | 8.3  | -852.222424  | 26.18  |
| OCF <sub>3</sub> -2 | 2210.4 | 187.86 | 339.06 | -32.961 | 9.7  | -852.222247  | 21.70  |
| OCF <sub>3</sub> -3 | 2210.6 | 188.82 | 340.76 | -28.632 | 8.4  | -852.223074  | 52.12  |
| OH-1                | 2211.0 | 177.93 | 321.04 | -30.162 | 9.4  | -515.141485  | 59.09  |
| OH-2                | 2211.1 | 179.24 | 323.40 | -27.266 | 8.4  | -515.141138  | 40.91  |
| OMe-1               | 2211.5 | 180.49 | 325.59 | -23.750 | 7.3  | -554.416020  | 43.13  |
| OMe-2               | 2211.1 | 178.92 | 322.81 | -33.895 | 10.5 | -554.416281  | 56.87  |
| SH-1                | 2210.8 | 189.61 | 342.16 | -31.421 | 9.2  | -838.121079  | 47.57  |
| SH-2                | 2210.8 | 190.57 | 343.89 | -28.398 | 8.3  | -838.121171  | 52.43  |
| SiH <sub>3</sub>    | 2211.3 | 183.86 | 331.70 | 80.327  | 24.2 | -730.604573  | 100.00 |
| SiMe <sub>3</sub>   | 2211.2 | 187.33 | 337.97 | -30.182 | 8.9  | -848.518066  | 100.00 |

|       |        |        |        |         |      |             |        |
|-------|--------|--------|--------|---------|------|-------------|--------|
| tBu   | 2211.5 | 184.27 | 332.42 | -29.753 | 9.0  | -597.070541 | 100.00 |
| Vin-1 | 2211.1 | 194.10 | 350.21 | -19.258 | 5.5  | -517.285522 | 54.23  |
| Vin-2 | 2211.3 | 189.61 | 342.06 | -41.357 | 12.1 | -517.285362 | 45.77  |

**TABLE S3.** Spectral parameters of  $\nu(\text{CH})$  mode in CN-IND with energetics of the conformers.

| <b>Substituent-<br/>Conformer</b> | <b>Frequency<br/>[cm<sup>-1</sup>]</b> | <b>IR intensity<br/>[km/mol]</b> | <b>dipole strength<br/>[10<sup>-40</sup> esu<sup>2</sup>cm<sup>2</sup>]</b> | <b>rotational<br/>strength<br/>[10<sup>-44</sup> esu<sup>2</sup>cm<sup>2</sup>]</b> | <b>R/D</b> | <b>Sum of electronic and<br/>thermal Free<br/>Energies<br/>[Hartree]</b> | <b>% of population</b> |
|-----------------------------------|----------------------------------------|----------------------------------|-----------------------------------------------------------------------------|-------------------------------------------------------------------------------------|------------|--------------------------------------------------------------------------|------------------------|
| BF <sub>2</sub>                   | 3010.8                                 | 0.55                             | 0.73                                                                        | 1.061                                                                               | 144.9      | -664.044660                                                              | 100.00                 |
| Br                                | 3010.8                                 | 0.24                             | 0.32                                                                        | 0.680                                                                               | 212.2      | -3013.509236                                                             | 100.00                 |
| CHO-1                             | 3010.2                                 | 0.50                             | 0.66                                                                        | 1.056                                                                               | 160.4      | -553.275490                                                              | 61.90                  |
| CHO-2                             | 3010.5                                 | 0.67                             | 0.89                                                                        | 1.032                                                                               | 116.4      | -553.275032                                                              | 38.10                  |
| Cl                                | 3010.7                                 | 0.24                             | 0.32                                                                        | 0.655                                                                               | 206.7      | -899.571723                                                              | 100.00                 |
| COCH <sub>3</sub> -1              | 3010.7                                 | 0.49                             | 0.65                                                                        | 1.023                                                                               | 157.7      | -592.574952                                                              | 38.55                  |
| COCH <sub>3</sub> -2              | 3010.1                                 | 0.41                             | 0.54                                                                        | 1.118                                                                               | 206.4      | -592.575392                                                              | 61.45                  |
| CONH <sub>2</sub> -1              | 3012.4                                 | 0.37                             | 0.50                                                                        | 0.953                                                                               | 192.3      | -608.652785                                                              | 33.72                  |
| CONH <sub>2</sub> -2              | 3009.6                                 | 0.36                             | 0.48                                                                        | 1.083                                                                               | 225.0      | -608.653423                                                              | 66.28                  |
| COOCH <sub>3</sub> -1             | 3010.8                                 | 0.44                             | 0.58                                                                        | 1.047                                                                               | 181.4      | -667.815360                                                              | 43.65                  |
| COOCH <sub>3</sub> -2             | 3010.3                                 | 0.41                             | 0.55                                                                        | 1.086                                                                               | 199.3      | -667.815601                                                              | 56.35                  |
| COOH-1                            | 3010.7                                 | 0.51                             | 0.68                                                                        | 1.025                                                                               | 150.7      | -628.538830                                                              | 45.85                  |
| COOH-2                            | 3010.5                                 | 0.49                             | 0.64                                                                        | 1.054                                                                               | 163.6      | -628.538987                                                              | 54.15                  |
| Et-1                              | 3010.3                                 | 0.33                             | 0.44                                                                        | 0.801                                                                               | 180.8      | -518.527153                                                              | 42.61                  |
| Et-2                              | 3010.2                                 | 0.38                             | 0.50                                                                        | 0.845                                                                               | 168.8      | -518.525732                                                              | 9.46                   |
| Et-3                              | 3010.4                                 | 0.34                             | 0.45                                                                        | 0.796                                                                               | 177.0      | -518.527264                                                              | 47.93                  |
| F                                 | 3011.0                                 | 0.26                             | 0.34                                                                        | 0.590                                                                               | 174.2      | -539.200550                                                              | 100.00                 |



|                      |        |      |      |        |       |              |        |
|----------------------|--------|------|------|--------|-------|--------------|--------|
| H                    | 3011.1 | 0.31 | 0.41 | 1.007  | 247.7 | -439.940965  | 100.00 |
| iPr-1                | 3010.2 | 0.34 | 0.45 | 0.798  | 177.4 | -557.817476  | 52.36  |
| iPr-2                | 3010.4 | 0.35 | 0.47 | 0.750  | 159.9 | -557.817387  | 47.64  |
| Me                   | 3010.2 | 0.35 | 0.47 | 0.803  | 171.0 | -479.237175  | 100.00 |
| MeS-1                | 3008.2 | 0.49 | 0.65 | 0.222  | 34.2  | -877.442501  | 53.81  |
| MeS-2                | 3008.8 | 0.39 | 0.52 | 0.036  | 7.0   | -877.442357  | 46.19  |
| MeSO <sub>2</sub> -1 | 3009.7 | 0.66 | 0.87 | 1.037  | 118.8 | -1027.836697 | 36.03  |
| MeSO <sub>2</sub> -2 | 3013.3 | 0.71 | 0.94 | 0.905  | 95.8  | -1027.837239 | 63.97  |
| NH <sub>2</sub>      | 3005.9 | 1.18 | 1.57 | -0.551 | 35.2  | -495.295515  | 100.00 |
| NHNH <sub>2</sub> -1 | 3006.2 | 1.30 | 1.73 | -0.407 | 23.5  | -550.604154  | 35.86  |
| NHNH <sub>2</sub> -2 | 3006.6 | 1.19 | 1.58 | -0.599 | 38.0  | -550.604703  | 64.14  |
| NMe <sub>2</sub> -1  | 3004.5 | 1.91 | 2.54 | -0.777 | 30.6  | -573.855889  | 50.82  |
| NMe <sub>2</sub> -2  | 3004.6 | 1.62 | 2.15 | -0.948 | 44.0  | -573.855858  | 49.18  |
| NO-1                 | 3009.5 | 1.09 | 1.45 | 0.767  | 52.8  | -569.259127  | 40.07  |
| NO-2                 | 3010.1 | 0.72 | 0.95 | 1.448  | 152.6 | -569.259507  | 59.93  |
| NO <sub>2</sub> -1   | 3011.1 | 0.92 | 1.22 | 1.008  | 82.3  | -644.479658  | 49.97  |
| NO <sub>2</sub> -2   | 3011.1 | 0.92 | 1.22 | 1.009  | 82.4  | -644.479659  | 50.03  |
| OCF <sub>3</sub> -1  | 3011.3 | 0.24 | 0.32 | 0.552  | 173.6 | -852.256190  | 23.70  |
| OCF <sub>3</sub> -2  | 3011.1 | 0.23 | 0.30 | 0.537  | 179.2 | -852.256087  | 21.25  |
| OCF <sub>3</sub> -3  | 3011.9 | 0.32 | 0.42 | 0.801  | 191.5 | -852.256986  | 55.06  |
| OH-1                 | 3008.6 | 0.55 | 0.73 | 0.183  | 25.1  | -515.175261  | 57.80  |
| OH-2                 | 3009.0 | 0.48 | 0.64 | 0.107  | 16.7  | -515.174964  | 42.20  |
| OMe-1                | 3008.8 | 3.70 | 4.91 | -8.624 | 175.6 | -554.449898  | 46.64  |

|                     |        |      |      |       |       |             |        |
|---------------------|--------|------|------|-------|-------|-------------|--------|
| OMe-2               | 3008.3 | 0.92 | 1.21 | 0.935 | 77.0  | -554.450025 | 53.36  |
| SH-1                | 3008.9 | 0.31 | 0.41 | 0.269 | 66.5  | -838.154955 | 48.89  |
| SH-2                | 3009.3 | 0.30 | 0.39 | 0.249 | 63.5  | -838.154997 | 51.11  |
| SiH <sub>3</sub> -1 | 3010.8 | 0.29 | 0.39 | 0.968 | 248.1 | -730.638443 | 49.97  |
| SiH <sub>3</sub> -2 | 3010.8 | 0.29 | 0.39 | 0.968 | 248.1 | -730.638444 | 50.03  |
| SiMe <sub>3</sub>   | 3010.4 | 0.31 | 0.41 | 1.030 | 254.0 | -848.551657 | 100.00 |
| tBu-1               | 3010.4 | 0.35 | 0.47 | 0.825 | 175.4 | -597.104273 | 33.27  |
| tBu-2               | 3010.4 | 0.36 | 0.48 | 0.838 | 173.6 | -597.104270 | 33.17  |
| tBu-3               | 3010.4 | 0.35 | 0.47 | 0.863 | 183.4 | -597.104281 | 33.56  |
| Vin-1               | 3009.0 | 0.27 | 0.36 | 0.566 | 158.1 | -517.319332 | 53.54  |
| Vin-2               | 3009.0 | 0.27 | 0.36 | 0.713 | 198.2 | -517.319198 | 46.46  |

TABLE S4. Spectral parameters of  $\nu(\text{CH})$  mode in NC-IND with energetics of the conformers.

| Substituent-<br>Conformer | Frequency<br>[cm <sup>-1</sup> ] | IR intensity<br>[km/mol] | dipole strength<br>[10 <sup>-40</sup> esu <sup>2</sup> cm <sup>2</sup> ] | rotational<br>strength<br>[10 <sup>-44</sup> esu <sup>2</sup> cm <sup>2</sup> ] | R/D  | Sum of electronic and<br>thermal Free<br>Energies<br>[Hartree] | % of population |
|---------------------------|----------------------------------|--------------------------|--------------------------------------------------------------------------|---------------------------------------------------------------------------------|------|----------------------------------------------------------------|-----------------|
| BF <sub>2</sub>           | 3015.9                           | 3.49                     | 4.61                                                                     | 3.145                                                                           | 68.2 | -664.010806                                                    | 100.00          |
| Br                        | 3017.2                           | 3.30                     | 4.36                                                                     | 2.103                                                                           | 48.2 | -3013.475412                                                   | 100.00          |
| CHO-1                     | 3015.8                           | 3.37                     | 4.46                                                                     | 3.153                                                                           | 70.8 | -553.241701                                                    | 63.46           |
| CHO-2                     | 3015.4                           | 4.02                     | 5.31                                                                     | 2.801                                                                           | 52.7 | -553.241180                                                    | 36.54           |
| Cl                        | 3017.2                           | 3.33                     | 4.40                                                                     | 2.034                                                                           | 46.2 | -899.537904                                                    | 100.00          |
| COCH <sub>3</sub> -1      | 3015.0                           | 3.48                     | 4.61                                                                     | 2.785                                                                           | 60.5 | -592.541058                                                    | 37.53           |
| COCH <sub>3</sub> -2      | 3015.4                           | 3.43                     | 4.53                                                                     | 3.381                                                                           | 74.6 | -592.541539                                                    | 62.47           |
| CONH <sub>2</sub> -1      | 3017.8                           | 3.29                     | 4.35                                                                     | 2.889                                                                           | 66.4 | -608.618933                                                    | 34.10           |
| CONH <sub>2</sub> -2      | 3015.4                           | 3.53                     | 4.67                                                                     | 3.105                                                                           | 66.5 | -608.619555                                                    | 65.90           |
| COOCH <sub>3</sub> -1     | 3016.0                           | 3.46                     | 4.58                                                                     | 2.991                                                                           | 65.3 | -667.781509                                                    | 44.88           |
| COOCH <sub>3</sub> -2     | 3015.3                           | 3.46                     | 4.57                                                                     | 3.246                                                                           | 71.0 | -667.781703                                                    | 55.12           |
| COOH-1                    | 3015.9                           | 3.46                     | 4.57                                                                     | 2.965                                                                           | 64.9 | -628.504963                                                    | 45.54           |
| COOH-2                    | 3016.0                           | 3.44                     | 4.55                                                                     | 3.125                                                                           | 68.7 | -628.505132                                                    | 54.46           |
| Et-1                      | 3016.5                           | 3.70                     | 4.90                                                                     | 2.493                                                                           | 50.9 | -518.493242                                                    | 44.20           |
| Et-2                      | 3017.2                           | 3.79                     | 5.02                                                                     | 2.261                                                                           | 45.1 | -518.491868                                                    | 10.31           |
| Et-3                      | 3016.7                           | 3.73                     | 4.94                                                                     | 2.497                                                                           | 50.6 | -518.493269                                                    | 45.48           |
| F                         | 3017.7                           | 3.46                     | 4.58                                                                     | 1.988                                                                           | 43.4 | -539.166739                                                    | 100.00          |

|                     |        |      |      |        |      |              |        |
|---------------------|--------|------|------|--------|------|--------------|--------|
| H                   | 3017.6 | 3.70 | 4.89 | 2.959  | 60.6 | -439.907080  | 100.00 |
| iPr-1               | 3016.1 | 3.73 | 4.94 | 2.562  | 51.9 | -557.783547  | 43.70  |
| iPr-2               | 3016.6 | 3.73 | 4.94 | 2.421  | 49.0 | -557.783786  | 56.30  |
| Me                  | 3017.0 | 3.81 | 5.04 | 2.439  | 48.4 | -479.203348  | 100.00 |
| MeS                 | 3016.2 | 3.82 | 5.06 | 1.265  | 25.0 | -877.408711  | 100.00 |
| MeSO <sub>2</sub>   | 3014.3 | 3.64 | 4.82 | 2.913  | 60.5 | -1027.802896 | 100.00 |
| NH <sub>2</sub>     | 3014.5 | 4.89 | 6.47 | -0.220 | 3.4  | -495.261729  | 100.00 |
| NHNH <sub>2</sub>   | 3015.0 | 5.04 | 6.67 | 0.115  | 1.7  | -550.570357  | 100.00 |
| NMe <sub>2</sub>    | 3013.7 | 5.76 | 7.62 | -0.380 | 5.0  | -573.822075  | 100.00 |
| NO-1                | 3014.2 | 3.80 | 5.03 | 2.374  | 47.2 | -569.225270  | 37.18  |
| NO-2                | 3015.8 | 3.33 | 4.41 | 3.960  | 89.9 | -569.225765  | 62.82  |
| NO <sub>2</sub>     | 3015.9 | 3.51 | 4.64 | 2.957  | 63.7 | -644.445853  | 100.00 |
| OCF <sub>3</sub> -1 | 3017.5 | 3.33 | 4.40 | 1.607  | 36.6 | -852.222424  | 26.18  |
| OCF <sub>3</sub> -2 | 3017.6 | 3.28 | 4.34 | 1.736  | 40.0 | -852.222247  | 21.70  |
| OCF <sub>3</sub> -3 | 3017.5 | 3.28 | 4.34 | 2.399  | 55.3 | -852.223074  | 52.12  |
| OH-1                | 3016.7 | 4.04 | 5.35 | 1.219  | 22.8 | -515.141485  | 59.09  |
| OH-2                | 3016.6 | 3.95 | 5.22 | 0.925  | 17.7 | -515.141138  | 40.91  |
| OMe-1               | 3016.0 | 4.09 | 5.41 | 1.400  | 25.9 | -554.416020  | 43.13  |
| OMe-2               | 3017.0 | 4.17 | 5.52 | 0.675  | 12.2 | -554.416281  | 56.87  |
| SH-1                | 3016.3 | 3.56 | 4.71 | 1.202  | 25.5 | -838.121079  | 47.57  |
| SH-2                | 3016.5 | 3.54 | 4.68 | 1.072  | 22.9 | -838.121171  | 52.43  |
| SiH <sub>3</sub>    | 3017.2 | 3.51 | 4.64 | 2.808  | 60.5 | -730.604573  | 100.00 |
| SiMe <sub>3</sub>   | 3016.3 | 3.61 | 4.78 | 3.064  | 64.1 | -848.518066  | 100.00 |

|       |        |      |      |       |      |             |        |
|-------|--------|------|------|-------|------|-------------|--------|
| tBu   | 3017.0 | 3.69 | 4.88 | 2.816 | 57.7 | -597.070541 | 100.00 |
| Vin-1 | 3016.0 | 3.53 | 4.67 | 1.726 | 37.0 | -517.285522 | 54.23  |
| Vin-2 | 3015.4 | 3.58 | 4.74 | 2.003 | 42.2 | -517.285362 | 45.77  |

**TABLE S5.** EDTM, MDTM and  $\cos(\xi)$  of the examined modes in CN-IND with energetics of the conformers.

| <b>Substituent-Conformer</b> | <b>v(CN) EDTM</b> | <b>v(CN) MDTM</b> | <b>v(CN) <math>\cos(\xi)</math></b> | <b>v(CH) EDTM</b> | <b>v(CH) MDTM</b> | <b>v(CH) <math>\cos(\xi)</math></b> | <b>% of population</b> |
|------------------------------|-------------------|-------------------|-------------------------------------|-------------------|-------------------|-------------------------------------|------------------------|
| BF <sub>2</sub>              | 5.314             | 8.285             | -0.056                              | 0.858             | 1.447             | 0.857                               | 100.00                 |
| Br                           | 5.558             | 9.173             | -0.052                              | 0.566             | 1.422             | 0.845                               | 100.00                 |
| CHO-1                        | 5.376             | 7.043             | -0.063                              | 0.788             | 1.551             | 0.832                               | 61.90                  |
| CHO-2                        | 5.294             | 7.455             | -0.069                              | 0.940             | 1.309             | 0.838                               | 38.10                  |
| Cl                           | 5.504             | 7.532             | -0.064                              | 0.563             | 1.377             | 0.845                               | 100.00                 |
| COCH <sub>3</sub> -1         | 5.504             | 8.291             | -0.056                              | 0.805             | 1.342             | 0.947                               | 38.55                  |
| COCH <sub>3</sub> -2         | 5.552             | 8.494             | -0.056                              | 0.734             | 1.596             | 0.951                               | 61.45                  |
| CONH <sub>2</sub> -1         | 5.540             | 8.386             | -0.053                              | 0.705             | 1.397             | 0.969                               | 33.72                  |
| CONH <sub>2</sub> -2         | 5.575             | 8.449             | -0.064                              | 0.694             | 1.578             | 0.990                               | 66.28                  |
| COOCH <sub>3</sub> -1        | 5.585             | 9.197             | -0.048                              | 0.759             | 1.439             | 0.957                               | 43.65                  |
| COOCH <sub>3</sub> -2        | 5.338             | 8.048             | -0.062                              | 0.749             | 1.256             | 0.979                               | 56.35                  |
| COOH-1                       | 5.603             | 9.716             | -0.049                              | 0.739             | 1.508             | 0.976                               | 45.85                  |
| COOH-2                       | 5.433             | 9.700             | -0.037                              | 0.707             | 1.254             | 0.986                               | 54.15                  |
| Et-1                         | 5.399             | 8.192             | -0.057                              | 0.825             | 1.389             | 0.895                               | 42.61                  |
| Et-2                         | 5.426             | 8.272             | -0.055                              | 0.803             | 1.455             | 0.902                               | 9.46                   |
| Et-3                         | 5.207             | 7.929             | -0.058                              | 0.852             | 1.352             | 0.872                               | 47.93                  |
| F                            | 6.042             | 7.805             | -0.080                              | 0.666             | 1.965             | 0.614                               | 100.00                 |
| H                            | 6.008             | 8.665             | -0.066                              | 0.707             | 2.106             | 0.567                               | 100.00                 |
| iPr-1                        | 5.968             | 8.838             | -0.044                              | 0.671             | 1.850             | 0.642                               | 52.36                  |

|                      |       |        |        |       |       |        |        |
|----------------------|-------|--------|--------|-------|-------|--------|--------|
| iPr-2                | 5.418 | 6.566  | -0.081 | 0.581 | 1.449 | 0.699  | 47.64  |
| Me                   | 5.685 | 5.895  | -0.094 | 0.638 | 1.669 | 0.946  | 100.00 |
| MeS-1                | 6.051 | 9.654  | -0.057 | 0.671 | 2.049 | 0.581  | 53.81  |
| MeS-2                | 6.066 | 9.016  | -0.048 | 0.685 | 1.963 | 0.558  | 46.19  |
| MeSO <sub>2</sub> -1 | 5.936 | 7.105  | -0.071 | 0.685 | 1.812 | 0.646  | 36.03  |
| MeSO <sub>2</sub> -2 | 6.036 | 9.410  | -0.069 | 0.806 | 2.257 | 0.122  | 63.97  |
| NH <sub>2</sub>      | 6.092 | 8.592  | -0.043 | 0.718 | 1.959 | 0.026  | 100.00 |
| NHNH <sub>2</sub> -1 | 5.188 | 8.993  | -0.057 | 0.934 | 1.220 | 0.910  | 35.86  |
| NHNH <sub>2</sub> -2 | 5.268 | 9.694  | -0.033 | 0.972 | 1.233 | 0.755  | 64.14  |
| NMe <sub>2</sub> -1  | 6.155 | 7.058  | -0.083 | 1.251 | 2.328 | -0.189 | 50.82  |
| NMe <sub>2</sub> -2  | 6.303 | 8.447  | -0.083 | 1.316 | 2.864 | -0.108 | 49.18  |
| NO-1                 | 6.414 | 8.473  | -0.056 | 1.255 | 2.579 | -0.185 | 40.07  |
| NO-2                 | 6.525 | 9.348  | -0.068 | 1.593 | 3.114 | -0.157 | 59.93  |
| NO <sub>2</sub> -1   | 6.501 | 9.707  | -0.052 | 1.468 | 3.485 | -0.185 | 49.97  |
| NO <sub>2</sub> -2   | 5.112 | 7.233  | -0.076 | 1.203 | 0.907 | 0.701  | 50.03  |
| OCF <sub>3</sub> -1  | 5.106 | 6.543  | -0.060 | 0.974 | 1.864 | 0.798  | 23.70  |
| OCF <sub>3</sub> -2  | 4.970 | 7.536  | -0.057 | 1.110 | 1.458 | 0.624  | 21.25  |
| OCF <sub>3</sub> -3  | 4.969 | 7.536  | -0.057 | 1.107 | 1.456 | 0.625  | 55.06  |
| OH-1                 | 5.424 | 9.235  | -0.052 | 0.564 | 1.363 | 0.718  | 57.80  |
| OH-2                 | 5.358 | 10.612 | -0.051 | 0.548 | 1.638 | 0.599  | 42.20  |
| OMe-1                | 5.233 | 10.584 | -0.040 | 0.647 | 1.288 | 0.962  | 46.64  |
| OMe-2                | 5.821 | 6.905  | -0.085 | 0.857 | 1.883 | 0.118  | 53.36  |
| SH-1                 | 5.800 | 6.825  | -0.079 | 0.799 | 1.794 | 0.076  | 48.89  |

|                     |       |        |        |       |       |        |        |
|---------------------|-------|--------|--------|-------|-------|--------|--------|
| SH-2                | 2.263 | 6.927  | -0.563 | 6.034 | 7.924 | -0.060 | 51.11  |
| SiH <sub>3</sub> -1 | 1.102 | 2.719  | 1.253  | 5.974 | 8.410 | -0.076 | 49.97  |
| SiH <sub>3</sub> -2 | 5.844 | 7.842  | -0.069 | 0.637 | 1.733 | 0.245  | 50.03  |
| SiMe <sub>3</sub>   | 5.834 | 7.763  | -0.060 | 0.626 | 1.696 | 0.234  | 100.00 |
| tBu-1               | 5.742 | 8.016  | -0.058 | 0.625 | 1.580 | 0.981  | 33.27  |
| tBu-2               | 5.742 | 8.016  | -0.058 | 0.625 | 1.580 | 0.981  | 33.17  |
| tBu-3               | 6.077 | 10.949 | -0.042 | 0.637 | 2.153 | 0.751  | 33.56  |
| Vin-1               | 6.109 | 10.008 | -0.046 | 0.683 | 2.265 | 0.541  | 53.54  |
| Vin-2               | 6.193 | 10.073 | -0.003 | 0.682 | 2.444 | 0.484  | 46.46  |



**TABLE S6.** EDTM, MDTM and  $\cos(\xi)$  of the examined modes in NC-IND with energetics of the conformers.

| <b>Substituent-Conformer</b> | <b>v(NC) EDTM</b> | <b>v(NC) MDTM</b> | <b>v(NC) <math>\cos(\xi)</math></b> | <b>v(CH) EDTM</b> | <b>v(CH) MDTM</b> | <b>v(CH) <math>\cos(\xi)</math></b> | <b>% of population</b> |
|------------------------------|-------------------|-------------------|-------------------------------------|-------------------|-------------------|-------------------------------------|------------------------|
| BF <sub>2</sub>              | 18.547            | 29.309            | -0.060                              | 2.149             | 3.592             | 0.408                               | 100.00                 |
| Br                           | 18.678            | 32.476            | -0.052                              | 2.088             | 4.854             | 0.207                               | 100.00                 |
| CHO-1                        | 18.775            | 25.411            | -0.062                              | 2.107             | 3.038             | 0.494                               | 63.46                  |
| CHO-2                        | 18.788            | 26.319            | -0.070                              | 2.163             | 2.998             | 0.417                               | 36.54                  |
| Cl                           | 18.532            | 26.192            | -0.064                              | 2.098             | 3.700             | 0.262                               | 100.00                 |
| COCH <sub>3</sub> -1         | 18.758            | 29.028            | -0.059                              | 2.147             | 3.782             | 0.343                               | 37.53                  |
| COCH <sub>3</sub> -2         | 18.629            | 29.315            | -0.060                              | 2.129             | 3.967             | 0.400                               | 62.47                  |
| CONH <sub>2</sub> -1         | 18.609            | 29.010            | -0.058                              | 2.119             | 3.838             | 0.362                               | 34.10                  |
| CONH <sub>2</sub> -2         | 18.538            | 28.850            | -0.064                              | 2.161             | 4.065             | 0.353                               | 65.90                  |
| COOCH <sub>3</sub> -1        | 18.703            | 32.260            | -0.051                              | 2.139             | 4.480             | 0.312                               | 44.88                  |
| COOCH <sub>3</sub> -2        | 18.607            | 33.340            | -0.054                              | 2.139             | 4.653             | 0.326                               | 55.12                  |
| COOH-1                       | 18.683            | 28.901            | -0.060                              | 2.138             | 3.597             | 0.385                               | 45.54                  |
| COOH-2                       | 18.644            | 29.059            | -0.060                              | 2.133             | 3.674             | 0.399                               | 54.46                  |
| Et-1                         | 18.165            | 24.814            | -0.076                              | 2.213             | 4.432             | 0.254                               | 44.20                  |
| Et-2                         | 18.041            | 26.979            | -0.067                              | 2.240             | 4.598             | 0.219                               | 10.31                  |
| Et-3                         | 18.014            | 27.320            | -0.051                              | 2.222             | 4.304             | 0.262                               | 45.48                  |
| F                            | 18.116            | 22.210            | -0.076                              | 2.140             | 3.124             | 0.297                               | 100.00                 |
| H                            | 17.871            | 18.357            | -0.096                              | 2.209             | 2.521             | 0.529                               | 100.00                 |
| iPr-1                        | 18.094            | 29.928            | -0.060                              | 2.222             | 5.115             | 0.225                               | 43.70                  |

|                     |        |        |        |       |       |        |        |
|---------------------|--------|--------|--------|-------|-------|--------|--------|
| iPr-2               | 18.188 | 28.722 | -0.051 | 2.222 | 4.994 | 0.218  | 56.30  |
| Me                  | 18.017 | 22.349 | -0.074 | 2.245 | 3.580 | 0.304  | 100.00 |
| MeS                 | 18.461 | 30.480 | -0.068 | 2.249 | 5.368 | 0.105  | 100.00 |
| MeSO <sub>2</sub>   | 19.178 | 34.621 | -0.056 | 2.195 | 4.510 | 0.294  | 100.00 |
| NH <sub>2</sub>     | 17.915 | 21.959 | -0.070 | 2.545 | 4.330 | -0.020 | 100.00 |
| NHNH <sub>2</sub>   | 17.988 | 25.879 | -0.071 | 2.582 | 5.441 | 0.008  | 100.00 |
| NMe <sub>2</sub>    | 18.099 | 28.589 | -0.058 | 2.765 | 6.207 | -0.026 | 100.00 |
| NO-1                | 18.982 | 26.405 | -0.078 | 2.248 | 2.866 | 0.373  | 37.18  |
| NO-2                | 19.159 | 25.137 | -0.054 | 2.099 | 3.249 | 0.581  | 62.82  |
| NO <sub>2</sub>     | 19.115 | 29.162 | -0.061 | 2.154 | 3.036 | 0.452  | 100.00 |
| OCF <sub>3</sub> -1 | 18.431 | 33.762 | -0.045 | 2.096 | 5.249 | 0.146  | 26.18  |
| OCF <sub>3</sub> -2 | 18.414 | 37.313 | -0.048 | 2.084 | 5.745 | 0.145  | 21.70  |
| OCF <sub>3</sub> -3 | 18.460 | 37.866 | -0.041 | 2.084 | 5.150 | 0.224  | 52.12  |
| OH-1                | 17.918 | 22.148 | -0.076 | 2.313 | 3.776 | 0.140  | 59.09  |
| OH-2                | 17.983 | 21.999 | -0.069 | 2.286 | 3.716 | 0.109  | 40.91  |
| OMe-1               | 18.044 | 25.213 | -0.052 | 2.327 | 4.578 | 0.131  | 43.13  |
| OMe-2               | 17.967 | 26.593 | -0.071 | 2.349 | 4.872 | 0.059  | 56.87  |
| SH-1                | 18.498 | 26.229 | -0.065 | 2.170 | 4.297 | 0.129  | 47.57  |
| SH-2                | 18.544 | 26.115 | -0.059 | 2.163 | 4.275 | 0.116  | 52.43  |
| SiH <sub>3</sub>    | 18.213 | 22.578 | 0.195  | 2.154 | 3.836 | 0.340  | 100.00 |
| SiMe <sub>3</sub>   | 18.384 | 35.164 | -0.047 | 2.186 | 6.047 | 0.232  | 100.00 |
| tBu                 | 18.233 | 31.865 | -0.051 | 2.210 | 5.722 | 0.223  | 100.00 |
| Vin-1               | 18.715 | 24.926 | -0.041 | 2.161 | 3.944 | 0.203  | 54.23  |

|       |        |        |        |       |       |       |       |
|-------|--------|--------|--------|-------|-------|-------|-------|
| Vin-2 | 18.495 | 26.490 | -0.084 | 2.178 | 4.033 | 0.228 | 45.77 |
|-------|--------|--------|--------|-------|-------|-------|-------|

## Correlations of spectral parameters of selected modes with substituent constants

**Figure S1.** A non-linear correlation is found for  $\nu(\text{NC})$  (NC-IND) frequency. Infrared intensity depends on  $\sigma_p$ . a)  $\nu = -1.07 (\pm 0.23) \sigma_p^2 - 0.61 (\pm 0.12) \sigma_p + 2211.17 (\pm 0.07)$ ,  $r = 0.84$ ,  $r^2 = 0.71$ ,  $n = 27$ . ( $\text{SiH}_3$  excluded due to coupling of  $\nu(\text{NC})$  and  $\nu(\text{SiH})$ .) b)  $I_{\text{IR}} = 8.27 (\pm 2.97) \sigma_p^2 + 14.44 (\pm 1.58) \sigma_p + 185.07 (\pm 0.86)$ ,  $r = 0.90$ ,  $r^2 = 0.82$ ,  $n = 27$ . ( $\text{SiH}_3$  excluded).

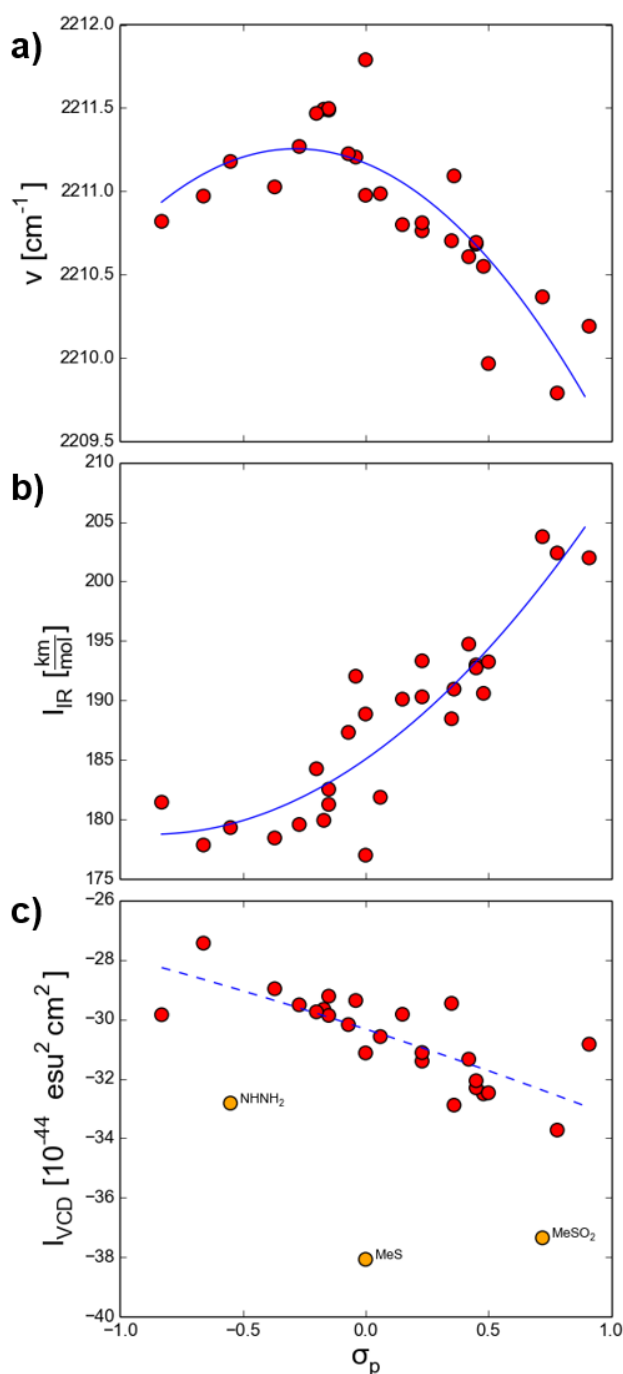

exclusion of apparent outliers, the correlation has low statistical parameters  $r^2=0.59$ ,  $r=0.76$ .

**Figure S2.** Correlations of  $\nu(\text{CH})$  (CN-IND) spectral parameters a)  $\nu = -3.82 (\pm 0.67)\sigma_p^2 + 3.49 (\pm 0.36)\sigma_p + 3010.17 (\pm 0.19)$ ,  $r=0.90$ ,  $r^2=0.81$ ,  $n=28$  b)  $I_{\text{IR}} = 1.45 (\pm 0.09)\sigma_p^2 - 0.46 (\pm 0.05)\sigma_p + 0.31 (\pm 0.03)$ ,  $r=0.96$ ,  $r^2=0.92$ ,  $n=27$  – OMe excluded due to coupling of  $\nu(\text{CH})$  in the chiral center with the  $\nu(\text{CH})$  in OMe group.

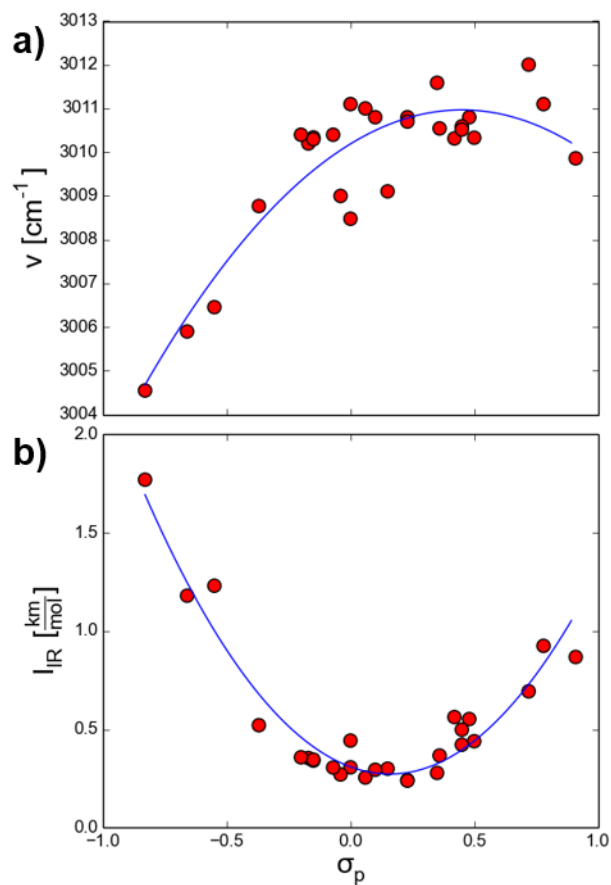

**Figure S3.** Correlations of  $\nu(\text{CH})$  (NC-IND) spectral parameters a) frequency has no significant correlation with  $\sigma_p$  b)  $I_{\text{IR}} = 1.98 (\pm 0.17)\sigma_p^2 - 1.59 (\pm 0.09)\sigma_p + 4.77 (\pm 0.05)$ ,  $r=0.97$ ,  $r^2=0.93$ ,  $n=28$ .

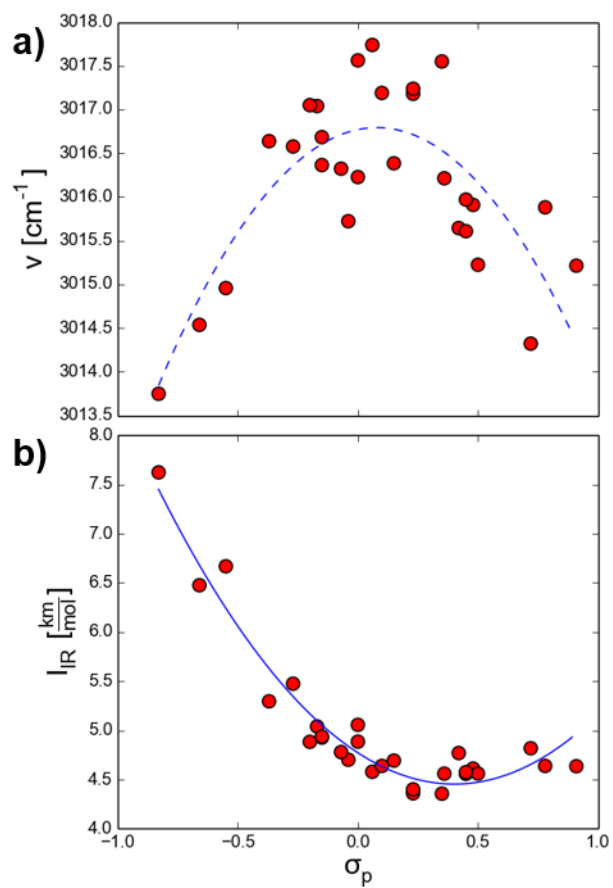

**Figure S4.** In  $v(\text{CN})$  (CN-IND) EDTM correlates well with  $\sigma_p$  while other factors do not. a)

$$\text{EDTM} = -0.83 (\pm 0.07) \sigma_p + 5.80 (\pm 0.03), \quad r = 0.92, \quad r^2 = 0.84, \quad n = 28$$

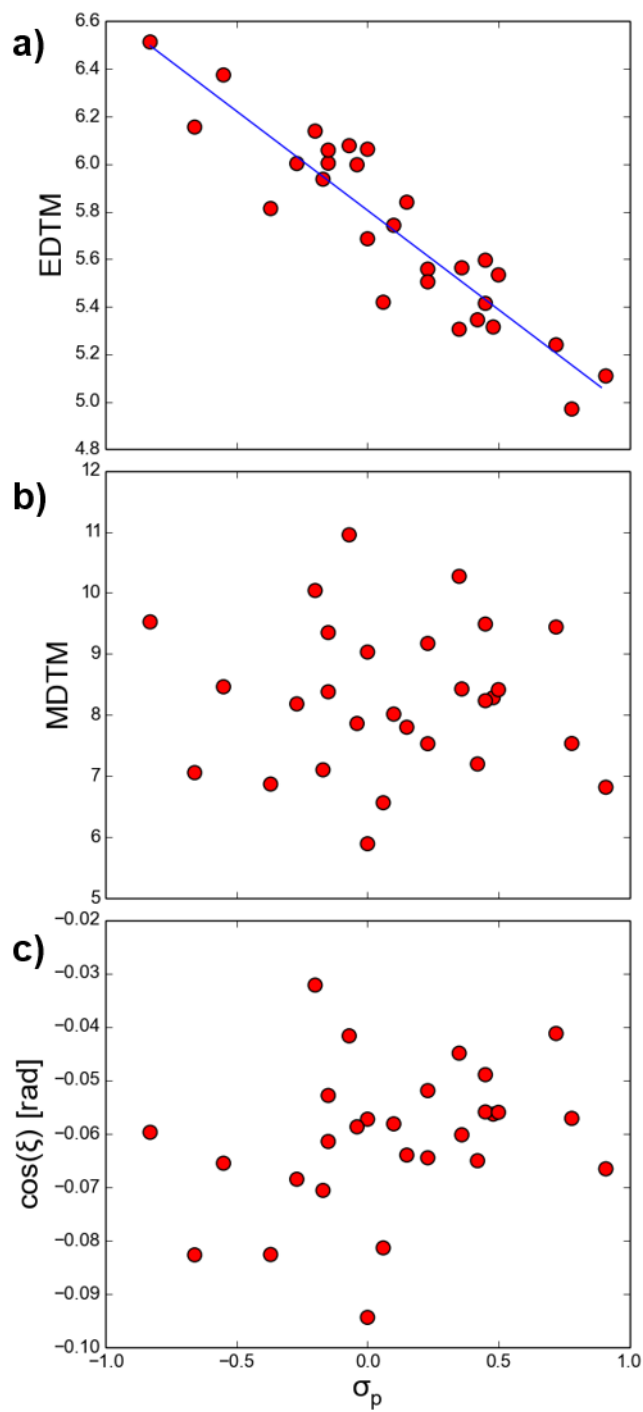

**Figure S5.** In  $v(\text{NC})$  (NC-IND) EDTM also correlates well with  $\sigma_p$  while other factors do not.

a)  $\text{EDTM} = 0.42 (\pm 0.14) \sigma_p^2 + 0.71 (\pm 0.08) \sigma_p + 18.27 (\pm 0.04)$ ,  $r = 0.90$ ,  $r^2 = 0.81$ ,  $n = 28$

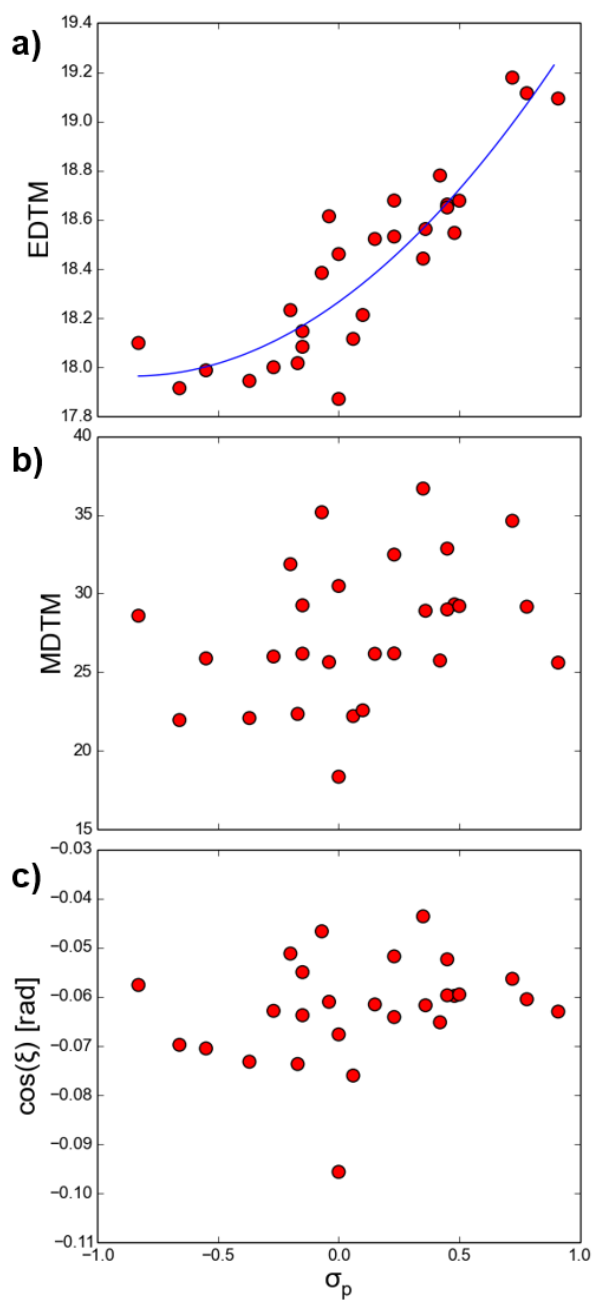



**Figure S6.** EDTM in  $\nu(\text{CH})$  (CN-IND) correlates well with  $\sigma_p$ .  $\text{EDTM} = 0.99 (\pm 0.07) \sigma_p^2 - 0.27 (\pm 0.04) \sigma_p + 0.65 (\pm 0.02)$ ,  $r = 0.95$ ,  $r^2 = 0.91$ ,  $n = 27$  (OMe excluded).

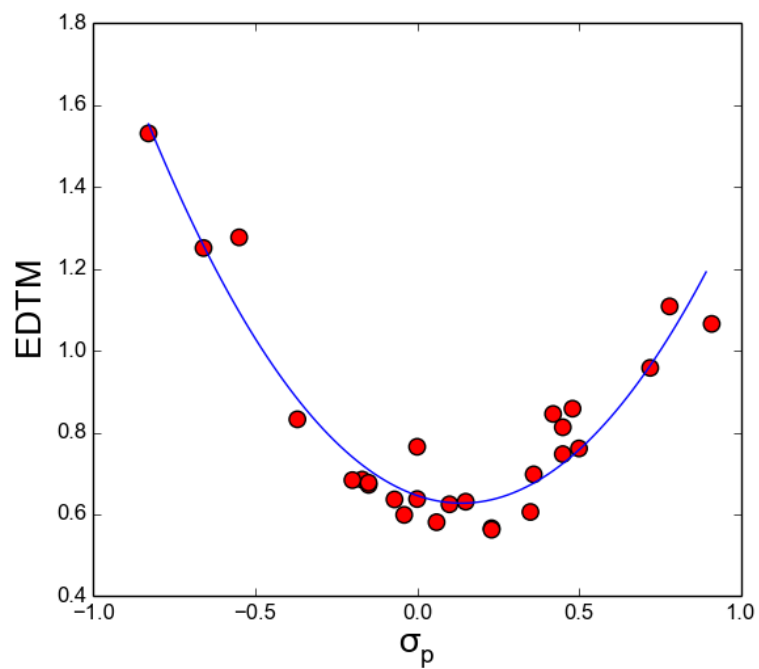

**Figure S7.** EDTM in  $\nu(\text{CH})$  (NC-IND) also correlates well with  $\sigma_p$ , while no correlation is found for MDTM. a)  $\text{EDTM} = 0.41 (\pm 0.03) \sigma_p^2 - 0.34 (\pm 0.02) \sigma_p + 2.18 (\pm 0.01)$ ,  $r = 0.97$ ,  $r^2 = 0.94$ ,  $n = 28$ .

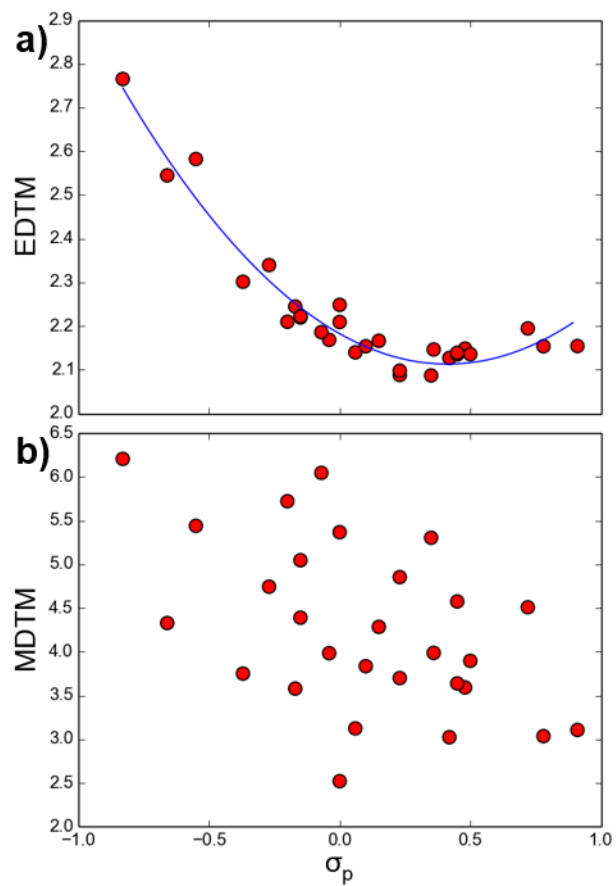

## Gaussian 09 input headings

Geometry optimization and harmonic frequencies

```
# opt=tight b3lyp/aug-cc-pvdz freq
```

VCD spectra and EDTM/MDTM details

```
# freq=vcd b3lyp/aug-cc-pvdz IOP(7/33=1)
```

## Full Gaussian 09 citation

*Gaussian 09, Revision B.01*, Frisch, M. J.; Trucks, G. W.; Schlegel, H. B.; Scuseria, G. E.; Robb, M. A.; Cheeseman, J. R.; Scalmani, G.; Barone, V.; Mennucci, B.; Petersson, G. A.; Nakatsuji, H.; Caricato, M.; Li, X.; Hratchian, H. P.; Izmaylov, A. F.; Bloino, J.; Zheng, G.; Sonnenberg, J. L.; Hada, M.; Ehara, M.; Toyota, K.; Fukuda, R.; Hasegawa, J.; Ishida, M.; Nakajima, T.; Honda, Y.; Kitao, O.; Nakai, H.; Vreven, T.; Montgomery, J. A., Jr.; Peralta, J. E.; Ogliaro, F.; Bearpark, M.; Heyd, J. J.; Brothers, E.; Kudin, K. N.; Staroverov, V. N.; Kobayashi, R.; Normand, J.; Raghavachari, K.; Rendell, A.; Burant, J. C.; Iyengar, S. S.; Tomasi, J.; Cossi, M.; Rega, N.; Millam, N. J.; Klene, M.; Knox, J. E.; Cross, J. B.; Bakken, V.; Adamo, C.; Jaramillo, J.; Gomperts, R.; Stratmann, R. E.; Yazyev, O.; Austin, A. J.; Cammi, R.; Pomelli, C.; Ochterski, J. W.; Martin, R. L.; Morokuma, K.; Zakrzewski, V. G.; Voth, G. A.; Salvador, P.; Dannenberg, J. J.; Dapprich, S.; Daniels, A. D.; Farkas, Ö.; Foresman, J. B.; Ortiz, J. V.; Cioslowski, J.; Fox, D. J.; Gaussian, Inc., Wallingford CT, **2009**.

## Coordinates and energies of CN-IND

BF<sub>2</sub>-CN-IND

Total energy (hartree): -664.144789

Sum of electronic and thermal Free Energies (hartree): -664.044660

|   |           |           |           |
|---|-----------|-----------|-----------|
| C | 1.512170  | 2.034827  | 0.008671  |
| C | 2.727423  | 1.497857  | -0.215338 |
| C | 2.600711  | 0.006953  | -0.515552 |
| C | 1.103967  | -0.237843 | -0.358783 |
| C | 0.372552  | -1.413251 | -0.475202 |
| C | -1.017150 | -1.345832 | -0.310731 |
| C | -1.668612 | -0.124982 | -0.035458 |
| C | -0.905963 | 1.056029  | 0.084359  |
| C | 0.478197  | 0.994107  | -0.073871 |
| H | 1.313296  | 3.083549  | 0.221851  |
| H | 3.684983  | 2.012380  | -0.210883 |
| H | 0.860836  | -2.366225 | -0.679253 |
| H | -1.609158 | -2.256930 | -0.395864 |
| H | -1.399145 | 2.003553  | 0.301552  |
| H | 2.899260  | -0.187291 | -1.561117 |
| C | 3.438322  | -0.843296 | 0.340255  |
| N | 4.107575  | -1.517597 | 1.006942  |
| B | -3.202587 | -0.079880 | 0.137645  |
| F | -3.850650 | 1.065448  | 0.400514  |
| F | -3.964891 | -1.178099 | 0.032463  |

Br-CN-IND

Total energy (hartree): -3013.600737

Sum of electronic and thermal Free Energies (hartree): -3013.509236

|   |           |           |           |
|---|-----------|-----------|-----------|
| C | -1.861455 | 2.034365  | -0.076026 |
| C | -3.077299 | 1.503960  | 0.161631  |
| C | -2.951532 | 0.024904  | 0.515379  |
| C | -1.454171 | -0.222562 | 0.375259  |
| C | -0.714176 | -1.386086 | 0.535857  |
| C | 0.679018  | -1.328910 | 0.376663  |
| C | 1.289132  | -0.109986 | 0.063591  |
| C | 0.558663  | 1.069712  | -0.107007 |
| C | -0.828465 | 0.997322  | 0.049245  |
| H | -1.662611 | 3.074988  | -0.325850 |
| H | -4.034904 | 2.017889  | 0.133725  |
| H | -1.192887 | -2.336580 | 0.772012  |
| H | 1.282736  | -2.226602 | 0.493672  |
| H | 1.057453  | 2.004586  | -0.355079 |
| H | -3.260732 | -0.130368 | 1.564264  |
| C | -3.785599 | -0.852562 | -0.316656 |
| N | -4.452040 | -1.549605 | -0.962554 |

|    |          |           |           |
|----|----------|-----------|-----------|
| Br | 3.195729 | -0.055360 | -0.143214 |
|----|----------|-----------|-----------|

#### CHO-1-CN-IND

Total energy (hartree): -553.386724

Sum of electronic and thermal Free Energies (hartree): -553.275490

|   |           |           |           |
|---|-----------|-----------|-----------|
| C | 0.974809  | 2.037859  | 0.022432  |
| C | 2.225391  | 1.595433  | -0.212556 |
| C | 2.211478  | 0.101294  | -0.522732 |
| C | 0.739196  | -0.258494 | -0.357068 |
| C | 0.101788  | -1.486203 | -0.473437 |
| C | -1.288242 | -1.525848 | -0.295815 |
| C | -2.013727 | -0.357491 | -0.010941 |
| C | -1.359845 | 0.882986  | 0.110544  |
| C | 0.021173  | 0.922944  | -0.059562 |
| H | 0.698430  | 3.067022  | 0.243770  |
| H | 3.141100  | 2.181374  | -0.211218 |
| H | 0.660083  | -2.397654 | -0.686414 |
| H | -1.818582 | -2.475823 | -0.377629 |
| H | -1.944590 | 1.773860  | 0.336950  |
| H | 2.516732  | -0.062061 | -1.571664 |
| C | 3.117527  | -0.689243 | 0.320668  |
| N | 3.840130  | -1.317325 | 0.976692  |
| C | -3.484973 | -0.448637 | 0.164710  |
| H | -3.907242 | -1.475591 | 0.057023  |
| O | -4.211788 | 0.495318  | 0.406859  |

#### CHO-2-CN-IND

Total energy (hartree): -553.386220

Sum of electronic and thermal Free Energies (hartree): -553.275032

|   |           |           |           |
|---|-----------|-----------|-----------|
| C | -1.271430 | 2.028217  | -0.091761 |
| C | -2.442456 | 1.423264  | 0.188019  |
| C | -2.210253 | -0.043360 | 0.538887  |
| C | -0.705688 | -0.197480 | 0.348081  |
| C | 0.104304  | -1.321037 | 0.489686  |
| C | 1.479840  | -1.178771 | 0.286225  |
| C | 2.027837  | 0.072340  | -0.053340 |
| C | 1.203636  | 1.200397  | -0.200503 |
| C | -0.170676 | 1.059373  | -0.000775 |
| H | -1.147940 | 3.078526  | -0.349436 |
| H | -3.431321 | 1.874688  | 0.192764  |
| H | -0.318973 | -2.292733 | 0.744372  |
| H | 2.151605  | -2.030486 | 0.384714  |
| H | 1.639447  | 2.164389  | -0.468533 |
| H | -2.467997 | -0.215412 | 1.599144  |
| C | -3.013700 | -0.977192 | -0.260780 |
| N | -3.655832 | -1.716912 | -0.883214 |

|   |          |           |           |
|---|----------|-----------|-----------|
| C | 3.490806 | 0.215379  | -0.263855 |
| H | 3.825008 | 1.244663  | -0.536500 |
| O | 4.298460 | -0.686504 | -0.157915 |

#### Cl-CN-IND

Total energy (hartree): -899.664910

Sum of electronic and thermal Free Energies (hartree): -899.571723

|    |           |           |           |
|----|-----------|-----------|-----------|
| C  | -1.177463 | 2.034751  | -0.077010 |
| C  | -2.392451 | 1.514249  | 0.185779  |
| C  | -2.271836 | 0.033311  | 0.533327  |
| C  | -0.780044 | -0.226448 | 0.360681  |
| C  | -0.046713 | -1.396711 | 0.502839  |
| C  | 1.342518  | -1.351225 | 0.313425  |
| C  | 1.955959  | -0.137043 | -0.010755 |
| C  | 1.232712  | 1.049414  | -0.162839 |
| C  | -0.150858 | 0.988750  | 0.023549  |
| H  | -0.975320 | 3.074269  | -0.328817 |
| H  | -3.345928 | 2.036507  | 0.179794  |
| H  | -0.528582 | -2.343371 | 0.747519  |
| H  | 1.945320  | -2.251532 | 0.414254  |
| H  | 1.738665  | 1.977992  | -0.420180 |
| H  | -2.560686 | -0.122078 | 1.587975  |
| C  | -3.130678 | -0.834747 | -0.283328 |
| N  | -3.816336 | -1.524545 | -0.916794 |
| Cl | 3.703177  | -0.102693 | -0.239823 |

#### COCH<sub>3</sub>-1-CN-IND

Total energy (hartree): -592.711713

Sum of electronic and thermal Free Energies (hartree): -592.574952

|   |           |           |           |
|---|-----------|-----------|-----------|
| C | 1.442930  | 2.039870  | -0.018255 |
| C | 2.672302  | 1.532274  | -0.234379 |
| C | 2.584035  | 0.034715  | -0.514893 |
| C | 1.093933  | -0.245557 | -0.357691 |
| C | 0.387304  | -1.438697 | -0.461373 |
| C | -1.001442 | -1.404607 | -0.300854 |
| C | -1.676533 | -0.197036 | -0.040624 |
| C | -0.950287 | 1.003074  | 0.067967  |
| C | 0.436708  | 0.971348  | -0.088865 |
| H | 1.217914  | 3.086117  | 0.181411  |
| H | 3.616069  | 2.071708  | -0.235262 |
| H | 0.896571  | -2.383078 | -0.654039 |
| H | -1.592200 | -2.315966 | -0.373121 |
| H | -1.454121 | 1.946108  | 0.272833  |
| H | 2.891177  | -0.165810 | -1.556759 |
| C | 3.441714  | -0.780284 | 0.355351  |
| N | 4.127912  | -1.425425 | 1.033580  |

|   |           |           |           |
|---|-----------|-----------|-----------|
| C | -3.172339 | -0.238196 | 0.115961  |
| O | -3.778648 | -1.292245 | 0.002651  |
| C | -3.915454 | 1.050225  | 0.416700  |
| H | -3.754564 | 1.790122  | -0.380830 |
| H | -4.983577 | 0.828262  | 0.497807  |
| H | -3.560692 | 1.495705  | 1.357426  |

COCH<sub>3</sub>-2-CN-IND

Total energy (hartree): -592.712179

Sum of electronic and thermal Free Energies (hartree): -592.575392

|   |           |           |           |
|---|-----------|-----------|-----------|
| C | 1.548419  | 2.025480  | 0.024287  |
| C | 2.748979  | 1.459582  | -0.207745 |
| C | 2.584727  | -0.025378 | -0.520527 |
| C | 1.083127  | -0.233169 | -0.360119 |
| C | 0.318770  | -1.385008 | -0.480339 |
| C | -1.069458 | -1.283121 | -0.307940 |
| C | -1.679383 | -0.048130 | -0.023263 |
| C | -0.891476 | 1.111950  | 0.100731  |
| C | 0.487593  | 1.012049  | -0.063166 |
| H | 1.376544  | 3.076970  | 0.246550  |
| H | 3.719177  | 1.949978  | -0.202252 |
| H | 0.777450  | -2.350521 | -0.693247 |
| H | -1.674229 | -2.183426 | -0.397127 |
| H | -1.381192 | 2.058009  | 0.325767  |
| H | 2.876378  | -0.217219 | -1.568456 |
| C | 3.403388  | -0.904225 | 0.324888  |
| N | 4.056670  | -1.603216 | 0.982024  |
| C | -3.166879 | 0.081154  | 0.160071  |
| O | -3.666663 | 1.171453  | 0.392313  |
| C | -4.035356 | -1.158079 | 0.052878  |
| H | -3.739063 | -1.909162 | 0.799333  |
| H | -5.077959 | -0.870597 | 0.217430  |
| H | -3.935195 | -1.621766 | -0.939206 |

CONH<sub>2</sub>-1-CN-IND

Total energy (hartree): -608.779655

Sum of electronic and thermal Free Energies (hartree): -608.652785

|   |           |           |           |
|---|-----------|-----------|-----------|
| C | 1.472841  | 2.026654  | -0.139152 |
| C | 2.692199  | 1.483754  | -0.324291 |
| C | 2.575869  | -0.026043 | -0.514486 |
| C | 1.080055  | -0.267671 | -0.345190 |
| C | 0.347729  | -1.447221 | -0.398234 |
| C | -1.042682 | -1.375966 | -0.251073 |
| C | -1.687525 | -0.145541 | -0.040749 |
| C | -0.939236 | 1.043478  | 0.009529  |
| C | 0.446906  | 0.975008  | -0.144227 |

|   |           |           |           |
|---|-----------|-----------|-----------|
| H | 1.268010  | 3.087229  | -0.003469 |
| H | 3.645914  | 2.004467  | -0.356168 |
| H | 0.835529  | -2.410723 | -0.546475 |
| H | -1.653817 | -2.275267 | -0.301064 |
| H | -1.427693 | 2.010226  | 0.130189  |
| H | 2.883278  | -0.295460 | -1.540433 |
| C | 3.415018  | -0.801014 | 0.408993  |
| N | 4.086134  | -1.414625 | 1.130272  |
| C | -3.186636 | -0.169442 | 0.098144  |
| O | -3.863270 | -1.088696 | -0.347230 |
| N | -3.760305 | 0.909162  | 0.727105  |
| H | -4.753443 | 0.844904  | 0.903838  |
| H | -3.219644 | 1.506460  | 1.334208  |

#### CONH<sub>2</sub>-2-CN-IND

Total energy (hartree): -608.779990

Sum of electronic and thermal Free Energies (hartree): -608.653423

|   |           |           |           |
|---|-----------|-----------|-----------|
| C | 1.501292  | 2.027786  | -0.089421 |
| C | 2.711279  | 1.472206  | -0.296751 |
| C | 2.572856  | -0.030336 | -0.527493 |
| C | 1.076199  | -0.255855 | -0.346464 |
| C | 0.331566  | -1.426191 | -0.390138 |
| C | -1.057701 | -1.339077 | -0.218556 |
| C | -1.687059 | -0.100076 | -0.006316 |
| C | -0.920886 | 1.075874  | 0.056264  |
| C | 0.459825  | 0.991481  | -0.115336 |
| H | 1.310801  | 3.086381  | 0.076975  |
| H | 3.672280  | 1.979744  | -0.322889 |
| H | 0.806978  | -2.396223 | -0.535386 |
| H | -1.638095 | -2.261028 | -0.216656 |
| H | -1.424944 | 2.021693  | 0.247014  |
| H | 2.862573  | -0.272313 | -1.565568 |
| C | 3.413150  | -0.847380 | 0.357600  |
| N | 4.084050  | -1.499007 | 1.044982  |
| C | -3.173419 | 0.042683  | 0.194775  |
| O | -3.660473 | 1.049253  | 0.697472  |
| N | -3.955531 | -1.015527 | -0.192178 |
| H | -4.955320 | -0.884338 | -0.130102 |
| H | -3.612731 | -1.732901 | -0.811775 |

#### COOCH<sub>3</sub>-1-CN-IND

Total energy (hartree): -667.956046

Sum of electronic and thermal Free Energies (hartree): -667.815360

|   |          |          |           |
|---|----------|----------|-----------|
| C | 1.745122 | 2.058457 | -0.048614 |
| C | 3.001406 | 1.604956 | -0.226469 |
| C | 2.989287 | 0.100824 | -0.484761 |



|   |           |           |           |
|---|-----------|-----------|-----------|
| C | 1.510105  | -0.246262 | -0.357972 |
| C | 0.863539  | -1.472076 | -0.457456 |
| C | -0.530019 | -1.500754 | -0.328797 |
| C | -1.258251 | -0.319701 | -0.105453 |
| C | -0.598619 | 0.917334  | -0.000807 |
| C | 0.790622  | 0.943886  | -0.125244 |
| H | 1.466707  | 3.095770  | 0.128238  |
| H | 3.919205  | 2.187377  | -0.213851 |
| H | 1.419597  | -2.394889 | -0.622108 |
| H | -1.074760 | -2.440404 | -0.398242 |
| H | -1.166809 | 1.827744  | 0.175999  |
| H | 3.330293  | -0.100940 | -1.515751 |
| C | 3.862463  | -0.660623 | 0.417994  |
| N | 4.561422  | -1.263518 | 1.121644  |
| C | -2.742982 | -0.434669 | 0.017270  |
| O | -3.360754 | -1.476919 | -0.073346 |
| O | -3.339763 | 0.759061  | 0.242425  |
| C | -4.774276 | 0.717536  | 0.371537  |
| H | -5.228558 | 0.330231  | -0.548340 |
| H | -5.062566 | 0.076816  | 1.213433  |
| H | -5.079312 | 1.752334  | 0.549109  |

COOCH<sub>3</sub>-2-CN-IND

Total energy (hartree): -667.956200

Sum of electronic and thermal Free Energies (hartree): -667.815601

|   |           |           |           |
|---|-----------|-----------|-----------|
| C | 2.047273  | 1.996164  | 0.043181  |
| C | 3.222080  | 1.376074  | -0.182534 |
| C | 2.990113  | -0.096968 | -0.507871 |
| C | 1.478601  | -0.234699 | -0.363194 |
| C | 0.661631  | -1.349133 | -0.501725 |
| C | -0.721292 | -1.186959 | -0.343536 |
| C | -1.267268 | 0.075499  | -0.053727 |
| C | -0.434273 | 1.198283  | 0.090012  |
| C | 0.941352  | 1.034398  | -0.062003 |
| H | 1.923153  | 3.052916  | 0.272162  |
| H | 4.214223  | 1.819974  | -0.164412 |
| H | 1.077636  | -2.332928 | -0.718808 |
| H | -1.382218 | -2.044457 | -0.443805 |
| H | -0.879452 | 2.164948  | 0.319072  |
| H | 3.282318  | -0.295208 | -1.554442 |
| C | 3.758904  | -1.018654 | 0.338715  |
| N | 4.373923  | -1.750581 | 0.996928  |
| C | -2.737464 | 0.280853  | 0.116977  |
| O | -3.253299 | 1.353739  | 0.362225  |
| O | -3.446042 | -0.861463 | -0.031430 |
| C | -4.872401 | -0.728751 | 0.123639  |

|   |           |           |           |
|---|-----------|-----------|-----------|
| H | -5.113515 | -0.359317 | 1.127540  |
| H | -5.273604 | -0.032694 | -0.622723 |
| H | -5.274800 | -1.734016 | -0.027033 |

COOH-1-CN-IND

Total energy (hartree): -628.654413

Sum of electronic and thermal Free Energies (hartree): -628.538830

|   |           |           |           |
|---|-----------|-----------|-----------|
| C | 1.455188  | 2.036300  | 0.004994  |
| C | 2.676653  | 1.514005  | -0.220161 |
| C | 2.567716  | 0.021162  | -0.517785 |
| C | 1.074542  | -0.241290 | -0.358560 |
| C | 0.354765  | -1.424592 | -0.472594 |
| C | -1.033959 | -1.376176 | -0.307282 |
| C | -1.683287 | -0.159904 | -0.033775 |
| C | -0.950519 | 1.033911  | 0.086444  |
| C | 0.434228  | 0.982583  | -0.074663 |
| H | 1.243896  | 3.082829  | 0.216928  |
| H | 3.627742  | 2.040452  | -0.217886 |
| H | 0.851533  | -2.373041 | -0.676311 |
| H | -1.635064 | -2.280023 | -0.386586 |
| H | -1.459637 | 1.970614  | 0.302486  |
| H | 2.867689  | -0.170880 | -1.563346 |
| C | 3.417414  | -0.816579 | 0.338525  |
| N | 4.097029  | -1.480391 | 1.005237  |
| C | -3.164781 | -0.186181 | 0.125045  |
| O | -3.857792 | -1.178089 | 0.030031  |
| O | -3.693627 | 1.038553  | 0.393637  |
| H | -4.651756 | 0.909641  | 0.477580  |

COOH-2-CN-IND

Total energy (hartree): -628.654584

Sum of electronic and thermal Free Energies (hartree): -628.538987

|   |           |           |           |
|---|-----------|-----------|-----------|
| C | 1.505487  | 2.034123  | 0.021843  |
| C | 2.713287  | 1.483840  | -0.210137 |
| C | 2.568136  | -0.003549 | -0.519862 |
| C | 1.069509  | -0.231465 | -0.358313 |
| C | 0.321866  | -1.395609 | -0.477798 |
| C | -1.066797 | -1.317041 | -0.307645 |
| C | -1.684625 | -0.086559 | -0.024648 |
| C | -0.922090 | 1.087744  | 0.100669  |
| C | 0.459092  | 1.006146  | -0.063496 |
| H | 1.319658  | 3.083593  | 0.242432  |
| H | 3.676864  | 1.987075  | -0.206069 |
| H | 0.795447  | -2.354199 | -0.689274 |
| H | -1.675118 | -2.214354 | -0.393176 |
| H | -1.423661 | 2.027571  | 0.324848  |

|   |           |           |           |
|---|-----------|-----------|-----------|
| H | 2.860593  | -0.193523 | -1.567924 |
| C | 3.399608  | -0.869506 | 0.326231  |
| N | 4.063871  | -1.556999 | 0.984397  |
| C | -3.159550 | 0.024673  | 0.156692  |
| O | -3.752115 | 1.056509  | 0.398480  |
| O | -3.807201 | -1.163483 | 0.023612  |
| H | -4.749881 | -0.978148 | 0.160425  |

Et-1-CN-IND

Total energy (hartree): -518.683180

Sum of electronic and thermal Free Energies (hartree): -518.527153

|   |           |           |           |
|---|-----------|-----------|-----------|
| C | -1.191809 | 2.029706  | -0.115288 |
| C | -2.390815 | 1.545552  | 0.265452  |
| C | -2.276010 | 0.063243  | 0.612166  |
| C | -0.812814 | -0.235745 | 0.304492  |
| C | -0.096952 | -1.422384 | 0.382428  |
| C | 1.267236  | -1.401593 | 0.056531  |
| C | 1.916515  | -0.219238 | -0.339510 |
| C | 1.174135  | 0.971342  | -0.419541 |
| C | -0.185800 | 0.958850  | -0.101076 |
| H | -0.988811 | 3.062329  | -0.394530 |
| H | -3.326650 | 2.093131  | 0.344259  |
| H | -0.577874 | -2.356397 | 0.674384  |
| H | 1.838037  | -2.330169 | 0.104192  |
| H | 1.658646  | 1.896080  | -0.737576 |
| H | -2.472432 | -0.080993 | 1.689348  |
| C | -3.228702 | -0.784393 | -0.117299 |
| N | -3.988640 | -1.456862 | -0.681217 |
| C | 3.399460  | -0.222662 | -0.645342 |
| H | 3.683767  | -1.200911 | -1.059356 |
| H | 3.612485  | 0.524454  | -1.423941 |
| C | 4.265263  | 0.074181  | 0.591936  |
| H | 5.332942  | 0.064731  | 0.331756  |
| H | 4.024344  | 1.060178  | 1.012806  |
| H | 4.097784  | -0.675573 | 1.377486  |

Et-2-CN-IND

Total energy (hartree): -518.682039

Sum of electronic and thermal Free Energies (hartree): -518.525732

|   |           |           |           |
|---|-----------|-----------|-----------|
| C | 1.453207  | 2.007711  | 0.102010  |
| C | 2.606569  | 1.368471  | -0.176800 |
| C | 2.330136  | -0.088560 | -0.540068 |
| C | 0.819591  | -0.192815 | -0.358709 |
| C | -0.038259 | -1.270671 | -0.506628 |
| C | -1.414320 | -1.070195 | -0.299901 |
| C | -1.934052 | 0.186499  | 0.047854  |

|   |           |           |           |
|---|-----------|-----------|-----------|
| C | -1.045500 | 1.268956  | 0.196925  |
| C | 0.320800  | 1.077128  | -0.001222 |
| H | 1.364250  | 3.059833  | 0.367804  |
| H | 3.609193  | 1.788792  | -0.172327 |
| H | 0.335756  | -2.260978 | -0.767873 |
| H | -2.084020 | -1.920709 | -0.412281 |
| H | -1.430051 | 2.252970  | 0.471687  |
| H | 2.597222  | -0.262921 | -1.597364 |
| C | 3.099205  | -1.048617 | 0.263217  |
| N | 3.714644  | -1.810854 | 0.886098  |
| C | -3.418521 | 0.425352  | 0.273304  |
| H | -3.545955 | 0.855909  | 1.279030  |
| H | -3.748349 | 1.211765  | -0.424079 |
| C | -4.337481 | -0.788995 | 0.128750  |
| H | -5.378805 | -0.497271 | 0.318882  |
| H | -4.291913 | -1.215483 | -0.883080 |
| H | -4.078083 | -1.581515 | 0.844527  |

#### Et-3-CN-IND

Total energy (hartree): -518.683178

Sum of electronic and thermal Free Energies (hartree): -518.527264

|   |           |           |           |
|---|-----------|-----------|-----------|
| C | 1.238871  | 2.024733  | 0.147271  |
| C | 2.463592  | 1.486290  | -0.016925 |
| C | 2.345371  | 0.026023  | -0.445701 |
| C | 0.837441  | -0.200613 | -0.435501 |
| C | 0.091753  | -1.337801 | -0.714137 |
| C | -1.307174 | -1.247985 | -0.662487 |
| C | -1.961424 | -0.046190 | -0.340035 |
| C | -1.190212 | 1.095064  | -0.061029 |
| C | 0.203391  | 1.013192  | -0.104576 |
| H | 1.036503  | 3.057223  | 0.427423  |
| H | 3.422806  | 1.981744  | 0.110622  |
| H | 0.572683  | -2.284138 | -0.963263 |
| H | -1.903707 | -2.134884 | -0.881473 |
| H | -1.680649 | 2.038082  | 0.186257  |
| H | 2.736825  | -0.090530 | -1.471792 |
| C | 3.097878  | -0.899712 | 0.411547  |
| N | 3.701728  | -1.633777 | 1.078037  |
| C | -3.472407 | 0.007685  | -0.257149 |
| H | -3.818562 | 1.005666  | -0.564117 |
| H | -3.901793 | -0.709525 | -0.971702 |
| C | -4.005888 | -0.301645 | 1.152897  |
| H | -5.103626 | -0.253562 | 1.173035  |
| H | -3.701246 | -1.306326 | 1.476880  |
| H | -3.618483 | 0.418443  | 1.886826  |

### F-CN-IND

Total energy (hartree): -539.295927

Sum of electronic and thermal Free Energies (hartree): -539.200550

|   |           |           |           |
|---|-----------|-----------|-----------|
| C | -0.747922 | 2.035557  | -0.077439 |
| C | -1.961209 | 1.528785  | 0.218503  |
| C | -1.848542 | 0.045277  | 0.557108  |
| C | -0.365345 | -0.231806 | 0.341645  |
| C | 0.355949  | -1.412952 | 0.460332  |
| C | 1.739645  | -1.385531 | 0.231530  |
| C | 2.344603  | -0.176001 | -0.105270 |
| C | 1.647180  | 1.022465  | -0.236015 |
| C | 0.268499  | 0.977570  | -0.009808 |
| H | -0.540886 | 3.073560  | -0.331590 |
| H | -2.908011 | 2.062619  | 0.241437  |
| H | -0.133246 | -2.352794 | 0.716275  |
| H | 2.347160  | -2.285679 | 0.308480  |
| H | 2.171038  | 1.937755  | -0.506212 |
| H | -2.111844 | -0.110567 | 1.618313  |
| C | -2.740657 | -0.807681 | -0.239772 |
| N | -3.452175 | -1.485890 | -0.857119 |
| F | 3.687534  | -0.166416 | -0.321306 |

### H-CN-IND

Total energy (hartree): -440.045876

Sum of electronic and thermal Free Energies (hartree): -439.940965

|   |           |           |           |
|---|-----------|-----------|-----------|
| C | -0.278688 | 2.029888  | -0.085174 |
| C | -1.497144 | 1.566587  | 0.257273  |
| C | -1.423711 | 0.076969  | 0.581348  |
| C | 0.039364  | -0.252184 | 0.302358  |
| C | 0.718144  | -1.460990 | 0.384864  |
| C | 2.091920  | -1.473766 | 0.097013  |
| C | 2.758792  | -0.295015 | -0.261820 |
| C | 2.071456  | 0.922070  | -0.347976 |
| C | 0.702092  | 0.936328  | -0.066758 |
| H | -0.045254 | 3.062124  | -0.341047 |
| H | -2.422394 | 2.133604  | 0.322820  |
| H | 0.201906  | -2.382497 | 0.655439  |
| H | 2.644822  | -2.411744 | 0.151013  |
| H | 2.594539  | 1.835507  | -0.631917 |
| H | -1.645544 | -0.079890 | 1.651829  |
| C | -2.378104 | -0.738468 | -0.181496 |
| N | -3.139889 | -1.385320 | -0.772127 |
| H | 3.826424  | -0.328380 | -0.481051 |

### iPr-1-CN-IND

Total energy (hartree): -557.999806

Sum of electronic and thermal Free Energies (hartree): -557.817476

|   |           |           |           |
|---|-----------|-----------|-----------|
| C | 1.718988  | 2.007553  | 0.260592  |
| C | 2.891598  | 1.424013  | -0.058004 |
| C | 2.655492  | -0.003940 | -0.543670 |
| C | 1.147027  | -0.160829 | -0.387729 |
| C | 0.318555  | -1.247653 | -0.636661 |
| C | -1.059744 | -1.099764 | -0.429321 |
| C | -1.617196 | 0.112334  | 0.018729  |
| C | -0.763259 | 1.198814  | 0.266619  |
| C | 0.613424  | 1.059222  | 0.067683  |
| H | 1.599147  | 3.031163  | 0.611683  |
| H | 3.882788  | 1.867631  | -0.007756 |
| H | 0.722939  | -2.201760 | -0.975999 |
| H | -1.710569 | -1.953155 | -0.619914 |
| H | -1.176400 | 2.145748  | 0.617761  |
| H | 2.934794  | -0.082740 | -1.609270 |
| C | 3.442158  | -1.008353 | 0.184614  |
| N | 4.071783  | -1.804467 | 0.748074  |
| C | -3.117891 | 0.248010  | 0.239014  |
| H | -3.295007 | 1.276973  | 0.588249  |
| C | -3.625111 | -0.703908 | 1.337485  |
| H | -4.694285 | -0.535432 | 1.528134  |
| H | -3.498830 | -1.755308 | 1.042913  |
| H | -3.080056 | -0.550013 | 2.278223  |
| C | -3.910548 | 0.064301  | -1.067880 |
| H | -3.798309 | -0.955575 | -1.462167 |
| H | -4.981608 | 0.240587  | -0.895619 |
| H | -3.568046 | 0.764352  | -1.841585 |

iPr-2-CN-IND

Total energy (hartree): -557.999849

Sum of electronic and thermal Free Energies (hartree): -557.817387

|   |           |           |           |
|---|-----------|-----------|-----------|
| C | 1.402608  | 2.021681  | 0.155879  |
| C | 2.659173  | 1.603535  | -0.094670 |
| C | 2.654107  | 0.135920  | -0.515174 |
| C | 1.179292  | -0.234995 | -0.401390 |
| C | 0.529725  | -1.440298 | -0.621614 |
| C | -0.865032 | -1.484438 | -0.466956 |
| C | -1.609921 | -0.351359 | -0.100271 |
| C | -0.932410 | 0.861301  | 0.122438  |
| C | 0.454406  | 0.913729  | -0.024903 |
| H | 1.121523  | 3.031417  | 0.450771  |
| H | 3.572213  | 2.190556  | -0.034885 |
| H | 1.080173  | -2.339796 | -0.898719 |
| H | -1.386026 | -2.428111 | -0.634406 |
| H | -1.482466 | 1.756860  | 0.412747  |

|   |           |           |           |
|---|-----------|-----------|-----------|
| H | 2.984981  | 0.050580  | -1.565348 |
| C | 3.548784  | -0.706996 | 0.289401  |
| N | 4.264535  | -1.374649 | 0.913621  |
| C | -3.121272 | -0.444758 | 0.060059  |
| H | -3.402388 | -1.480799 | -0.183247 |
| C | -3.863566 | 0.476605  | -0.924744 |
| H | -4.950085 | 0.336002  | -0.837696 |
| H | -3.646322 | 1.535037  | -0.721949 |
| H | -3.572752 | 0.265183  | -1.962350 |
| C | -3.560047 | -0.177983 | 1.511435  |
| H | -3.331193 | 0.853983  | 1.813511  |
| H | -4.643847 | -0.325550 | 1.618925  |
| H | -3.050627 | -0.854478 | 2.210363  |

#### Me-CN-IND

Total energy (hartree): -479.366380

Sum of electronic and thermal Free Energies (hartree): -479.237175

|   |           |           |           |
|---|-----------|-----------|-----------|
| C | 0.785436  | 2.029998  | 0.077798  |
| C | 2.002600  | 1.527264  | -0.209558 |
| C | 1.894969  | 0.043069  | -0.550538 |
| C | 0.409780  | -0.235616 | -0.347096 |
| C | -0.315008 | -1.411161 | -0.472440 |
| C | -1.701151 | -1.368884 | -0.251436 |
| C | -2.360533 | -0.176807 | 0.088903  |
| C | -1.609055 | 1.005681  | 0.215230  |
| C | -0.230560 | 0.971249  | 0.001483  |
| H | 0.576058  | 3.067930  | 0.331657  |
| H | 2.948670  | 2.062699  | -0.224510 |
| H | 0.171076  | -2.353377 | -0.727047 |
| H | -2.280773 | -2.288107 | -0.344351 |
| H | -2.103876 | 1.941051  | 0.482432  |
| H | 2.167263  | -0.113687 | -1.609298 |
| C | 2.781578  | -0.808704 | 0.253703  |
| N | 3.489928  | -1.484724 | 0.877353  |
| C | -3.853241 | -0.156748 | 0.324660  |
| H | -4.087357 | 0.145867  | 1.356037  |
| H | -4.351365 | 0.559510  | -0.345011 |
| H | -4.298088 | -1.144873 | 0.154361  |

#### MeS-1-CN-IND

Total energy (hartree): -877.570634

Sum of electronic and thermal Free Energies (hartree): -877.442501

|   |           |           |           |
|---|-----------|-----------|-----------|
| C | -1.769367 | 2.001767  | -0.073754 |
| C | -2.926119 | 1.360136  | 0.183872  |
| C | -2.657100 | -0.101824 | 0.531980  |
| C | -1.145787 | -0.206493 | 0.365929  |

|   |           |           |           |
|---|-----------|-----------|-----------|
| C | -0.290351 | -1.287837 | 0.507602  |
| C | 1.088421  | -1.095775 | 0.320589  |
| C | 1.599557  | 0.172031  | -0.003990 |
| C | 0.725947  | 1.267693  | -0.151967 |
| C | -0.640229 | 1.067215  | 0.030452  |
| H | -1.674970 | 3.056864  | -0.324967 |
| H | -3.927923 | 1.782432  | 0.173701  |
| H | -0.668092 | -2.281247 | 0.751097  |
| H | 1.752977  | -1.949112 | 0.429504  |
| H | 1.117313  | 2.252078  | -0.409938 |
| H | -2.938382 | -0.287772 | 1.583742  |
| C | -3.419105 | -1.050269 | -0.292068 |
| N | -4.027705 | -1.805055 | -0.930492 |
| S | 3.334631  | 0.513703  | -0.255455 |
| C | 4.135136  | -1.109986 | -0.025791 |
| H | 3.984731  | -1.491059 | 0.991601  |
| H | 3.783444  | -1.837120 | -0.767751 |
| H | 5.204731  | -0.928883 | -0.183398 |

#### MeS-2-CN-IND

Total energy (hartree): -877.570554

Sum of electronic and thermal Free Energies (hartree): -877.442357

|   |           |           |           |
|---|-----------|-----------|-----------|
| C | 1.358557  | 2.033363  | -0.045696 |
| C | 2.625900  | 1.618790  | -0.241884 |
| C | 2.654826  | 0.116143  | -0.507990 |
| C | 1.188187  | -0.271799 | -0.367078 |
| C | 0.562030  | -1.509516 | -0.465177 |
| C | -0.827049 | -1.574852 | -0.317870 |
| C | -1.588373 | -0.413070 | -0.076773 |
| C | -0.953039 | 0.835174  | 0.025424  |
| C | 0.437048  | 0.890810  | -0.117477 |
| H | 1.053066  | 3.061640  | 0.140945  |
| H | 3.525925  | 2.228570  | -0.236454 |
| H | 1.131932  | -2.421803 | -0.642930 |
| H | -1.329590 | -2.539700 | -0.387659 |
| H | -1.517310 | 1.745343  | 0.214493  |
| H | 2.998405  | -0.068444 | -1.541370 |
| C | 3.559858  | -0.618917 | 0.386133  |
| N | 4.283546  | -1.203054 | 1.080888  |
| S | -3.351137 | -0.651777 | 0.082984  |
| C | -3.984877 | 1.026830  | 0.413926  |
| H | -3.572811 | 1.433230  | 1.345677  |
| H | -3.785685 | 1.703930  | -0.425772 |
| H | -5.068977 | 0.909300  | 0.525880  |

#### MeSO<sub>2</sub>-1-CN-IND



Total energy (hartree): -1027.970794

Sum of electronic and thermal Free Energies (hartree): -1027.836697

|   |           |           |           |
|---|-----------|-----------|-----------|
| C | -2.093765 | 2.037860  | -0.096116 |
| C | -3.303922 | 1.511471  | 0.175859  |
| C | -3.171442 | 0.037171  | 0.545005  |
| C | -1.678645 | -0.216777 | 0.369750  |
| C | -0.949248 | -1.390530 | 0.511131  |
| C | 0.438892  | -1.342787 | 0.313941  |
| C | 1.044314  | -0.125495 | -0.012072 |
| C | 0.322973  | 1.061523  | -0.174353 |
| C | -1.059180 | 1.001435  | 0.018807  |
| H | -1.898705 | 3.074237  | -0.364790 |
| H | -4.261640 | 2.025615  | 0.164003  |
| H | -1.436164 | -2.335843 | 0.750093  |
| H | 1.045016  | -2.244378 | 0.383612  |
| H | 0.831064  | 1.978518  | -0.468441 |
| H | -3.447712 | -0.103268 | 1.605305  |
| C | -4.029208 | -0.853266 | -0.247427 |
| N | -4.715388 | -1.560124 | -0.860823 |
| S | 2.844592  | -0.086092 | -0.253076 |
| O | 3.289402  | -1.459134 | -0.633531 |
| O | 3.162980  | 1.093121  | -1.112121 |
| C | 3.501935  | 0.258054  | 1.406914  |
| H | 4.590362  | 0.290512  | 1.287093  |
| H | 3.113397  | 1.225490  | 1.740304  |
| H | 3.203350  | -0.556408 | 2.074368  |

MeSO<sub>2</sub>-2-CN-IND

Total energy (hartree): -1027.971341

Sum of electronic and thermal Free Energies (hartree): -1027.837239

|   |           |           |           |
|---|-----------|-----------|-----------|
| C | 2.108663  | 2.031402  | 0.108176  |
| C | 3.323798  | 1.489252  | -0.103863 |
| C | 3.190018  | 0.019366  | -0.489802 |
| C | 1.685903  | -0.212456 | -0.400686 |
| C | 0.945727  | -1.366537 | -0.624269 |
| C | -0.450715 | -1.297375 | -0.511085 |
| C | -1.052688 | -0.080314 | -0.177760 |
| C | -0.323033 | 1.091481  | 0.045490  |
| C | 1.067035  | 1.010347  | -0.065633 |
| H | 1.914260  | 3.069661  | 0.369904  |
| H | 4.286745  | 1.989452  | -0.038843 |
| H | 1.428088  | -2.309000 | -0.882856 |
| H | -1.070799 | -2.171063 | -0.704148 |
| H | -0.836689 | 2.024370  | 0.272089  |
| H | 3.525586  | -0.121838 | -1.532470 |
| C | 3.982651  | -0.887281 | 0.351034  |

|   |           |           |           |
|---|-----------|-----------|-----------|
| N | 4.613945  | -1.605944 | 1.008211  |
| S | -2.862996 | -0.013682 | -0.038255 |
| O | -3.280904 | 1.406835  | -0.232923 |
| O | -3.430623 | -1.105321 | -0.883525 |
| C | -3.187317 | -0.443644 | 1.697807  |
| H | -4.276833 | -0.408826 | 1.806821  |
| H | -2.804778 | -1.452251 | 1.883425  |
| H | -2.703307 | 0.302463  | 2.335819  |

#### NH<sub>2</sub>-CN-IND

Total energy (hartree): -495.415180

Sum of electronic and thermal Free Energies (hartree): -495.295515

|   |           |           |           |
|---|-----------|-----------|-----------|
| C | -0.768509 | 2.027849  | -0.071869 |
| C | -1.984556 | 1.525283  | 0.220708  |
| C | -1.876929 | 0.039900  | 0.556781  |
| C | -0.394177 | -0.237656 | 0.345557  |
| C | 0.340044  | -1.410969 | 0.463149  |
| C | 1.720643  | -1.374710 | 0.237010  |
| C | 2.373493  | -0.172023 | -0.104160 |
| C | 1.622570  | 1.014060  | -0.225311 |
| C | 0.246740  | 0.967595  | -0.003641 |
| H | -0.560166 | 3.066277  | -0.324974 |
| H | -2.929916 | 2.061961  | 0.240853  |
| H | -0.140183 | -2.356075 | 0.718538  |
| H | 2.303748  | -2.293186 | 0.317113  |
| H | 2.114615  | 1.948753  | -0.498348 |
| H | -2.151838 | -0.118142 | 1.614896  |
| C | -2.769721 | -0.804897 | -0.249191 |
| N | -3.482525 | -1.477656 | -0.871545 |
| N | 3.742075  | -0.171288 | -0.385268 |
| H | 4.213135  | 0.719080  | -0.296301 |
| H | 4.276161  | -0.932650 | 0.011711  |

#### NHNH<sub>2</sub>-1-CN-IND

Total energy (hartree): -550.739226

Sum of electronic and thermal Free Energies (hartree): -550.604154

|   |           |           |           |
|---|-----------|-----------|-----------|
| C | -1.380875 | 2.013061  | -0.061345 |
| C | -2.542781 | 1.398531  | 0.237359  |
| C | -2.295529 | -0.072669 | 0.562591  |
| C | -0.794865 | -0.211310 | 0.337738  |
| C | 0.047355  | -1.309676 | 0.446707  |
| C | 1.419812  | -1.150827 | 0.213601  |
| C | 1.948217  | 0.108502  | -0.129369 |
| C | 1.091861  | 1.224023  | -0.236210 |
| C | -0.271594 | 1.050804  | -0.008790 |
| H | -1.271995 | 3.067852  | -0.309202 |

|   |           |           |           |
|---|-----------|-----------|-----------|
| H | -3.533595 | 1.845160  | 0.267861  |
| H | -0.342036 | -2.295730 | 0.702625  |
| H | 2.094069  | -1.999641 | 0.289128  |
| H | 1.493845  | 2.202903  | -0.504027 |
| H | -2.545467 | -0.262224 | 1.621673  |
| C | -3.114432 | -0.990366 | -0.242158 |
| N | -3.769607 | -1.719935 | -0.863892 |
| N | 3.307954  | 0.279527  | -0.432092 |
| H | 3.621484  | 1.241805  | -0.353679 |
| N | 4.213110  | -0.691291 | 0.048600  |
| H | 4.632567  | -0.411632 | 0.935693  |
| H | 4.947910  | -0.827033 | -0.639133 |

NHNH<sub>2</sub>-2-CN-IND

Total energy (hartree): -550.739820

Sum of electronic and thermal Free Energies (hartree): -550.604703

|   |           |           |           |
|---|-----------|-----------|-----------|
| C | 1.030545  | 2.024960  | -0.034782 |
| C | 2.295809  | 1.600867  | -0.224831 |
| C | 2.313611  | 0.099894  | -0.504321 |
| C | 0.842176  | -0.274366 | -0.379964 |
| C | 0.200578  | -1.502295 | -0.489597 |
| C | -1.189851 | -1.552885 | -0.348663 |
| C | -1.942847 | -0.383740 | -0.107707 |
| C | -1.291271 | 0.857329  | 0.011733  |
| C | 0.097248  | 0.893023  | -0.124312 |
| H | 0.732835  | 3.054344  | 0.158681  |
| H | 3.201239  | 2.202535  | -0.207153 |
| H | 0.760070  | -2.421129 | -0.667423 |
| H | -1.703412 | -2.512506 | -0.430337 |
| H | -1.871936 | 1.755220  | 0.206737  |
| H | 2.670465  | -0.078628 | -1.534268 |
| C | 3.202663  | -0.649148 | 0.394932  |
| N | 3.912611  | -1.246500 | 1.093037  |
| N | -3.341098 | -0.491203 | -0.046973 |
| H | -3.663033 | -1.428349 | 0.173835  |
| N | -4.045948 | 0.553516  | 0.590828  |
| H | -4.225643 | 0.343429  | 1.573168  |
| H | -4.931505 | 0.692562  | 0.113596  |

NMe<sub>2</sub>-CN-IND

Total energy (hartree): -574.027127

Sum of electronic and thermal Free Energies (hartree): -573.855889

|   |          |           |           |
|---|----------|-----------|-----------|
| C | 1.549370 | 2.020214  | -0.018825 |
| C | 2.766759 | 1.492116  | -0.255153 |
| C | 2.649338 | -0.004948 | -0.533378 |
| C | 1.157798 | -0.253890 | -0.354264 |

|   |           |           |           |
|---|-----------|-----------|-----------|
| C | 0.402992  | -1.414816 | -0.451093 |
| C | -0.982491 | -1.352268 | -0.268081 |
| C | -1.641529 | -0.127682 | 0.020549  |
| C | -0.857165 | 1.051933  | 0.106191  |
| C | 0.522264  | 0.969813  | -0.072516 |
| H | 1.347739  | 3.070826  | 0.185033  |
| H | 3.719159  | 2.016394  | -0.269602 |
| H | 0.870189  | -2.377380 | -0.661933 |
| H | -1.552170 | -2.273508 | -0.348916 |
| H | -1.313222 | 2.016120  | 0.313765  |
| H | 2.954154  | -0.210334 | -1.575084 |
| C | 3.506647  | -0.825659 | 0.334013  |
| N | 4.191809  | -1.479943 | 1.005340  |
| N | -3.012160 | -0.088138 | 0.227867  |
| C | -3.815228 | -1.270343 | -0.034885 |
| H | -4.861433 | -1.049111 | 0.196741  |
| H | -3.755990 | -1.598854 | -1.088299 |
| H | -3.503884 | -2.110160 | 0.603268  |
| C | -3.682781 | 1.195655  | 0.340177  |
| H | -3.568202 | 1.814966  | -0.567909 |
| H | -4.750785 | 1.027303  | 0.507641  |
| H | -3.298951 | 1.769555  | 1.196440  |

NO-1-CN-IND

Total energy (hartree): -569.357742

Sum of electronic and thermal Free Energies (hartree): -569.259127

|   |           |           |           |
|---|-----------|-----------|-----------|
| C | -1.252888 | 2.032755  | -0.098048 |
| C | -2.420688 | 1.423920  | 0.186131  |
| C | -2.182286 | -0.040630 | 0.540988  |
| C | -0.678443 | -0.191000 | 0.345155  |
| C | 0.132245  | -1.316930 | 0.486920  |
| C | 1.505797  | -1.178349 | 0.280391  |
| C | 2.035690  | 0.078726  | -0.061069 |
| C | 1.224046  | 1.212402  | -0.211189 |
| C | -0.148980 | 1.067545  | -0.007709 |
| H | -1.132259 | 3.082490  | -0.358570 |
| H | -3.411274 | 1.871478  | 0.192810  |
| H | -0.293280 | -2.287055 | 0.744140  |
| H | 2.183238  | -2.025271 | 0.376273  |
| H | 1.683182  | 2.163109  | -0.481681 |
| H | -2.433298 | -0.209058 | 1.603595  |
| C | -2.984964 | -0.982442 | -0.249900 |
| N | -3.625547 | -1.729353 | -0.865184 |
| N | 3.444161  | 0.311480  | -0.288133 |
| O | 4.162028  | -0.663320 | -0.159171 |

NO-2-CN-IND

Total energy (hartree): -569.358216

Sum of electronic and thermal Free Energies (hartree): -569.259507

|   |           |           |           |
|---|-----------|-----------|-----------|
| C | 0.944780  | 2.039046  | 0.024929  |
| C | 2.194664  | 1.598247  | -0.215594 |
| C | 2.182692  | 0.104530  | -0.526946 |
| C | 0.712219  | -0.259283 | -0.355947 |
| C | 0.081542  | -1.490826 | -0.472027 |
| C | -1.307313 | -1.537503 | -0.290807 |
| C | -2.021299 | -0.365448 | -0.003801 |
| C | -1.386691 | 0.883408  | 0.120709  |
| C | -0.008043 | 0.923243  | -0.054329 |
| H | 0.667700  | 3.067467  | 0.248416  |
| H | 3.109460  | 2.185635  | -0.217204 |
| H | 0.644262  | -2.398740 | -0.687653 |
| H | -1.858940 | -2.474279 | -0.366614 |
| H | -1.978651 | 1.768059  | 0.350120  |
| H | 2.483041  | -0.057968 | -1.577469 |
| C | 3.093712  | -0.684926 | 0.312106  |
| N | 3.820687  | -1.310819 | 0.965227  |
| N | -3.444836 | -0.551729 | 0.154105  |
| O | -4.076926 | 0.460592  | 0.398165  |

NO<sub>2</sub>-CN-IND

Total energy (hartree): -644.582826

Sum of electronic and thermal Free Energies (hartree): -644.479659

|   |           |           |           |
|---|-----------|-----------|-----------|
| C | 1.445486  | 2.038778  | 0.019872  |
| C | 2.658451  | 1.501194  | -0.214356 |
| C | 2.530444  | 0.012514  | -0.522980 |
| C | 1.035639  | -0.233316 | -0.358179 |
| C | 0.303734  | -1.408509 | -0.475400 |
| C | -1.085218 | -1.352400 | -0.303542 |
| C | -1.688761 | -0.123508 | -0.022838 |
| C | -0.970324 | 1.068974  | 0.105425  |
| C | 0.412344  | 0.997868  | -0.062800 |
| H | 1.247131  | 3.085808  | 0.240195  |
| H | 3.616145  | 2.015515  | -0.212707 |
| H | 0.788805  | -2.360931 | -0.686836 |
| H | -1.702524 | -2.243227 | -0.382834 |
| H | -1.489399 | 1.997137  | 0.329738  |
| H | 2.821420  | -0.173628 | -1.572206 |
| C | 3.373227  | -0.844286 | 0.321109  |
| N | 4.045503  | -1.524533 | 0.978344  |
| N | -3.157268 | -0.081509 | 0.150252  |
| O | -3.777981 | -1.134929 | 0.037058  |
| O | -3.670689 | 1.007149  | 0.396269  |

OCF<sub>3</sub>-1-CN-IND

Total energy (hartree): -852.361967

Sum of electronic and thermal Free Energies (hartree): -852.256190

|   |           |           |           |
|---|-----------|-----------|-----------|
| C | 1.842636  | 2.001335  | -0.048201 |
| C | 3.136387  | 1.660553  | -0.210414 |
| C | 3.260479  | 0.164790  | -0.484269 |
| C | 1.815834  | -0.309290 | -0.385811 |
| C | 1.270211  | -1.580942 | -0.507076 |
| C | -0.117100 | -1.728582 | -0.399961 |
| C | -0.924838 | -0.608595 | -0.177434 |
| C | -0.396039 | 0.678271  | -0.048479 |
| C | 0.992607  | 0.807719  | -0.152142 |
| H | 1.471396  | 3.008075  | 0.134660  |
| H | 3.998883  | 2.321422  | -0.176567 |
| H | 1.897403  | -2.456660 | -0.672397 |
| H | -0.586981 | -2.706767 | -0.484468 |
| H | -1.023948 | 1.546447  | 0.127644  |
| H | 3.638949  | 0.008684  | -1.510021 |
| C | 4.181921  | -0.525860 | 0.427872  |
| N | 4.918098  | -1.075321 | 1.137337  |
| O | -2.291283 | -0.915908 | -0.101764 |
| C | -3.223744 | 0.028443  | 0.149797  |
| F | -3.265668 | 0.998448  | -0.797058 |
| F | -3.043798 | 0.648457  | 1.341111  |
| F | -4.415228 | -0.579543 | 0.172682  |

OCF<sub>3</sub>-2-CN-IND

Total energy (hartree): -852.361797

Sum of electronic and thermal Free Energies (hartree): -852.256087

|   |           |           |           |
|---|-----------|-----------|-----------|
| C | -2.518744 | 2.002175  | -0.149137 |
| C | -3.633837 | 1.294908  | 0.119937  |
| C | -3.275237 | -0.133468 | 0.520491  |
| C | -1.758533 | -0.145674 | 0.371979  |
| C | -0.840081 | -1.166703 | 0.559941  |
| C | 0.527800  | -0.903196 | 0.381643  |
| C | 0.932382  | 0.384579  | 0.018697  |
| C | 0.019471  | 1.424876  | -0.179389 |
| C | -1.334731 | 1.145633  | -0.002215 |
| H | -2.488966 | 3.051800  | -0.435662 |
| H | -4.660597 | 1.650641  | 0.086131  |
| H | -1.158231 | -2.172184 | 0.834675  |
| H | 1.248296  | -1.702037 | 0.526637  |
| H | 0.379611  | 2.411305  | -0.466256 |
| H | -3.553226 | -0.300344 | 1.576215  |
| C | -3.964648 | -1.157426 | -0.276097 |

|   |           |           |           |
|---|-----------|-----------|-----------|
| N | -4.515808 | -1.971014 | -0.893741 |
| O | 2.265972  | 0.771510  | -0.179144 |
| C | 3.287333  | -0.110012 | -0.100078 |
| F | 3.180921  | -1.126349 | -0.988456 |
| F | 3.411282  | -0.669475 | 1.128568  |
| F | 4.415458  | 0.559344  | -0.365338 |

OCF<sub>3</sub>-3-CN-IND

Total energy (hartree): -852.362205

Sum of electronic and thermal Free Energies (hartree): -852.256986

|   |           |           |           |
|---|-----------|-----------|-----------|
| C | 2.157875  | 2.029315  | 0.131379  |
| C | 3.378980  | 1.461710  | 0.080105  |
| C | 3.270097  | 0.006453  | -0.365119 |
| C | 1.763732  | -0.187717 | -0.497710 |
| C | 1.030767  | -1.313573 | -0.848827 |
| C | -0.365479 | -1.207814 | -0.928104 |
| C | -0.978102 | 0.015362  | -0.653290 |
| C | -0.259053 | 1.159163  | -0.305253 |
| C | 1.130456  | 1.041139  | -0.221749 |
| H | 1.951383  | 3.064475  | 0.396631  |
| H | 4.332783  | 1.934966  | 0.299358  |
| H | 1.517276  | -2.266922 | -1.053907 |
| H | -0.978933 | -2.063518 | -1.202996 |
| H | -0.776045 | 2.096532  | -0.110282 |
| H | 3.751657  | -0.114028 | -1.351730 |
| C | 3.918207  | -0.940791 | 0.551603  |
| N | 4.440022  | -1.692646 | 1.265375  |
| O | -2.375707 | 0.117262  | -0.823450 |
| C | -3.158367 | -0.071891 | 0.264915  |
| F | -2.919141 | 0.829800  | 1.248416  |
| F | -3.003610 | -1.298239 | 0.817491  |
| F | -4.433614 | 0.058526  | -0.120885 |

OH-1-CN-IND

Total energy (hartree): -515.282992

Sum of electronic and thermal Free Energies (hartree): -515.175261

|   |           |           |           |
|---|-----------|-----------|-----------|
| C | -0.765229 | 2.031000  | -0.077591 |
| C | -1.977982 | 1.521899  | 0.216731  |
| C | -1.862696 | 0.038410  | 0.557264  |
| C | -0.378411 | -0.233095 | 0.345430  |
| C | 0.354024  | -1.405657 | 0.464059  |
| C | 1.737002  | -1.365555 | 0.234958  |
| C | 2.365555  | -0.158242 | -0.106693 |
| C | 1.630762  | 1.029136  | -0.232133 |
| C | 0.255437  | 0.976543  | -0.007220 |
| H | -0.561322 | 3.069546  | -0.332729 |

|   |           |           |           |
|---|-----------|-----------|-----------|
| H | -2.926147 | 2.053549  | 0.237040  |
| H | -0.125054 | -2.350857 | 0.720308  |
| H | 2.328400  | -2.279155 | 0.319483  |
| H | 2.141693  | 1.952020  | -0.502812 |
| H | -2.132892 | -0.117497 | 1.616767  |
| C | -2.750468 | -0.815839 | -0.243768 |
| N | -3.458194 | -1.496458 | -0.863148 |
| O | 3.714711  | -0.077001 | -0.336282 |
| H | 4.117018  | -0.947996 | -0.231979 |

#### OH-2-CN-IND

Total energy (hartree): -515.282679

Sum of electronic and thermal Free Energies (hartree): -515.174964

|   |           |           |           |
|---|-----------|-----------|-----------|
| C | -0.749656 | 2.030842  | -0.071642 |
| C | -1.966613 | 1.530959  | 0.221833  |
| C | -1.861922 | 0.045655  | 0.556766  |
| C | -0.379818 | -0.236762 | 0.344543  |
| C | 0.345637  | -1.416723 | 0.462380  |
| C | 1.726439  | -1.390757 | 0.236237  |
| C | 2.365114  | -0.188112 | -0.102794 |
| C | 1.640149  | 1.005705  | -0.227365 |
| C | 0.261357  | 0.967182  | -0.004073 |
| H | -0.538109 | 3.068731  | -0.323762 |
| H | -2.910469 | 2.070074  | 0.243784  |
| H | -0.142682 | -2.357651 | 0.716967  |
| H | 2.325600  | -2.296616 | 0.315427  |
| H | 2.143158  | 1.936776  | -0.495209 |
| H | -2.133211 | -0.112293 | 1.615706  |
| C | -2.756885 | -0.797356 | -0.248105 |
| N | -3.471443 | -1.467234 | -0.871297 |
| O | 3.719860  | -0.246274 | -0.305066 |
| H | 4.054117  | 0.628019  | -0.539988 |

#### OMe-1-CN-IND

Total energy (hartree): -554.583688

Sum of electronic and thermal Free Energies (hartree): -554.449898

|   |           |           |           |
|---|-----------|-----------|-----------|
| C | 0.997543  | 2.023942  | -0.006047 |
| C | 2.262720  | 1.616763  | -0.230772 |
| C | 2.289968  | 0.118952  | -0.522621 |
| C | 0.826624  | -0.274437 | -0.364669 |
| C | 0.199495  | -1.512454 | -0.474725 |
| C | -1.184572 | -1.584272 | -0.306173 |
| C | -1.937533 | -0.426467 | -0.030907 |
| C | -1.311045 | 0.824629  | 0.084434  |
| C | 0.077862  | 0.880442  | -0.082344 |
| H | 0.692654  | 3.048041  | 0.203620  |



|   |           |           |           |
|---|-----------|-----------|-----------|
| H | 3.161117  | 2.228956  | -0.229740 |
| H | 0.768608  | -2.419715 | -0.678695 |
| H | -1.709301 | -2.535660 | -0.380527 |
| H | -1.874215 | 1.728974  | 0.300573  |
| H | 2.619610  | -0.047044 | -1.563644 |
| C | 3.210796  | -0.627325 | 0.345920  |
| N | 3.946867  | -1.220453 | 1.019866  |
| O | -3.281644 | -0.626217 | 0.110623  |
| C | -4.104199 | 0.498345  | 0.402897  |
| H | -3.819919 | 0.962532  | 1.359862  |
| H | -4.055211 | 1.248887  | -0.401184 |
| H | -5.124214 | 0.109234  | 0.475728  |

#### OMe-2-CN-IND

Total energy (hartree): -554.583814

Sum of electronic and thermal Free Energies (hartree): -554.450025

|   |           |           |           |
|---|-----------|-----------|-----------|
| C | -1.392665 | 2.013270  | -0.101886 |
| C | -2.551151 | 1.386014  | 0.182176  |
| C | -2.290846 | -0.074101 | 0.544854  |
| C | -0.783041 | -0.194869 | 0.358092  |
| C | 0.065070  | -1.280104 | 0.503103  |
| C | 1.444485  | -1.107520 | 0.294183  |
| C | 1.953077  | 0.154367  | -0.056286 |
| C | 1.092963  | 1.257483  | -0.208136 |
| C | -0.270241 | 1.070266  | -0.002896 |
| H | -1.292857 | 3.064120  | -0.368394 |
| H | -3.548938 | 1.817928  | 0.181536  |
| H | -0.318047 | -2.266294 | 0.766561  |
| H | 2.104577  | -1.963674 | 0.405232  |
| H | 1.511859  | 2.224010  | -0.484889 |
| H | -2.561206 | -0.244551 | 1.602017  |
| C | -3.074269 | -1.023481 | -0.258073 |
| N | -3.699747 | -1.778985 | -0.879231 |
| O | 3.276564  | 0.413476  | -0.275884 |
| C | 4.207144  | -0.657057 | -0.150243 |
| H | 4.207022  | -1.068457 | 0.870841  |
| H | 3.992171  | -1.459606 | -0.872301 |
| H | 5.187983  | -0.223994 | -0.368241 |

#### SH-CN-IND

Total energy (hartree): -838.255821

Sum of electronic and thermal Free Energies (hartree): -838.154997

|   |           |           |           |
|---|-----------|-----------|-----------|
| C | -1.189280 | 2.031714  | -0.069675 |
| C | -2.405514 | 1.512644  | 0.190485  |
| C | -2.287243 | 0.030064  | 0.533023  |
| C | -0.795541 | -0.229533 | 0.362378  |

|   |           |           |           |
|---|-----------|-----------|-----------|
| C | -0.057144 | -1.397103 | 0.502128  |
| C | 1.330225  | -1.345877 | 0.313212  |
| C | 1.967114  | -0.134822 | -0.010153 |
| C | 1.219451  | 1.045027  | -0.155482 |
| C | -0.163340 | 0.984369  | 0.028918  |
| H | -0.986705 | 3.072131  | -0.318277 |
| H | -3.358226 | 2.036363  | 0.184710  |
| H | -0.535821 | -2.346213 | 0.744233  |
| H | 1.920077  | -2.256707 | 0.415748  |
| H | 1.705020  | 1.986970  | -0.409347 |
| H | -2.581662 | -0.129361 | 1.585561  |
| C | -3.145739 | -0.831690 | -0.291125 |
| N | -3.831555 | -1.516326 | -0.930192 |
| S | 3.744582  | -0.179186 | -0.223617 |
| H | 3.906963  | 1.129315  | -0.535667 |

#### SiH<sub>3</sub>-CN-IND

Total energy (hartree): -730.753260

Sum of electronic and thermal Free Energies (hartree): -730.638444

|    |           |           |           |
|----|-----------|-----------|-----------|
| C  | 1.231396  | 2.032764  | 0.078779  |
| C  | 2.447892  | 1.512211  | -0.176872 |
| C  | 2.327248  | 0.031331  | -0.526422 |
| C  | 0.833335  | -0.226997 | -0.362513 |
| C  | 0.101073  | -1.395480 | -0.510851 |
| C  | -1.290291 | -1.337581 | -0.327494 |
| C  | -1.947908 | -0.134636 | -0.002469 |
| C  | -1.181525 | 1.039915  | 0.147356  |
| C  | 0.202522  | 0.989155  | -0.028585 |
| H  | 1.029988  | 3.072742  | 0.330133  |
| H  | 3.402042  | 2.033061  | -0.164595 |
| H  | 0.585480  | -2.341685 | -0.753840 |
| H  | -1.869326 | -2.255050 | -0.440348 |
| H  | -1.660492 | 1.987324  | 0.402438  |
| H  | 2.619946  | -0.125346 | -1.579792 |
| C  | 3.180034  | -0.839183 | 0.293671  |
| N  | 3.862018  | -1.529539 | 0.930632  |
| Si | -3.825843 | -0.101166 | 0.234951  |
| H  | -4.174091 | 0.335856  | 1.621580  |
| H  | -4.370538 | -1.470555 | -0.004459 |
| H  | -4.457989 | 0.857765  | -0.722446 |

#### SiMe<sub>3</sub>-CN-IND

Total energy (hartree): -848.745922

Sum of electronic and thermal Free Energies (hartree): -848.551657

|   |          |          |           |
|---|----------|----------|-----------|
| C | 2.194160 | 2.023382 | 0.068507  |
| C | 3.415761 | 1.500548 | -0.156935 |

|    |           |           |           |
|----|-----------|-----------|-----------|
| C  | 3.299563  | 0.020680  | -0.513388 |
| C  | 1.800777  | -0.232933 | -0.389992 |
| C  | 1.065986  | -1.396746 | -0.561475 |
| C  | -0.329755 | -1.331475 | -0.414424 |
| C  | -0.997619 | -0.130180 | -0.102740 |
| C  | -0.223360 | 1.036738  | 0.070480  |
| C  | 1.164929  | 0.983429  | -0.068731 |
| H  | 1.989835  | 3.063411  | 0.317568  |
| H  | 4.370779  | 2.018485  | -0.118213 |
| H  | 1.551979  | -2.344622 | -0.795054 |
| H  | -0.903971 | -2.248738 | -0.546691 |
| H  | -0.700972 | 1.987317  | 0.317175  |
| H  | 3.620995  | -0.135023 | -1.558444 |
| C  | 4.127563  | -0.853291 | 0.328277  |
| N  | 4.790648  | -1.546214 | 0.982338  |
| Si | -2.891612 | -0.055147 | 0.097213  |
| C  | -3.642777 | -1.761298 | -0.230487 |
| H  | -3.269605 | -2.517715 | 0.474776  |
| H  | -4.735800 | -1.718545 | -0.117335 |
| H  | -3.431939 | -2.115459 | -1.249774 |
| C  | -3.592468 | 1.202201  | -1.137108 |
| H  | -4.683320 | 1.294564  | -1.028787 |
| H  | -3.159910 | 2.201867  | -0.985289 |
| H  | -3.382241 | 0.904460  | -2.174313 |
| C  | -3.305319 | 0.498785  | 1.862300  |
| H  | -2.880768 | 1.488368  | 2.085973  |
| H  | -4.393464 | 0.565386  | 2.009858  |
| H  | -2.908208 | -0.207236 | 2.605497  |

tBu-1-CN-IND

Total energy (hartree): -597.314011

Sum of electronic and thermal Free Energies (hartree): -597.104273

|   |           |           |           |
|---|-----------|-----------|-----------|
| C | 1.829392  | 2.020287  | 0.070662  |
| C | 3.051961  | 1.505716  | -0.168589 |
| C | 2.942347  | 0.025210  | -0.526134 |
| C | 1.446780  | -0.236682 | -0.388339 |
| C | 0.708685  | -1.397129 | -0.551958 |
| C | -0.686099 | -1.338220 | -0.388942 |
| C | -1.352806 | -0.143111 | -0.067998 |
| C | -0.578784 | 1.023279  | 0.097449  |
| C | 0.805667  | 0.973712  | -0.057818 |
| H | 1.621399  | 3.058657  | 0.323811  |
| H | 4.003724  | 2.030148  | -0.138559 |
| H | 1.188667  | -2.346097 | -0.792565 |
| H | -1.249665 | -2.258764 | -0.517140 |
| H | -1.054010 | 1.970003  | 0.351756  |

|   |           |           |           |
|---|-----------|-----------|-----------|
| H | 3.257476  | -0.127115 | -1.573538 |
| C | 3.783584  | -0.843030 | 0.308627  |
| N | 4.456915  | -1.531706 | 0.956750  |
| C | -2.880205 | -0.069214 | 0.113361  |
| C | -3.201410 | 0.402175  | 1.550811  |
| H | -2.786152 | 1.397023  | 1.755563  |
| H | -4.289275 | 0.455741  | 1.699151  |
| H | -2.788556 | -0.294922 | 2.292445  |
| C | -3.563318 | -1.430415 | -0.110038 |
| H | -4.647540 | -1.322805 | 0.027221  |
| H | -3.394226 | -1.810875 | -1.126422 |
| H | -3.213332 | -2.186809 | 0.605283  |
| C | -3.468525 | 0.938081  | -0.901926 |
| H | -3.251944 | 0.626767  | -1.932855 |
| H | -4.559695 | 1.000596  | -0.785477 |
| H | -3.058890 | 1.946431  | -0.760940 |

tBu-2-CN-IND

Total energy (hartree): -597.314011

Sum of electronic and thermal Free Energies (hartree): -597.104270

|   |           |           |           |
|---|-----------|-----------|-----------|
| C | 1.829392  | 2.020286  | 0.070659  |
| C | 3.051961  | 1.505716  | -0.168590 |
| C | 2.942347  | 0.025208  | -0.526132 |
| C | 1.446780  | -0.236683 | -0.388337 |
| C | 0.708684  | -1.397130 | -0.551958 |
| C | -0.686101 | -1.338220 | -0.388944 |
| C | -1.352808 | -0.143110 | -0.068000 |
| C | -0.578784 | 1.023278  | 0.097451  |
| C | 0.805667  | 0.973711  | -0.057816 |
| H | 1.621399  | 3.058657  | 0.323804  |
| H | 4.003725  | 2.030147  | -0.138563 |
| H | 1.188665  | -2.346099 | -0.792563 |
| H | -1.249667 | -2.258763 | -0.517142 |
| H | -1.054010 | 1.970002  | 0.351756  |
| H | 3.257477  | -0.127115 | -1.573536 |
| C | 3.783589  | -0.843033 | 0.308623  |
| N | 4.456924  | -1.531697 | 0.956752  |
| C | -2.880208 | -0.069213 | 0.113361  |
| C | -3.468528 | 0.938082  | -0.901926 |
| H | -3.251949 | 0.626770  | -1.932857 |
| H | -4.559698 | 1.000597  | -0.785478 |
| H | -3.058896 | 1.946432  | -0.760940 |
| C | -3.201411 | 0.402175  | 1.550813  |
| H | -4.289277 | 0.455740  | 1.699153  |
| H | -2.788556 | -0.294921 | 2.292446  |
| H | -2.786155 | 1.397023  | 1.755565  |

|   |           |           |           |
|---|-----------|-----------|-----------|
| C | -3.563319 | -1.430416 | -0.110037 |
| H | -3.213333 | -2.186808 | 0.605285  |
| H | -4.647540 | -1.322805 | 0.027220  |
| H | -3.394227 | -1.810878 | -1.126421 |

tBu-3-CN-IND

Total energy (hartree): -597.314011

Sum of electronic and thermal Free Energies (hartree): -597.104281

|   |           |           |           |
|---|-----------|-----------|-----------|
| C | 1.829392  | 2.020289  | 0.070654  |
| C | 3.051961  | 1.505715  | -0.168588 |
| C | 2.942344  | 0.025209  | -0.526129 |
| C | 1.446778  | -0.236679 | -0.388333 |
| C | 0.708685  | -1.397126 | -0.551962 |
| C | -0.686101 | -1.338219 | -0.388945 |
| C | -1.352806 | -0.143111 | -0.067997 |
| C | -0.578785 | 1.023281  | 0.097449  |
| C | 0.805666  | 0.973714  | -0.057815 |
| H | 1.621401  | 3.058662  | 0.323794  |
| H | 4.003725  | 2.030147  | -0.138562 |
| H | 1.188666  | -2.346093 | -0.792577 |
| H | -1.249667 | -2.258761 | -0.517151 |
| H | -1.054016 | 1.970003  | 0.351752  |
| H | 3.257479  | -0.127122 | -1.573532 |
| C | 3.783577  | -0.843034 | 0.308634  |
| N | 4.456927  | -1.531704 | 0.956743  |
| C | -2.880206 | -0.069214 | 0.113360  |
| C | -3.563314 | -1.430420 | -0.110031 |
| H | -3.213324 | -2.186807 | 0.605295  |
| H | -4.647535 | -1.322811 | 0.027227  |
| H | -3.394221 | -1.810887 | -1.126413 |
| C | -3.468529 | 0.938076  | -0.901929 |
| H | -4.559699 | 1.000591  | -0.785473 |
| H | -3.058894 | 1.946426  | -0.760949 |
| H | -3.251956 | 0.626756  | -1.932858 |
| C | -3.201408 | 0.402179  | 1.550813  |
| H | -2.786137 | 1.397022  | 1.755562  |
| H | -4.289273 | 0.455760  | 1.699147  |
| H | -2.788565 | -0.294924 | 2.292445  |

Vin-1-CN-IND

Total energy (hartree): -517.453920

Sum of electronic and thermal Free Energies (hartree): -517.319332

|   |          |           |           |
|---|----------|-----------|-----------|
| C | 0.981515 | 2.030092  | 0.008543  |
| C | 2.238542 | 1.601502  | -0.219279 |
| C | 2.242211 | 0.104723  | -0.519550 |
| C | 0.772632 | -0.267426 | -0.359531 |

|   |           |           |           |
|---|-----------|-----------|-----------|
| C | 0.133264  | -1.493108 | -0.471177 |
| C | -1.257271 | -1.536125 | -0.298368 |
| C | -2.011800 | -0.379011 | -0.019518 |
| C | -1.341712 | 0.857563  | 0.094743  |
| C | 0.040063  | 0.904363  | -0.071157 |
| H | 0.695181  | 3.058343  | 0.223204  |
| H | 3.147325  | 2.198176  | -0.216944 |
| H | 0.689518  | -2.407558 | -0.678037 |
| H | -1.773493 | -2.493233 | -0.379884 |
| H | -1.895783 | 1.769196  | 0.314924  |
| H | 2.561366  | -0.062481 | -1.563635 |
| C | 3.152788  | -0.664937 | 0.338884  |
| N | 3.880691  | -1.275834 | 1.005575  |
| C | -3.471187 | -0.512578 | 0.145054  |
| H | -3.850484 | -1.532646 | 0.039305  |
| C | -4.355020 | 0.463797  | 0.403620  |
| H | -4.066391 | 1.508163  | 0.524106  |
| H | -5.416233 | 0.239744  | 0.504352  |

Vin-2-CN-IND

Total energy (hartree): -517.453776

Sum of electronic and thermal Free Energies (hartree): -517.319198

|   |           |           |           |
|---|-----------|-----------|-----------|
| C | -1.306305 | 2.018455  | -0.090138 |
| C | -2.477351 | 1.410501  | 0.184790  |
| C | -2.241541 | -0.056115 | 0.536334  |
| C | -0.735729 | -0.201857 | 0.352351  |
| C | 0.090940  | -1.311322 | 0.494285  |
| C | 1.465878  | -1.154463 | 0.292881  |
| C | 2.026451  | 0.095391  | -0.047283 |
| C | 1.171470  | 1.205994  | -0.190521 |
| C | -0.202196 | 1.053391  | 0.005282  |
| H | -1.186072 | 3.069462  | -0.347373 |
| H | -3.467592 | 1.859066  | 0.185117  |
| H | -0.316528 | -2.290123 | 0.748136  |
| H | 2.112702  | -2.023656 | 0.401065  |
| H | 1.588759  | 2.178062  | -0.456917 |
| H | -2.509932 | -0.230071 | 1.593576  |
| C | -3.038144 | -0.989768 | -0.271109 |
| N | -3.674702 | -1.731393 | -0.897460 |
| C | 3.473193  | 0.285909  | -0.262948 |
| H | 3.763698  | 1.307658  | -0.522943 |
| C | 4.441735  | -0.638995 | -0.176265 |
| H | 4.245846  | -1.681167 | 0.076238  |
| H | 5.481632  | -0.372206 | -0.360629 |

## Coordinates and energies of NC-IND

BF<sub>2</sub>-NC-IND

Total energy (hartree): -664.110249

Sum of electronic and thermal Free Energies (hartree): -664.010806

|   |           |           |           |
|---|-----------|-----------|-----------|
| C | 1.535726  | 2.019322  | 0.010421  |
| C | 2.748330  | 1.467011  | -0.183404 |
| C | 2.609177  | -0.019937 | -0.484740 |
| C | 1.111445  | -0.255513 | -0.328991 |
| C | 0.377430  | -1.429048 | -0.427995 |
| C | -1.014333 | -1.351609 | -0.274878 |
| C | -1.661315 | -0.122148 | -0.033971 |
| C | -0.893049 | 1.058655  | 0.066977  |
| C | 0.491083  | 0.984893  | -0.074077 |
| H | 1.341699  | 3.072261  | 0.207275  |
| H | 3.713152  | 1.967850  | -0.168262 |
| H | 0.863884  | -2.387740 | -0.608092 |
| H | -1.610305 | -2.261548 | -0.343655 |
| H | -1.383912 | 2.013057  | 0.257948  |
| H | 2.905454  | -0.212912 | -1.529848 |
| N | 3.422204  | -0.857938 | 0.341079  |
| C | 4.102198  | -1.550179 | 1.005967  |
| B | -3.196517 | -0.065753 | 0.123943  |
| F | -3.841274 | 1.088466  | 0.354340  |
| F | -3.963500 | -1.162391 | 0.037385  |

Br-NC-IND

Total energy (hartree): -3013.566235

Sum of electronic and thermal Free Energies (hartree): -3013.475412

|   |           |           |           |
|---|-----------|-----------|-----------|
| C | -1.882104 | 2.019015  | -0.066575 |
| C | -3.095381 | 1.472541  | 0.139962  |
| C | -2.958506 | -0.005237 | 0.485649  |
| C | -1.460892 | -0.244140 | 0.344267  |
| C | -0.718888 | -1.407437 | 0.482639  |
| C | 0.676303  | -1.340603 | 0.333746  |
| C | 1.282440  | -0.111473 | 0.059571  |
| C | 0.547179  | 1.070392  | -0.086017 |
| C | -0.839664 | 0.986012  | 0.053448  |
| H | -1.687039 | 3.065326  | -0.295180 |
| H | -4.059812 | 1.973393  | 0.105010  |
| H | -1.196302 | -2.364991 | 0.691305  |
| H | 1.283317  | -2.238479 | 0.430420  |
| H | 1.044263  | 2.013698  | -0.303918 |
| H | -3.265538 | -0.166524 | 1.532831  |
| N | -3.770173 | -0.862994 | -0.322413 |
| C | -4.448450 | -1.573061 | -0.969857 |

|    |          |           |           |
|----|----------|-----------|-----------|
| Br | 3.190289 | -0.041072 | -0.130417 |
|----|----------|-----------|-----------|

#### CHO-1-NC-IND

Total energy (hartree): -553.352239

Sum of electronic and thermal Free Energies (hartree): -553.241701

|   |           |           |           |
|---|-----------|-----------|-----------|
| C | 1.001361  | 2.024743  | 0.020379  |
| C | 2.250373  | 1.565191  | -0.183009 |
| C | 2.222547  | 0.073562  | -0.492059 |
| C | 0.748064  | -0.275394 | -0.327818 |
| C | 0.106961  | -1.501015 | -0.425331 |
| C | -1.286070 | -1.529167 | -0.259226 |
| C | -2.006997 | -0.350840 | -0.010259 |
| C | -1.346470 | 0.889624  | 0.090537  |
| C | 0.035618  | 0.916087  | -0.062096 |
| H | 0.730321  | 3.059117  | 0.223866  |
| H | 3.174972  | 2.137140  | -0.171181 |
| H | 0.663248  | -2.419190 | -0.613001 |
| H | -1.821339 | -2.477752 | -0.323653 |
| H | -1.928688 | 1.788657  | 0.289637  |
| H | 2.526086  | -0.090782 | -1.539945 |
| N | 3.101632  | -0.705441 | 0.323894  |
| C | 3.835638  | -1.349831 | 0.979414  |
| C | -3.480389 | -0.429269 | 0.151545  |
| H | -3.907675 | -1.455993 | 0.063310  |
| O | -4.204021 | 0.524344  | 0.363907  |

#### CHO-2-NC-IND

Total energy (hartree): -553.351638

Sum of electronic and thermal Free Energies (hartree): -553.241180

|   |           |           |           |
|---|-----------|-----------|-----------|
| C | -1.299495 | 2.010913  | -0.083831 |
| C | -2.466938 | 1.385756  | 0.159542  |
| C | -2.220018 | -0.076987 | 0.506514  |
| C | -0.713855 | -0.217250 | 0.320527  |
| C | 0.100378  | -1.338076 | 0.442277  |
| C | 1.477759  | -1.181353 | 0.253892  |
| C | 2.019535  | 0.081863  | -0.044862 |
| C | 1.187870  | 1.208829  | -0.170333 |
| C | -0.186265 | 1.051359  | 0.008129  |
| H | -1.182547 | 3.066944  | -0.320819 |
| H | -3.463589 | 1.820046  | 0.152449  |
| H | -0.319744 | -2.318230 | 0.668021  |
| H | 2.154645  | -2.030891 | 0.334698  |
| H | 1.619908  | 2.182646  | -0.407380 |
| H | -2.477789 | -0.251565 | 1.565036  |
| N | -2.994086 | -0.995235 | -0.269471 |
| C | -3.642150 | -1.753194 | -0.893444 |



|   |          |           |           |
|---|----------|-----------|-----------|
| C | 3.483375 | 0.241196  | -0.236965 |
| H | 3.812689 | 1.280348  | -0.476148 |
| O | 4.296733 | -0.657625 | -0.149780 |

#### Cl-NC-IND

Total energy (hartree): -899.630409

Sum of electronic and thermal Free Energies (hartree): -899.537904

|    |           |           |           |
|----|-----------|-----------|-----------|
| C  | -1.204071 | 2.019494  | -0.068207 |
| C  | -2.416295 | 1.480018  | 0.161749  |
| C  | -2.281509 | 0.000867  | 0.502301  |
| C  | -0.788544 | -0.246651 | 0.331050  |
| C  | -0.050860 | -1.414630 | 0.453342  |
| C  | 1.340848  | -1.356089 | 0.276759  |
| C  | 1.948630  | -0.130389 | -0.008218 |
| C  | 1.218286  | 1.056215  | -0.137592 |
| C  | -0.165605 | 0.980170  | 0.029433  |
| H  | -1.007496 | 3.065021  | -0.299131 |
| H  | -3.378153 | 1.986777  | 0.146855  |
| H  | -0.530041 | -2.369365 | 0.670361  |
| H  | 1.948677  | -2.254870 | 0.359189  |
| H  | 1.721258  | 1.994337  | -0.364549 |
| H  | -2.569521 | -0.160504 | 1.554849  |
| N  | -3.114039 | -0.850420 | -0.291455 |
| C  | -3.808910 | -1.555410 | -0.926715 |
| Cl | 3.697749  | -0.077060 | -0.218282 |

#### COCH<sub>3</sub>-1-NC-IND

Total energy (hartree): -592.677139

Sum of electronic and thermal Free Energies (hartree): -592.541058

|   |           |           |           |
|---|-----------|-----------|-----------|
| C | 1.465985  | 2.025519  | -0.012908 |
| C | 2.693082  | 1.503635  | -0.199665 |
| C | 2.593181  | 0.009686  | -0.483998 |
| C | 1.101670  | -0.261988 | -0.327599 |
| C | 0.392656  | -1.453127 | -0.415721 |
| C | -0.998384 | -1.410007 | -0.266099 |
| C | -1.669551 | -0.194834 | -0.038236 |
| C | -0.937877 | 1.005244  | 0.052550  |
| C | 0.449223  | 0.962549  | -0.087279 |
| H | 1.245306  | 3.075415  | 0.172513  |
| H | 3.644282  | 2.030100  | -0.188845 |
| H | 0.900302  | -2.402560 | -0.586511 |
| H | -1.592774 | -2.320067 | -0.323946 |
| H | -1.439529 | 1.954375  | 0.233281  |
| H | 2.896932  | -0.187241 | -1.526265 |
| N | 3.426770  | -0.795002 | 0.354213  |
| C | 4.124604  | -1.458838 | 1.029627  |

|   |           |           |           |
|---|-----------|-----------|-----------|
| C | -3.166920 | -0.225470 | 0.105722  |
| O | -3.777463 | -1.279109 | 0.012887  |
| C | -3.906522 | 1.073581  | 0.367095  |
| H | -3.733436 | 1.792933  | -0.446531 |
| H | -4.976565 | 0.858997  | 0.442510  |
| H | -3.559098 | 1.540238  | 1.300266  |

COCH<sub>3</sub>-2-NC-IND

Total energy (hartree): -592.677669

Sum of electronic and thermal Free Energies (hartree): -592.541539

|   |           |           |           |
|---|-----------|-----------|-----------|
| C | 1.572831  | 2.008277  | 0.025449  |
| C | 2.770054  | 1.426213  | -0.176638 |
| C | 2.593122  | -0.054603 | -0.490310 |
| C | 1.090409  | -0.252046 | -0.331682 |
| C | 0.322873  | -1.401458 | -0.435482 |
| C | -1.067245 | -1.288706 | -0.274836 |
| C | -1.671889 | -0.044902 | -0.023955 |
| C | -0.877838 | 1.114695  | 0.081536  |
| C | 0.500843  | 1.002013  | -0.064778 |
| H | 1.406431  | 3.063888  | 0.232334  |
| H | 3.747487  | 1.902144  | -0.159860 |
| H | 0.779096  | -2.372956 | -0.625168 |
| H | -1.676532 | -2.187423 | -0.348240 |
| H | -1.364652 | 2.067963  | 0.281111  |
| H | 2.883768  | -0.246636 | -1.537135 |
| N | 3.386301  | -0.919089 | 0.328160  |
| C | 4.048275  | -1.635263 | 0.985913  |
| C | -3.160011 | 0.096909  | 0.143453  |
| O | -3.655440 | 1.195228  | 0.345569  |
| C | -4.034866 | -1.139639 | 0.058613  |
| H | -3.749486 | -1.874081 | 0.825578  |
| H | -5.077116 | -0.842281 | 0.207069  |
| H | -3.928939 | -1.627754 | -0.921054 |

CONH<sub>2</sub>-1-NC-IND

Total energy (hartree): -608.745066

Sum of electronic and thermal Free Energies (hartree): -608.618933

|   |           |           |           |
|---|-----------|-----------|-----------|
| C | 1.495439  | 2.012115  | -0.138715 |
| C | 2.712491  | 1.456516  | -0.291351 |
| C | 2.584567  | -0.050122 | -0.480732 |
| C | 1.087763  | -0.283096 | -0.313711 |
| C | 0.353342  | -1.460195 | -0.349009 |
| C | -1.039143 | -1.380551 | -0.214073 |
| C | -1.680353 | -0.143674 | -0.039606 |
| C | -0.926839 | 1.044517  | -0.009424 |
| C | 0.459326  | 0.965834  | -0.144597 |

|   |           |           |           |
|---|-----------|-----------|-----------|
| H | 1.294881  | 3.075771  | -0.021012 |
| H | 3.673334  | 1.964840  | -0.311907 |
| H | 0.839703  | -2.427909 | -0.472248 |
| H | -1.653452 | -2.278466 | -0.247638 |
| H | -1.412702 | 2.015684  | 0.083295  |
| H | 2.890304  | -0.319725 | -1.505730 |
| N | 3.400010  | -0.814117 | 0.412706  |
| C | 4.082298  | -1.444708 | 1.134008  |
| C | -3.180801 | -0.158155 | 0.085694  |
| O | -3.857193 | -1.086647 | -0.340518 |
| N | -3.756149 | 0.939416  | 0.679453  |
| H | -4.751089 | 0.883396  | 0.848657  |
| H | -3.218998 | 1.551591  | 1.274713  |

#### CONH<sub>2</sub>-2-NC-IND

Total energy (hartree): -608.745462

Sum of electronic and thermal Free Energies (hartree): -608.619555

|   |           |           |           |
|---|-----------|-----------|-----------|
| C | 1.525426  | 2.011621  | -0.090439 |
| C | 2.732671  | 1.441483  | -0.265845 |
| C | 2.581256  | -0.057447 | -0.495426 |
| C | 1.083652  | -0.272921 | -0.316637 |
| C | 0.336052  | -1.440043 | -0.342119 |
| C | -1.055215 | -1.342811 | -0.182244 |
| C | -1.679687 | -0.096774 | -0.005823 |
| C | -0.907738 | 1.078048  | 0.036734  |
| C | 0.472985  | 0.981828  | -0.117044 |
| H | 1.340052  | 3.073905  | 0.058033  |
| H | 3.701159  | 1.935347  | -0.281095 |
| H | 0.809280  | -2.414538 | -0.462383 |
| H | -1.640375 | -2.261555 | -0.162396 |
| H | -1.409417 | 2.030208  | 0.200476  |
| H | 2.869790  | -0.300594 | -1.532140 |
| N | 3.396319  | -0.861773 | 0.362108  |
| C | 4.077020  | -1.530364 | 1.049784  |
| C | -3.166979 | 0.057788  | 0.178517  |
| O | -3.653257 | 1.077702  | 0.654459  |
| N | -3.951172 | -1.004481 | -0.192895 |
| H | -4.950770 | -0.866736 | -0.143198 |
| H | -3.606351 | -1.736325 | -0.794208 |

#### COOCH<sub>3</sub>-1-NC-IND

Total energy (hartree): -667.921492

Sum of electronic and thermal Free Energies (hartree): -667.781509

|   |          |          |           |
|---|----------|----------|-----------|
| C | 1.763916 | 2.046373 | -0.040861 |
| C | 3.018529 | 1.581585 | -0.192404 |
| C | 2.996608 | 0.080983 | -0.456165 |

|   |           |           |           |
|---|-----------|-----------|-----------|
| C | 1.517014  | -0.260893 | -0.327521 |
| C | 0.869874  | -1.485824 | -0.411026 |
| C | -0.525771 | -1.508572 | -0.290049 |
| C | -1.251518 | -0.321894 | -0.096115 |
| C | -0.588362 | 0.916323  | -0.009290 |
| C | 0.800848  | 0.935007  | -0.119754 |
| H | 1.488417  | 3.086697  | 0.123127  |
| H | 3.942983  | 2.153323  | -0.169421 |
| H | 1.425615  | -2.412156 | -0.555608 |
| H | -1.072843 | -2.447875 | -0.344475 |
| H | -1.155684 | 1.831355  | 0.145232  |
| H | 3.332750  | -0.116067 | -1.488235 |
| N | 3.849939  | -0.671546 | 0.410940  |
| C | 4.564388  | -1.292103 | 1.109443  |
| C | -2.737525 | -0.429621 | 0.017218  |
| O | -3.358315 | -1.471478 | -0.055801 |
| O | -3.331967 | 0.770706  | 0.211868  |
| C | -4.767570 | 0.736784  | 0.330271  |
| H | -5.215870 | 0.330439  | -0.584317 |
| H | -5.064838 | 0.116086  | 1.183980  |
| H | -5.070435 | 1.776310  | 0.482115  |

COOCH<sub>3</sub>-2-NC-IND

Total energy (hartree): -667.921660

Sum of electronic and thermal Free Energies (hartree): -667.781703

|   |           |           |           |
|---|-----------|-----------|-----------|
| C | 2.067768  | 1.978867  | 0.043468  |
| C | 3.239108  | 1.344190  | -0.152150 |
| C | 2.996768  | -0.124599 | -0.478047 |
| C | 1.484868  | -0.254122 | -0.334520 |
| C | 0.666448  | -1.367578 | -0.455162 |
| C | -0.717956 | -1.196550 | -0.308061 |
| C | -1.259854 | 0.074013  | -0.052709 |
| C | -0.422258 | 1.197689  | 0.071059  |
| C | 0.952423  | 1.023047  | -0.063829 |
| H | 1.947909  | 3.039539  | 0.256578  |
| H | 4.237061  | 1.774703  | -0.123212 |
| H | 1.081011  | -2.356907 | -0.648528 |
| H | -1.381966 | -2.053431 | -0.392095 |
| H | -0.865440 | 2.171091  | 0.274096  |
| H | 3.287735  | -0.322541 | -1.523657 |
| N | 3.742381  | -1.029842 | 0.341038  |
| C | 4.366186  | -1.778844 | 0.999469  |
| C | -2.730181 | 0.290042  | 0.102403  |
| O | -3.242735 | 1.371491  | 0.315029  |
| O | -3.443236 | -0.852577 | -0.020321 |

|   |           |           |           |
|---|-----------|-----------|-----------|
| C | -4.869987 | -0.708881 | 0.120339  |
| H | -5.116657 | -0.310186 | 1.111618  |
| H | -5.262342 | -0.032246 | -0.648268 |
| H | -5.276200 | -1.716091 | -0.005022 |

#### COOH-1-NC-IND

Total energy (hartree): -628.619855

Sum of electronic and thermal Free Energies (hartree): -628.504963

|   |           |           |           |
|---|-----------|-----------|-----------|
| C | 1.478804  | 2.021289  | 0.006974  |
| C | 2.697902  | 1.483715  | -0.187374 |
| C | 2.576644  | -0.005401 | -0.486577 |
| C | 1.082216  | -0.258650 | -0.329000 |
| C | 0.359851  | -1.440030 | -0.426153 |
| C | -1.031084 | -1.381736 | -0.272197 |
| C | -1.676107 | -0.157094 | -0.032563 |
| C | -0.937723 | 1.036740  | 0.068740  |
| C | 0.447138  | 0.973599  | -0.074836 |
| H | 1.272219  | 3.072000  | 0.202827  |
| H | 3.656460  | 1.996563  | -0.173769 |
| H | 0.854873  | -2.394122 | -0.606305 |
| H | -1.636055 | -2.284252 | -0.335971 |
| H | -1.444571 | 1.980269  | 0.259086  |
| H | 2.874503  | -0.195751 | -1.531675 |
| N | 3.401265  | -0.831618 | 0.339709  |
| C | 4.091578  | -1.513694 | 1.004434  |
| C | -3.159060 | -0.172298 | 0.113567  |
| O | -3.856486 | -1.162715 | 0.036732  |
| O | -3.683981 | 1.061312  | 0.347296  |
| H | -4.643484 | 0.939212  | 0.425518  |

#### COOH-2-NC-IND

Total energy (hartree): -628.620052

Sum of electronic and thermal Free Energies (hartree): -628.505132

|   |           |           |           |
|---|-----------|-----------|-----------|
| C | 1.529572  | 2.017931  | 0.022221  |
| C | 2.734557  | 1.451681  | -0.178652 |
| C | 2.576741  | -0.031744 | -0.488960 |
| C | 1.076985  | -0.249786 | -0.329405 |
| C | 0.326483  | -1.411835 | -0.431772 |
| C | -1.064203 | -1.322725 | -0.273052 |
| C | -1.677215 | -0.083423 | -0.024722 |
| C | -0.908780 | 1.090665  | 0.081579  |
| C | 0.472276  | 0.996626  | -0.064994 |
| H | 1.348860  | 3.071745  | 0.226316  |
| H | 3.705465  | 1.940707  | -0.163370 |
| H | 0.797972  | -2.376419 | -0.619195 |

|   |           |           |           |
|---|-----------|-----------|-----------|
| H | -1.676667 | -2.218630 | -0.342504 |
| H | -1.407803 | 2.037733  | 0.279559  |
| H | 2.867854  | -0.221275 | -1.536082 |
| N | 3.382673  | -0.884575 | 0.328921  |
| C | 4.056495  | -1.589938 | 0.986191  |
| C | -3.152967 | 0.040027  | 0.140712  |
| O | -3.741785 | 1.080757  | 0.351865  |
| O | -3.806337 | -1.147423 | 0.031052  |
| H | -4.749086 | -0.953373 | 0.154617  |

#### Et-1-NC-IND

Total energy (hartree): -518.648631

Sum of electronic and thermal Free Energies (hartree): -518.493242

|   |           |           |           |
|---|-----------|-----------|-----------|
| C | -1.215572 | 2.015625  | -0.110743 |
| C | -2.415128 | 1.513647  | 0.240706  |
| C | -2.286684 | 0.034181  | 0.583864  |
| C | -0.822683 | -0.254174 | 0.277125  |
| C | -0.104556 | -1.438610 | 0.338209  |
| C | 1.263336  | -1.406003 | 0.023277  |
| C | 1.911170  | -0.213108 | -0.338406 |
| C | 1.164005  | 0.977553  | -0.398944 |
| C | -0.198170 | 0.950994  | -0.097755 |
| H | -1.016218 | 3.053615  | -0.372609 |
| H | -3.360175 | 2.046583  | 0.311270  |
| H | -0.585434 | -2.379783 | 0.606212  |
| H | 1.837206  | -2.333407 | 0.053994  |
| H | 1.648421  | 1.911127  | -0.690424 |
| H | -2.482922 | -0.113134 | 1.659252  |
| N | -3.212368 | -0.800289 | -0.121992 |
| C | -3.982230 | -1.489914 | -0.682827 |
| C | 3.396908  | -0.201999 | -0.629788 |
| H | 3.694061  | -1.176088 | -1.044426 |
| H | 3.610749  | 0.549950  | -1.403624 |
| C | 4.247858  | 0.098306  | 0.616959  |
| H | 5.318017  | 0.100313  | 0.367003  |
| H | 3.993405  | 1.080163  | 1.039493  |
| H | 4.079946  | -0.656310 | 1.397742  |

#### Et-2-NC-IND

Total energy (hartree): -518.647531

Sum of electronic and thermal Free Energies (hartree): -518.491868

|   |           |           |           |
|---|-----------|-----------|-----------|
| C | 1.479563  | 1.988975  | 0.093293  |
| C | 2.628424  | 1.330283  | -0.152224 |
| C | 2.337849  | -0.123078 | -0.508720 |
| C | 0.827390  | -0.214349 | -0.331730 |
| C | -0.034660 | -1.289187 | -0.462256 |

|   |           |           |           |
|---|-----------|-----------|-----------|
| C | -1.412039 | -1.074796 | -0.270253 |
| C | -1.925249 | 0.193510  | 0.039018  |
| C | -1.029555 | 1.274690  | 0.168282  |
| C | 0.335822  | 1.067013  | -0.009231 |
| H | 1.396994  | 3.046602  | 0.339006  |
| H | 3.637995  | 1.733804  | -0.137771 |
| H | 0.335888  | -2.287590 | -0.696197 |
| H | -2.086753 | -1.923490 | -0.365127 |
| H | -1.410381 | 2.268139  | 0.412805  |
| H | 2.606914  | -0.305233 | -1.562686 |
| N | 3.081051  | -1.064060 | 0.274946  |
| C | 3.701072  | -1.842352 | 0.901428  |
| C | -3.409553 | 0.449761  | 0.244499  |
| H | -3.542200 | 0.910127  | 1.236296  |
| H | -3.727144 | 1.218464  | -0.477933 |
| C | -4.336720 | -0.761208 | 0.126680  |
| H | -5.377324 | -0.456344 | 0.299383  |
| H | -4.285883 | -1.216795 | -0.872119 |
| H | -4.089520 | -1.534841 | 0.867002  |

#### Et-3-NC-IND

Total energy (hartree): -518.648636

Sum of electronic and thermal Free Energies (hartree): -518.493269

|   |           |           |           |
|---|-----------|-----------|-----------|
| C | 1.256672  | 2.011218  | 0.115830  |
| C | 2.478008  | 1.457187  | -0.009174 |
| C | 2.352912  | -0.007015 | -0.413262 |
| C | 0.845739  | -0.229123 | -0.403393 |
| C | 0.100204  | -1.372024 | -0.649683 |
| C | -1.300042 | -1.275320 | -0.613930 |
| C | -1.951353 | -0.060056 | -0.344838 |
| C | -1.177225 | 1.088905  | -0.099711 |
| C | 0.214888  | 0.998096  | -0.122411 |
| H | 1.056517  | 3.052691  | 0.362836  |
| H | 3.441598  | 1.943494  | 0.121642  |
| H | 0.580783  | -2.328019 | -0.859506 |
| H | -1.898587 | -2.167417 | -0.804474 |
| H | -1.666509 | 2.042515  | 0.106061  |
| H | 2.746646  | -0.142275 | -1.434693 |
| N | 3.086034  | -0.900163 | 0.433021  |
| C | 3.700773  | -1.638296 | 1.111277  |
| C | -3.462767 | 0.004793  | -0.280229 |
| H | -3.801179 | 0.986322  | -0.643883 |
| H | -3.888569 | -0.748105 | -0.959248 |
| C | -4.011426 | -0.225745 | 1.139163  |
| H | -5.109068 | -0.172082 | 1.145806  |
| H | -3.714387 | -1.212835 | 1.519294  |

|   |           |          |          |
|---|-----------|----------|----------|
| H | -3.627790 | 0.531134 | 1.837185 |
|---|-----------|----------|----------|

#### F-NC-IND

Total energy (hartree): -539.261436

Sum of electronic and thermal Free Energies (hartree): -539.166739

|   |           |           |           |
|---|-----------|-----------|-----------|
| C | -0.782226 | 2.020565  | -0.069420 |
| C | -1.992463 | 1.490619  | 0.191516  |
| C | -1.860890 | 0.009455  | 0.524339  |
| C | -0.375117 | -0.250033 | 0.313856  |
| C | 0.354435  | -1.425931 | 0.415680  |
| C | 1.741519  | -1.380474 | 0.203132  |
| C | 2.338016  | -0.157590 | -0.094477 |
| C | 1.629749  | 1.038236  | -0.205302 |
| C | 0.249753  | 0.972916  | -0.001763 |
| H | -0.583406 | 3.065074  | -0.303117 |
| H | -2.950109 | 2.005397  | 0.203085  |
| H | -0.129853 | -2.375428 | 0.643840  |
| H | 2.356885  | -2.276467 | 0.264563  |
| H | 2.148595  | 1.964885  | -0.444860 |
| H | -2.125271 | -0.152632 | 1.582895  |
| N | -2.721591 | -0.831192 | -0.251233 |
| C | -3.438894 | -1.527898 | -0.870409 |
| F | 3.683446  | -0.127964 | -0.292298 |

#### H-NC-IND

Total energy (hartree): -440.011320

Sum of electronic and thermal Free Energies (hartree): -439.907080

|   |           |           |           |
|---|-----------|-----------|-----------|
| C | -0.328572 | 2.017896  | -0.078283 |
| C | -1.543807 | 1.522835  | 0.225136  |
| C | -1.441241 | 0.036918  | 0.547132  |
| C | 0.028666  | -0.264218 | 0.279281  |
| C | 0.723567  | -1.462898 | 0.348795  |
| C | 2.102845  | -1.448025 | 0.081964  |
| C | 2.755883  | -0.251358 | -0.237292 |
| C | 2.049731  | 0.957603  | -0.308199 |
| C | 0.676482  | 0.942087  | -0.053941 |
| H | -0.109520 | 3.058016  | -0.314679 |
| H | -2.485238 | 2.064471  | 0.275380  |
| H | 0.216728  | -2.397396 | 0.591036  |
| H | 2.669874  | -2.378219 | 0.122814  |
| H | 2.563301  | 1.885498  | -0.561074 |
| H | -1.667197 | -0.124496 | 1.614669  |
| N | -2.353796 | -0.777591 | -0.196700 |
| C | -3.113383 | -1.451276 | -0.790101 |
| H | 3.827600  | -0.262112 | -0.438203 |



iPr-1-NC-IND

Total energy (hartree): -557.965223

Sum of electronic and thermal Free Energies (hartree): -557.783547

|   |           |           |           |
|---|-----------|-----------|-----------|
| C | 1.742298  | 1.993442  | 0.228101  |
| C | 2.911313  | 1.385949  | -0.052564 |
| C | 2.662565  | -0.045272 | -0.513955 |
| C | 1.154383  | -0.189705 | -0.357155 |
| C | 0.322870  | -1.279068 | -0.574685 |
| C | -1.057103 | -1.115401 | -0.382826 |
| C | -1.609632 | 0.116039  | 0.012446  |
| C | -0.749736 | 1.206704  | 0.227530  |
| C | 0.626473  | 1.049204  | 0.049264  |
| H | 1.627504  | 3.028344  | 0.546646  |
| H | 3.909126  | 1.814556  | -0.000415 |
| H | 0.724980  | -2.246866 | -0.875734 |
| H | -1.712306 | -1.971227 | -0.545479 |
| H | -1.160285 | 2.168971  | 0.537847  |
| H | 2.941895  | -0.142887 | -1.576570 |
| N | 3.426381  | -1.020506 | 0.204853  |
| C | 4.064150  | -1.825357 | 0.777763  |
| C | -3.111262 | 0.270757  | 0.213331  |
| H | -3.284726 | 1.315545  | 0.514050  |
| C | -3.633619 | -0.627292 | 1.349487  |
| H | -4.702893 | -0.442897 | 1.524355  |
| H | -3.512783 | -1.691653 | 1.103131  |
| H | -3.094295 | -0.435309 | 2.286530  |
| C | -3.894253 | 0.032458  | -1.090612 |
| H | -3.784392 | -1.004759 | -1.437537 |
| H | -4.965691 | 0.221858  | -0.935422 |
| H | -3.541492 | 0.695131  | -1.892130 |

iPr-2-NC-IND

Total energy (hartree): -557.965313

Sum of electronic and thermal Free Energies (hartree): -557.783786

|   |           |           |           |
|---|-----------|-----------|-----------|
| C | 1.424172  | 2.010313  | 0.132539  |
| C | 2.679152  | 1.573027  | -0.086205 |
| C | 2.662380  | 0.102695  | -0.487422 |
| C | 1.187372  | -0.259321 | -0.367576 |
| C | 0.535818  | -1.467308 | -0.555655 |
| C | -0.861404 | -1.500540 | -0.409765 |
| C | -1.603194 | -0.352623 | -0.089356 |
| C | -0.921024 | 0.864938  | 0.099405  |
| C | 0.466295  | 0.904072  | -0.033706 |
| H | 1.146773  | 3.029025  | 0.399172  |
| H | 3.599903  | 2.148054  | -0.025898 |
| H | 1.085373  | -2.377036 | -0.799020 |

|   |           |           |           |
|---|-----------|-----------|-----------|
| H | -1.385677 | -2.447068 | -0.548657 |
| H | -1.469754 | 1.772130  | 0.354030  |
| H | 2.991227  | 0.002704  | -1.535486 |
| N | 3.535955  | -0.716038 | 0.298705  |
| C | 4.264820  | -1.391590 | 0.927253  |
| C | -3.116390 | -0.432095 | 0.059188  |
| H | -3.401081 | -1.474791 | -0.148903 |
| C | -3.843379 | 0.456743  | -0.966139 |
| H | -4.931481 | 0.324882  | -0.885601 |
| H | -3.622492 | 1.520698  | -0.799529 |
| H | -3.542872 | 0.206297  | -1.992235 |
| C | -3.568179 | -0.110237 | 1.495440  |
| H | -3.337303 | 0.930968  | 1.762260  |
| H | -4.653727 | -0.248783 | 1.597298  |
| H | -3.069207 | -0.763249 | 2.223623  |

#### Me-NC-IND

Total energy (hartree): -479.331856

Sum of electronic and thermal Free Energies (hartree): -479.203348

|   |           |           |           |
|---|-----------|-----------|-----------|
| C | 0.817928  | 2.015286  | 0.069468  |
| C | 2.032164  | 1.490390  | -0.184012 |
| C | 1.906702  | 0.008597  | -0.518585 |
| C | 0.419467  | -0.253999 | -0.319326 |
| C | -0.312452 | -1.425113 | -0.427361 |
| C | -1.701647 | -1.366025 | -0.221700 |
| C | -2.353603 | -0.160601 | 0.079645  |
| C | -1.592258 | 1.019385  | 0.186328  |
| C | -0.212666 | 0.966034  | -0.006143 |
| H | 0.616270  | 3.059616  | 0.302983  |
| H | 2.988434  | 2.007865  | -0.188704 |
| H | 0.169228  | -2.376563 | -0.654504 |
| H | -2.288418 | -2.282304 | -0.297473 |
| H | -2.082492 | 1.965391  | 0.423015  |
| H | 2.180694  | -0.155211 | -1.574363 |
| N | 2.763658  | -0.830044 | 0.264871  |
| C | 3.477641  | -1.523551 | 0.890963  |
| C | -3.848671 | -0.119860 | 0.295960  |
| H | -4.092362 | 0.214398  | 1.315304  |
| H | -4.331326 | 0.581961  | -0.399897 |
| H | -4.301257 | -1.108096 | 0.148118  |

#### MeS-NC-IND

Total energy (hartree): -877.536196

Sum of electronic and thermal Free Energies (hartree): -877.408711

|   |           |          |           |
|---|-----------|----------|-----------|
| C | -1.792433 | 1.982682 | -0.066535 |
| C | -2.944837 | 1.323893 | 0.160396  |

|   |           |           |           |
|---|-----------|-----------|-----------|
| C | -2.663227 | -0.134851 | 0.501712  |
| C | -1.152561 | -0.228710 | 0.338014  |
| C | -0.293808 | -1.307697 | 0.462437  |
| C | 1.086143  | -1.104087 | 0.287587  |
| C | 1.591471  | 0.173866  | -0.000422 |
| C | 0.711765  | 1.269294  | -0.127880 |
| C | -0.653222 | 1.055028  | 0.035664  |
| H | -1.703432 | 3.042699  | -0.298748 |
| H | -3.952992 | 1.730827  | 0.141252  |
| H | -0.668801 | -2.308111 | 0.680216  |
| H | 1.754948  | -1.956262 | 0.378501  |
| H | 1.100052  | 2.262081  | -0.356851 |
| H | -2.945563 | -0.328839 | 1.550160  |
| N | -3.402204 | -1.062579 | -0.301974 |
| C | -4.017663 | -1.831891 | -0.944049 |
| S | 3.325404  | 0.533499  | -0.231223 |
| C | 4.135825  | -1.088897 | -0.029532 |
| H | 3.978285  | -1.493051 | 0.977826  |
| H | 3.796233  | -1.802115 | -0.790386 |
| H | 5.205517  | -0.896944 | -0.172939 |

MeSO<sub>2</sub>-NC-IND

Total energy (hartree): -1027.936300

Sum of electronic and thermal Free Energies (hartree): -1027.802896

|   |           |           |           |
|---|-----------|-----------|-----------|
| C | -2.114739 | 2.022102  | -0.087085 |
| C | -3.322945 | 1.478562  | 0.153535  |
| C | -3.178677 | 0.006105  | 0.516073  |
| C | -1.685129 | -0.238613 | 0.338542  |
| C | -0.953936 | -1.412027 | 0.455577  |
| C | 0.436414  | -1.353478 | 0.267752  |
| C | 1.038294  | -0.125554 | -0.018610 |
| C | 0.312243  | 1.063640  | -0.154291 |
| C | -1.070092 | 0.990665  | 0.023247  |
| H | -1.923622 | 3.064590  | -0.334581 |
| H | -4.287886 | 1.979066  | 0.134654  |
| H | -1.439707 | -2.364536 | 0.666553  |
| H | 1.046374  | -2.253885 | 0.316260  |
| H | 0.818679  | 1.990509  | -0.418912 |
| H | -3.451064 | -0.137642 | 1.575643  |
| N | -4.011735 | -0.865882 | -0.251104 |
| C | -4.710607 | -1.587004 | -0.864015 |
| S | 2.840157  | -0.071889 | -0.244118 |
| O | 3.295230  | -1.434095 | -0.650610 |
| O | 3.159538  | 1.127236  | -1.074806 |
| C | 3.482284  | 0.239292  | 1.428310  |
| H | 4.571484  | 0.279793  | 1.318185  |

|   |          |           |          |
|---|----------|-----------|----------|
| H | 3.086131 | 1.197275  | 1.779606 |
| H | 3.182428 | -0.591050 | 2.075331 |

NH<sub>2</sub>-NC-IND

Total energy (hartree): -495.380737

Sum of electronic and thermal Free Energies (hartree): -495.261729

|   |           |           |           |
|---|-----------|-----------|-----------|
| C | -0.801698 | 2.012655  | -0.063652 |
| C | -2.014283 | 1.487672  | 0.197080  |
| C | -1.888082 | 0.004109  | 0.525221  |
| C | -0.404028 | -0.256652 | 0.317480  |
| C | 0.338701  | -1.424407 | 0.420118  |
| C | 1.722333  | -1.370800 | 0.209441  |
| C | 2.366800  | -0.154676 | -0.094326 |
| C | 1.605082  | 1.028168  | -0.197302 |
| C | 0.228290  | 0.961815  | 0.002742  |
| H | -0.601388 | 3.057367  | -0.297040 |
| H | -2.970263 | 2.005754  | 0.207731  |
| H | -0.136360 | -2.378781 | 0.649451  |
| H | 2.313376  | -2.285410 | 0.273973  |
| H | 2.092048  | 1.973739  | -0.440595 |
| H | -2.165315 | -0.163882 | 1.579582  |
| N | -2.752587 | -0.826211 | -0.261741 |
| C | -3.471052 | -1.515736 | -0.886928 |
| N | 3.738394  | -0.131710 | -0.357710 |
| H | 4.198409  | 0.761222  | -0.241320 |
| H | 4.276475  | -0.897466 | 0.025130  |

NHNH<sub>2</sub>-NC-IND

Total energy (hartree): -550.704784

Sum of electronic and thermal Free Energies (hartree): -550.570357

|   |           |           |           |
|---|-----------|-----------|-----------|
| C | -1.408497 | 1.994653  | -0.052196 |
| C | -2.566289 | 1.360519  | 0.214960  |
| C | -2.303553 | -0.107576 | 0.531739  |
| C | -0.803286 | -0.232098 | 0.310636  |
| C | 0.044459  | -1.325932 | 0.403881  |
| C | 1.418638  | -1.152648 | 0.184678  |
| C | 1.940132  | 0.117982  | -0.121704 |
| C | 1.075689  | 1.231020  | -0.209263 |
| C | -0.287180 | 1.041119  | -0.001865 |
| H | -1.306180 | 3.054629  | -0.280394 |
| H | -3.565210 | 1.789608  | 0.236331  |
| H | -0.341030 | -2.319843 | 0.634074  |
| H | 2.098384  | -1.998310 | 0.244327  |
| H | 1.473610  | 2.219091  | -0.448050 |
| H | -2.555903 | -0.307627 | 1.586689  |
| N | -3.096624 | -1.006673 | -0.255229 |

|   |           |           |           |
|---|-----------|-----------|-----------|
| C | -3.756484 | -1.752008 | -0.880878 |
| N | 3.300635  | 0.308451  | -0.406971 |
| H | 3.605948  | 1.270647  | -0.300242 |
| N | 4.209918  | -0.668677 | 0.052146  |
| H | 4.619601  | -0.412172 | 0.950739  |
| H | 4.951500  | -0.777919 | -0.633027 |

NMe<sub>2</sub>-NC-IND

Total energy (hartree): -573.992710

Sum of electronic and thermal Free Energies (hartree): -573.822075

|   |           |           |           |
|---|-----------|-----------|-----------|
| C | 1.572719  | 2.004067  | -0.016463 |
| C | 2.787024  | 1.461055  | -0.227185 |
| C | 2.656366  | -0.033116 | -0.503244 |
| C | 1.165622  | -0.272533 | -0.324758 |
| C | 0.406548  | -1.430041 | -0.410596 |
| C | -0.980897 | -1.357563 | -0.238412 |
| C | -1.634845 | -0.124595 | 0.020915  |
| C | -0.843854 | 1.053488  | 0.091604  |
| C | 0.535340  | 0.959047  | -0.069893 |
| H | 1.375916  | 3.058407  | 0.172938  |
| H | 3.747309  | 1.971218  | -0.232436 |
| H | 0.871181  | -2.398030 | -0.601483 |
| H | -1.555067 | -2.277065 | -0.306043 |
| H | -1.296810 | 2.024001  | 0.275435  |
| H | 2.962057  | -0.244055 | -1.541870 |
| N | 3.492525  | -0.839055 | 0.339148  |
| C | 4.186988  | -1.509157 | 1.010627  |
| N | -3.006619 | -0.072165 | 0.215188  |
| C | -3.814432 | -1.255275 | -0.028157 |
| H | -4.861018 | -1.023722 | 0.191313  |
| H | -3.749275 | -1.606147 | -1.073943 |
| H | -3.511669 | -2.083006 | 0.629653  |
| C | -3.670915 | 1.217221  | 0.298593  |
| H | -3.545903 | 1.819003  | -0.619767 |
| H | -4.741115 | 1.057580  | 0.460407  |
| H | -3.290936 | 1.804775  | 1.147257  |

NO-1-NC-IND

Total energy (hartree): -569.323175

Sum of electronic and thermal Free Energies (hartree): -569.225270

|   |           |           |           |
|---|-----------|-----------|-----------|
| C | -1.281752 | 2.015051  | -0.089691 |
| C | -2.445865 | 1.385286  | 0.157033  |
| C | -2.192273 | -0.075180 | 0.508313  |
| C | -0.686533 | -0.210936 | 0.317592  |
| C | 0.128695  | -1.333952 | 0.438914  |
| C | 1.504136  | -1.180179 | 0.248105  |

|   |           |           |           |
|---|-----------|-----------|-----------|
| C | 2.027453  | 0.089308  | -0.051735 |
| C | 1.208004  | 1.221759  | -0.179646 |
| C | -0.164884 | 1.059775  | 0.001989  |
| H | -1.167992 | 3.070700  | -0.329018 |
| H | -3.444394 | 1.815207  | 0.151512  |
| H | -0.293446 | -2.312883 | 0.666526  |
| H | 2.187112  | -2.024466 | 0.326578  |
| H | 1.663123  | 2.182841  | -0.418575 |
| H | -2.442840 | -0.245240 | 1.569486  |
| N | -2.964733 | -1.001487 | -0.258617 |
| C | -3.611376 | -1.766799 | -0.875266 |
| N | 3.436421  | 0.338974  | -0.257115 |
| O | 4.160374  | -0.634170 | -0.151254 |

#### NO-2-NC-IND

Total energy (hartree): -569.323789

Sum of electronic and thermal Free Energies (hartree): -569.225765

|   |           |           |           |
|---|-----------|-----------|-----------|
| C | 0.971837  | 2.025940  | 0.022988  |
| C | 2.220323  | 1.567680  | -0.185460 |
| C | 2.194275  | 0.076580  | -0.496262 |
| C | 0.721236  | -0.275970 | -0.327090 |
| C | 0.086787  | -1.505432 | -0.423465 |
| C | -1.305192 | -1.540378 | -0.253952 |
| C | -2.014625 | -0.358216 | -0.003181 |
| C | -1.373220 | 0.890734  | 0.100161  |
| C | 0.006599  | 0.916763  | -0.057219 |
| H | 0.700259  | 3.059625  | 0.228828  |
| H | 3.144218  | 2.140836  | -0.176001 |
| H | 0.647497  | -2.420239 | -0.613466 |
| H | -1.861832 | -2.475403 | -0.312956 |
| H | -1.962590 | 1.783739  | 0.302217  |
| H | 2.492857  | -0.086403 | -1.545833 |
| N | 3.076913  | -0.701912 | 0.315430  |
| C | 3.815170  | -1.344483 | 0.968283  |
| N | -3.440615 | -0.532220 | 0.143029  |
| O | -4.069204 | 0.489683  | 0.354897  |

#### NO<sub>2</sub>-NC-IND

Total energy (hartree): -644.548322

Sum of electronic and thermal Free Energies (hartree): -644.445853

|   |           |           |           |
|---|-----------|-----------|-----------|
| C | 1.469899  | 2.022781  | 0.020760  |
| C | 2.680302  | 1.469103  | -0.182014 |
| C | 2.539490  | -0.015833 | -0.491533 |
| C | 1.043203  | -0.251557 | -0.328513 |
| C | 0.308305  | -1.424644 | -0.427951 |
| C | -1.082865 | -1.357691 | -0.268123 |

|   |           |           |           |
|---|-----------|-----------|-----------|
| C | -1.681639 | -0.119931 | -0.022531 |
| C | -0.957176 | 1.072505  | 0.085930  |
| C | 0.425621  | 0.988632  | -0.064128 |
| H | 1.276589  | 3.074274  | 0.224260  |
| H | 3.645586  | 1.969115  | -0.168838 |
| H | 0.791339  | -2.383198 | -0.614822 |
| H | -1.704485 | -2.246788 | -0.331800 |
| H | -1.473637 | 2.008158  | 0.283727  |
| H | 2.827995  | -0.200406 | -1.540406 |
| N | 3.356007  | -0.859939 | 0.322995  |
| C | 4.039749  | -1.557890 | 0.978487  |
| N | -3.151408 | -0.065810 | 0.135436  |
| O | -3.777136 | -1.118376 | 0.043616  |
| O | -3.660978 | 1.031655  | 0.348452  |

#### OCF<sub>3</sub>-1-NC-IND

Total energy (hartree): -852.327447

Sum of electronic and thermal Free Energies (hartree): -852.222424

|   |           |           |           |
|---|-----------|-----------|-----------|
| C | 1.859121  | 1.990610  | -0.046230 |
| C | 3.151787  | 1.638910  | -0.182984 |
| C | 3.267001  | 0.144211  | -0.455269 |
| C | 1.822416  | -0.325487 | -0.351618 |
| C | 1.276452  | -1.597094 | -0.453333 |
| C | -0.113061 | -1.739800 | -0.352580 |
| C | -0.918920 | -0.613695 | -0.161906 |
| C | -0.387238 | 0.675654  | -0.055137 |
| C | 1.001548  | 0.797768  | -0.146073 |
| H | 1.489711  | 3.001010  | 0.120098  |
| H | 4.021281  | 2.290394  | -0.142531 |
| H | 1.903852  | -2.476561 | -0.596420 |
| H | -0.584929 | -2.718400 | -0.419205 |
| H | -1.014745 | 1.548879  | 0.095862  |
| H | 3.639656  | -0.012969 | -1.481523 |
| N | 4.170811  | -0.532837 | 0.423600  |
| C | 4.926065  | -1.093815 | 1.129531  |
| O | -2.287193 | -0.914298 | -0.092738 |
| C | -3.218061 | 0.037480  | 0.135477  |
| F | -3.249089 | 0.991709  | -0.827732 |
| F | -3.045117 | 0.676643  | 1.317677  |
| F | -4.411973 | -0.565748 | 0.159072  |

#### OCF<sub>3</sub>-2-NC-IND

Total energy (hartree): -852.327326

Sum of electronic and thermal Free Energies (hartree): -852.222247

|   |           |          |           |
|---|-----------|----------|-----------|
| C | -2.536947 | 1.983981 | -0.132437 |
| C | -3.647588 | 1.260397 | 0.104960  |

|   |           |           |           |
|---|-----------|-----------|-----------|
| C | -3.279234 | -0.166850 | 0.492131  |
| C | -1.763889 | -0.171181 | 0.341885  |
| C | -0.844222 | -1.193424 | 0.504811  |
| C | 0.524272  | -0.920261 | 0.336563  |
| C | 0.924536  | 0.379075  | 0.015869  |
| C | 0.007466  | 1.422673  | -0.154087 |
| C | -1.344969 | 1.131441  | 0.006005  |
| H | -2.511060 | 3.040096  | -0.394932 |
| H | -4.678796 | 1.602871  | 0.066285  |
| H | -1.160794 | -2.207154 | 0.749403  |
| H | 1.247414  | -1.720629 | 0.457976  |
| H | 0.365324  | 2.418803  | -0.408601 |
| H | -3.554592 | -0.343932 | 1.545445  |
| N | -3.950475 | -1.163484 | -0.285432 |
| C | -4.513601 | -1.989031 | -0.905881 |
| O | 2.256648  | 0.777867  | -0.167222 |
| C | 3.283969  | -0.097012 | -0.090693 |
| F | 3.198232  | -1.096859 | -0.999957 |
| F | 3.395430  | -0.678982 | 1.128389  |
| F | 4.410103  | 0.586125  | -0.327824 |

OCF<sub>3</sub>-3-NC-IND

Total energy (hartree): -852.327706

Sum of electronic and thermal Free Energies (hartree): -852.223074

|   |           |           |           |
|---|-----------|-----------|-----------|
| C | 2.174830  | 2.015279  | 0.103412  |
| C | 3.389720  | 1.434658  | 0.088762  |
| C | 3.274235  | -0.024375 | -0.334344 |
| C | 1.768335  | -0.217116 | -0.463919 |
| C | 1.033942  | -1.350311 | -0.780910 |
| C | -0.362490 | -1.240683 | -0.872429 |
| C | -0.969019 | -0.005209 | -0.648184 |
| C | -0.245309 | 1.147777  | -0.336454 |
| C | 1.141218  | 1.023724  | -0.235586 |
| H | 1.971996  | 3.058923  | 0.336841  |
| H | 4.346719  | 1.900463  | 0.310592  |
| H | 1.517971  | -2.312222 | -0.948452 |
| H | -0.979155 | -2.102639 | -1.119104 |
| H | -0.758871 | 2.094385  | -0.180732 |
| H | 3.753839  | -0.159707 | -1.318518 |
| N | 3.907870  | -0.937855 | 0.565933  |
| C | 4.444636  | -1.693393 | 1.290359  |
| O | -2.364669 | 0.100629  | -0.831813 |
| C | -3.156667 | -0.055423 | 0.254946  |
| F | -2.914383 | 0.865665  | 1.219518  |
| F | -3.018970 | -1.270533 | 0.836302  |
| F | -4.427849 | 0.079444  | -0.142661 |



OH-1-NC-IND

Total energy (hartree): -515.248546

Sum of electronic and thermal Free Energies (hartree): -515.141485

|   |           |           |           |
|---|-----------|-----------|-----------|
| C | -0.799321 | 2.015507  | -0.069128 |
| C | -2.008555 | 1.483299  | 0.192089  |
| C | -1.874214 | 0.001963  | 0.525337  |
| C | -0.388094 | -0.251978 | 0.317790  |
| C | 0.352955  | -1.418944 | 0.420680  |
| C | 1.739022  | -1.360786 | 0.207351  |
| C | 2.358812  | -0.139853 | -0.096089 |
| C | 1.613033  | 1.044344  | -0.202550 |
| C | 0.236646  | 0.971230  | 0.000179  |
| H | -0.603871 | 3.060495  | -0.304246 |
| H | -2.967481 | 1.995855  | 0.202157  |
| H | -0.120836 | -2.373652 | 0.650197  |
| H | 2.338541  | -2.270423 | 0.275938  |
| H | 2.118668  | 1.978454  | -0.443181 |
| H | -2.146559 | -0.162958 | 1.581367  |
| N | -2.732208 | -0.838361 | -0.256387 |
| C | -3.445280 | -1.536195 | -0.878767 |
| O | 3.709551  | -0.038010 | -0.306426 |
| H | 4.120565  | -0.906676 | -0.217457 |

OH-2-NC-IND

Total energy (hartree): -515.248181

Sum of electronic and thermal Free Energies (hartree): -515.141138

|   |           |           |           |
|---|-----------|-----------|-----------|
| C | -0.783096 | 2.016190  | -0.063709 |
| C | -1.996986 | 1.493748  | 0.196067  |
| C | -1.873814 | 0.010354  | 0.524213  |
| C | -0.389751 | -0.255134 | 0.316389  |
| C | 0.343977  | -1.429781 | 0.418460  |
| C | 1.728035  | -1.386395 | 0.208183  |
| C | 2.358597  | -0.170406 | -0.092512 |
| C | 1.622958  | 1.020516  | -0.198053 |
| C | 0.242909  | 0.962060  | 0.002966  |
| H | -0.579401 | 3.060450  | -0.295627 |
| H | -2.951582 | 2.014222  | 0.207433  |
| H | -0.139452 | -2.380105 | 0.646089  |
| H | 2.334884  | -2.288336 | 0.272052  |
| H | 2.120953  | 1.962542  | -0.435432 |
| H | -2.146726 | -0.155393 | 1.580021  |
| N | -2.739096 | -0.819667 | -0.259970 |
| C | -3.459360 | -1.507549 | -0.885193 |
| O | 3.716286  | -0.208957 | -0.278486 |
| H | 4.043894  | 0.674327  | -0.487720 |

OMe-1-NC-IND

Total energy (hartree): -554.549141

Sum of electronic and thermal Free Energies (hartree): -554.416020

|   |           |           |           |
|---|-----------|-----------|-----------|
| C | 1.021480  | 2.012329  | -0.006886 |
| C | 2.285264  | 1.589834  | -0.202474 |
| C | 2.299737  | 0.093285  | -0.491289 |
| C | 0.835830  | -0.291023 | -0.333085 |
| C | 0.205135  | -1.526996 | -0.426869 |
| C | -1.181811 | -1.589191 | -0.269429 |
| C | -1.930993 | -0.422448 | -0.027936 |
| C | -1.298616 | 0.828988  | 0.067948  |
| C | 0.091259  | 0.872659  | -0.081366 |
| H | 0.720542  | 3.041170  | 0.185095  |
| H | 3.192419  | 2.189137  | -0.192558 |
| H | 0.772696  | -2.440215 | -0.607157 |
| H | -1.710743 | -2.539343 | -0.328004 |
| H | -1.859842 | 1.740562  | 0.257333  |
| H | 2.627668  | -0.076061 | -1.530790 |
| N | 3.198607  | -0.640958 | 0.348838  |
| C | 3.947502  | -1.249598 | 1.020712  |
| O | -3.277774 | -0.610851 | 0.102746  |
| C | -4.097160 | 0.524144  | 0.361761  |
| H | -3.821141 | 1.007160  | 1.311802  |
| H | -4.035361 | 1.257138  | -0.457482 |
| H | -5.120059 | 0.142078  | 0.431401  |

OMe-2-NC-IND

Total energy (hartree): -554.549400

Sum of electronic and thermal Free Energies (hartree): -554.416281

|   |           |           |           |
|---|-----------|-----------|-----------|
| C | -1.419901 | 1.994179  | -0.091418 |
| C | -2.573606 | 1.346991  | 0.160875  |
| C | -2.298365 | -0.110226 | 0.514445  |
| C | -0.790951 | -0.217093 | 0.331482  |
| C | 0.062322  | -1.298564 | 0.459923  |
| C | 1.443085  | -1.111630 | 0.264657  |
| C | 1.944289  | 0.161988  | -0.048482 |
| C | 1.076403  | 1.263651  | -0.179946 |
| C | -0.285834 | 1.059761  | 0.005042  |
| H | -1.326856 | 3.050666  | -0.337779 |
| H | -3.578833 | 1.761535  | 0.151362  |
| H | -0.316777 | -2.292969 | 0.697079  |
| H | 2.108705  | -1.965511 | 0.358646  |
| H | 1.491117  | 2.239963  | -0.427274 |
| H | -2.571175 | -0.291958 | 1.567470  |
| N | -3.056214 | -1.038773 | -0.271733 |

|   |           |           |           |
|---|-----------|-----------|-----------|
| C | -3.686767 | -1.808498 | -0.898298 |
| O | 3.266988  | 0.438092  | -0.250005 |
| C | 4.206185  | -0.626951 | -0.142824 |
| H | 4.200461  | -1.063984 | 0.867532  |
| H | 4.004863  | -1.412905 | -0.886761 |
| H | 5.184935  | -0.179809 | -0.340847 |

#### SH-1-NC-IND

Total energy (hartree): -838.221422

Sum of electronic and thermal Free Energies (hartree): -838.121079

|   |           |           |           |
|---|-----------|-----------|-----------|
| C | -1.215392 | 2.015639  | -0.063530 |
| C | -2.428850 | 1.477981  | 0.164513  |
| C | -2.296784 | -0.002467 | 0.502219  |
| C | -0.804349 | -0.250282 | 0.333399  |
| C | -0.061753 | -1.414950 | 0.454177  |
| C | 1.329085  | -1.352158 | 0.278558  |
| C | 1.959909  | -0.130759 | -0.007120 |
| C | 1.204317  | 1.049538  | -0.131758 |
| C | -0.177846 | 0.975028  | 0.033882  |
| H | -1.017975 | 3.061484  | -0.293035 |
| H | -3.389989 | 1.986166  | 0.148958  |
| H | -0.537710 | -2.371874 | 0.669844  |
| H | 1.919437  | -2.263694 | 0.365573  |
| H | 1.691280  | 1.998194  | -0.358366 |
| H | -2.591332 | -0.167062 | 1.552435  |
| N | -3.129506 | -0.849222 | -0.298003 |
| C | -3.823082 | -1.551554 | -0.937340 |
| S | 3.731150  | 0.006904  | -0.231242 |
| H | 4.022893  | -1.305213 | -0.061508 |

#### SH-2-NC-IND

Total energy (hartree): -838.221324

Sum of electronic and thermal Free Energies (hartree): -838.121171

|   |           |           |           |
|---|-----------|-----------|-----------|
| C | -1.215340 | 2.016465  | -0.061306 |
| C | -2.428754 | 1.478945  | 0.167159  |
| C | -2.296566 | -0.001991 | 0.502267  |
| C | -0.804126 | -0.249775 | 0.332845  |
| C | -0.061371 | -1.414942 | 0.453763  |
| C | 1.328365  | -1.351101 | 0.277284  |
| C | 1.959764  | -0.128690 | -0.007725 |
| C | 1.205077  | 1.051061  | -0.131221 |
| C | -0.177913 | 0.975395  | 0.034062  |
| H | -1.018150 | 3.062685  | -0.289522 |
| H | -3.389756 | 1.987409  | 0.152835  |
| H | -0.537361 | -2.371853 | 0.668989  |
| H | 1.923099  | -2.260671 | 0.361174  |

|   |           |           |           |
|---|-----------|-----------|-----------|
| H | 1.687700  | 2.002174  | -0.354964 |
| H | -2.590831 | -0.168540 | 1.552247  |
| N | -3.129751 | -0.846591 | -0.299635 |
| C | -3.824416 | -1.546038 | -0.940972 |
| S | 3.739442  | -0.153980 | -0.204118 |
| H | 3.894167  | 1.162628  | -0.484366 |

SiH<sub>3</sub>-NC-IND

Total energy (hartree): -730.718730

Sum of electronic and thermal Free Energies (hartree): -730.604573

|    |           |           |           |
|----|-----------|-----------|-----------|
| C  | 1.257134  | 2.017903  | 0.070057  |
| C  | 2.470927  | 1.478877  | -0.153138 |
| C  | 2.336603  | 0.000116  | -0.496028 |
| C  | 0.841733  | -0.246823 | -0.332917 |
| C  | 0.105846  | -1.413706 | -0.460221 |
| C  | -1.287804 | -1.343505 | -0.288933 |
| C  | -1.940327 | -0.128955 | -0.003397 |
| C  | -1.167417 | 1.045869  | 0.123518  |
| C  | 0.216823  | 0.980663  | -0.034172 |
| H  | 1.061124  | 3.063833  | 0.300608  |
| H  | 3.433076  | 1.984832  | -0.132572 |
| H  | 0.587880  | -2.367816 | -0.675394 |
| H  | -1.871435 | -2.260324 | -0.381758 |
| H  | -1.643610 | 2.002455  | 0.347891  |
| H  | 2.628421  | -0.162099 | -1.547373 |
| N  | 3.163836  | -0.853885 | 0.300670  |
| C  | 3.854480  | -1.559918 | 0.939143  |
| Si | -3.820192 | -0.076998 | 0.213371  |
| H  | -4.179904 | 0.400311  | 1.583768  |
| H  | -4.371890 | -1.448787 | 0.005855  |
| H  | -4.435809 | 0.859633  | -0.776378 |

SiMe<sub>3</sub>-NC-IND

Total energy (hartree): -848.711400

Sum of electronic and thermal Free Energies (hartree): -848.518066

|   |           |           |           |
|---|-----------|-----------|-----------|
| C | 2.213753  | 2.008412  | 0.060662  |
| C | 3.432670  | 1.470247  | -0.136061 |
| C | 3.305554  | -0.008000 | -0.484335 |
| C | 1.807327  | -0.254502 | -0.356387 |
| C | 1.071128  | -1.419114 | -0.502429 |
| C | -0.326159 | -1.345364 | -0.362199 |
| C | -0.990661 | -0.133926 | -0.089149 |
| C | -0.212104 | 1.035871  | 0.056199  |
| C | 1.175634  | 0.971840  | -0.069733 |
| H | 2.013181  | 3.054081  | 0.288841  |
| H | 4.394113  | 1.976027  | -0.092471 |

|    |           |           |           |
|----|-----------|-----------|-----------|
| H  | 1.555964  | -2.373977 | -0.708237 |
| H  | -0.903005 | -2.264150 | -0.470049 |
| H  | -0.687383 | 1.995004  | 0.272745  |
| H  | 3.623420  | -0.169582 | -1.528126 |
| N  | 4.114660  | -0.862717 | 0.331089  |
| C  | 4.791001  | -1.569011 | 0.984188  |
| Si | -2.886423 | -0.045958 | 0.087658  |
| C  | -3.634438 | -1.773551 | -0.107156 |
| H  | -3.259741 | -2.472207 | 0.654529  |
| H  | -4.727503 | -1.723043 | 0.002350  |
| H  | -3.423447 | -2.204962 | -1.096163 |
| C  | -3.578873 | 1.106127  | -1.249945 |
| H  | -4.671660 | 1.198668  | -1.163159 |
| H  | -3.154205 | 2.117441  | -1.170156 |
| H  | -3.352949 | 0.730677  | -2.258213 |
| C  | -3.316707 | 0.649317  | 1.798050  |
| H  | -2.892479 | 1.653190  | 1.944706  |
| H  | -4.406215 | 0.729586  | 1.927655  |
| H  | -2.929543 | 0.005614  | 2.600695  |

tBu-NC-IND

Total energy (hartree): -597.279492

Sum of electronic and thermal Free Energies (hartree): -597.070541

|   |           |           |           |
|---|-----------|-----------|-----------|
| C | 1.850558  | 2.004803  | 0.061659  |
| C | 3.070544  | 1.473709  | -0.147394 |
| C | 2.949267  | -0.005477 | -0.495979 |
| C | 1.453764  | -0.258571 | -0.357057 |
| C | 0.713404  | -1.418723 | -0.498759 |
| C | -0.683394 | -1.349748 | -0.346321 |
| C | -1.346190 | -0.143926 | -0.063759 |
| C | -0.567048 | 1.024167  | 0.077568  |
| C | 0.817235  | 0.962433  | -0.061361 |
| H | 1.646671  | 3.049028  | 0.293724  |
| H | 4.029350  | 1.985038  | -0.111142 |
| H | 1.191858  | -2.374982 | -0.711971 |
| H | -1.250462 | -2.270924 | -0.453195 |
| H | -1.040215 | 1.979496  | 0.301914  |
| H | 3.263886  | -0.165480 | -1.540866 |
| N | 3.768801  | -0.854301 | 0.316112  |
| C | 4.452547  | -1.555810 | 0.966476  |
| C | -2.874378 | -0.057192 | 0.103154  |
| C | -3.204315 | 0.450416  | 1.526270  |
| H | -2.785047 | 1.447556  | 1.710991  |
| H | -4.293009 | 0.513591  | 1.664396  |
| H | -2.801569 | -0.231079 | 2.287705  |
| C | -3.563242 | -1.419660 | -0.092751 |

|   |           |           |           |
|---|-----------|-----------|-----------|
| H | -4.647976 | -1.303050 | 0.032556  |
| H | -3.387609 | -1.825814 | -1.098031 |
| H | -3.223383 | -2.160104 | 0.643805  |
| C | -3.449081 | 0.928380  | -0.940863 |
| H | -3.227433 | 0.590062  | -1.962155 |
| H | -4.540600 | 1.000579  | -0.833614 |
| H | -3.034090 | 1.937396  | -0.822200 |

Vin-1-NC-IND

Total energy (hartree): -517.419440

Sum of electronic and thermal Free Energies (hartree): -517.285522

|   |           |           |           |
|---|-----------|-----------|-----------|
| C | 1.006916  | 2.017548  | 0.006956  |
| C | 2.262280  | 1.572802  | -0.191694 |
| C | 2.252542  | 0.078031  | -0.489478 |
| C | 0.781705  | -0.284146 | -0.329978 |
| C | 0.138723  | -1.507646 | -0.424758 |
| C | -1.254674 | -1.540149 | -0.262918 |
| C | -2.004958 | -0.373691 | -0.018001 |
| C | -1.328462 | 0.862816  | 0.077153  |
| C | 0.054196  | 0.897022  | -0.071813 |
| H | 0.725467  | 3.050702  | 0.204470  |
| H | 3.179797  | 2.156115  | -0.180297 |
| H | 0.693083  | -2.428259 | -0.607945 |
| H | -1.775497 | -2.496046 | -0.328005 |
| H | -1.880182 | 1.781914  | 0.270757  |
| H | 2.571076  | -0.092576 | -1.531661 |
| N | 3.138394  | -0.679270 | 0.342609  |
| C | 3.877307  | -1.305870 | 1.009219  |
| C | -3.466573 | -0.494802 | 0.133710  |
| H | -3.851166 | -1.514474 | 0.044623  |
| C | -4.346943 | 0.492086  | 0.362907  |
| H | -4.053117 | 1.536908  | 0.465359  |
| H | -5.410567 | 0.276603  | 0.456611  |

Vin-2-NC-IND

Total energy (hartree): -517.419201

Sum of electronic and thermal Free Energies (hartree): -517.285362

|   |           |           |           |
|---|-----------|-----------|-----------|
| C | -1.333445 | 2.000931  | -0.081884 |
| C | -2.500522 | 1.373461  | 0.158964  |
| C | -2.250236 | -0.089701 | 0.504801  |
| C | -0.743834 | -0.222362 | 0.324792  |
| C | 0.087217  | -1.328805 | 0.448745  |
| C | 1.463796  | -1.158032 | 0.262021  |
| C | 2.018012  | 0.103562  | -0.039251 |
| C | 1.155677  | 1.212858  | -0.162153 |
| C | -0.217470 | 1.044306  | 0.013042  |

|   |           |           |           |
|---|-----------|-----------|-----------|
| H | -1.219521 | 3.057509  | -0.318815 |
| H | -3.498299 | 1.805258  | 0.148862  |
| H | -0.316931 | -2.315691 | 0.675101  |
| H | 2.115785  | -2.025405 | 0.352563  |
| H | 1.569211  | 2.194315  | -0.398490 |
| H | -2.519585 | -0.269321 | 1.559388  |
| N | -3.020309 | -1.006015 | -0.280954 |
| C | -3.662310 | -1.764264 | -0.910123 |
| C | 3.465090  | 0.310738  | -0.236477 |
| H | 3.750116  | 1.341420  | -0.465411 |
| C | 4.440033  | -0.608941 | -0.166917 |
| H | 4.249962  | -1.659221 | 0.054540  |
| H | 5.479387  | -0.329265 | -0.334417 |
